# Supplementary material for: DFT study of ionic peapod structures from single-walled carbon nanotubes and Lindqvist tungstates
Source: Royal Society of Chemistry journal article supplement (doi:10.1039/c2dt12068b), 2012-01-01
Supplement: c2dt12068b.pdf [file c2dt12068b.pdf]

**Supporting Information Available**

DFT study of ionic peapod structures from single-walled carbon nanotubes and Lindqvist tungstates

Wei Guan<sup>a,b</sup>, Zhijian Wu<sup>\*a</sup> and Zhongmin Su<sup>\*b</sup>

<sup>a</sup>State Key Laboratory of Rare Earth Resource Utilization, Changchun Institute of Applied Chemistry, Chinese Academy of Sciences, Changchun 130022, P. R. China E-mail: zjwu@ciac.jl.cn

<sup>b</sup>Institute of Functional Material Chemistry, Faculty of Chemistry, Northeast Normal University, Changchun 130024, P. R. China E-mail: zmsu@nenu.edu.cn

The material enclosed in the supporting information is organized as following:

1. Energy decomposition analysis (in kcal/mol) of interaction between POM and h-CNT at different y/z orientations of  $W_6O_{19}^{2-}$  encapsulated in (9,9) h-CNT with various methods in Table S1-S5.
2. Energy decomposition analysis (in kcal/mol) of interaction between POM and h-CNT at different y/z orientations of  $W_6O_{19}^{2-}$  encapsulated in (8,8) h-CNT with various methods in Table S6-S10.
3. Energy decomposition analysis (in kcal/mol) of interaction between POM and h-CNT for optimized  $W_6O_{19}^{2-}@ (10,10)$  h-CNT with BLYPGrimme3 method in Table S11.
4. Coordinates (xyz) for various y/z orientations of  $W_6O_{19}^{2-}$  encapsulated in (n,n) h-CNT (n = 8, 9, 10).

**Table S1.** Energy decomposition analysis (in kcal/mol) of interaction between POM and h-CNT at different y/z orientations of  $W_6O_{19}^{2-}$  encapsulated in (9,9) h-CNT with LDA method

| orientations         | $\Delta E_{\text{orb}}$ | $\Delta E_{\text{elstat}}$ | $\Delta E_{\text{Pauli}}$ | $\Delta E_{\text{int}}$ |
|----------------------|-------------------------|----------------------------|---------------------------|-------------------------|
| 0°/0°                | -140.02                 | -170.26                    | 291.78                    | -18.49                  |
| 15°/0°               | -129.06                 | -142.41                    | 235.68                    | -35.79                  |
| 30°/0°               | -114.98                 | -98.84                     | 156.54                    | -57.29                  |
| 45°/0°               | -110.97                 | -82.63                     | 131.84                    | -61.76                  |
| 45°/15°              | -99.74                  | -57.74                     | 78.90                     | -78.59                  |
| 45°/30°              | -90.72                  | -29.33                     | 21.19                     | -98.86                  |
| 45°/45°              | -92.55                  | -35.54                     | 32.30                     | -95.79                  |
| 45°/60°              | -106.39                 | -80.13                     | 114.03                    | -72.49                  |
| 45°/75°              | -133.38                 | -148.09                    | 248.03                    | -33.43                  |
| 45°/90°              | -139.77                 | -169.96                    | 290.98                    | -18.75                  |
| 45°/36 <sup>oa</sup> | -93.62                  | -40.38                     | 25.42                     | -108.58                 |

<sup>a</sup> The orientation is based on the fully optimized structure.

**Table S2.** Energy decomposition analysis (in kcal/mol) of interaction between POM and h-CNT at different y/z orientations of  $W_6O_{19}^{2-}$  encapsulated in (9,9) h-CNT with OPBE method

| orientations         | $\Delta E_{\text{orb}}$ | $\Delta E_{\text{elstat}}$ | $\Delta E_{\text{Pauli}}$ | $\Delta E_{\text{int}}$ |
|----------------------|-------------------------|----------------------------|---------------------------|-------------------------|
| 0°/0°                | -175.38                 | -150.94                    | 378.52                    | 52.21                   |
| 15°/0°               | -164.58                 | -124.15                    | 321.97                    | 33.24                   |
| 30°/0°               | -152.22                 | -82.58                     | 240.55                    | 5.74                    |
| 45°/0°               | -149.75                 | -67.21                     | 213.86                    | -3.10                   |
| 45°/15°              | -138.20                 | -43.15                     | 162.31                    | -19.03                  |
| 45°/30°              | -129.38                 | -16.04                     | 106.27                    | -39.15                  |
| 45°/45°              | -130.95                 | -21.96                     | 117.34                    | -35.58                  |
| 45°/60°              | -143.07                 | -64.44                     | 199.34                    | -8.17                   |
| 45°/75°              | -169.22                 | -129.76                    | 334.04                    | 35.06                   |
| 45°/90°              | -175.12                 | -150.65                    | 377.74                    | 51.97                   |
| 45°/36 <sup>oa</sup> | -129.75                 | -14.28                     | 98.68                     | -45.34                  |

<sup>a</sup> The orientation is based on the fully optimized structure.

**Table S3.** Energy decomposition analysis (in kcal/mol) of interaction between POM and h-CNT at different y/z orientations of  $W_6O_{19}^{2-}$  encapsulated in (9,9) h-CNT with BP86 method

| orientations         | $\Delta E_{\text{orb}}$ | $\Delta E_{\text{elstat}}$ | $\Delta E_{\text{Pauli}}$ | $\Delta E_{\text{int}}$ |
|----------------------|-------------------------|----------------------------|---------------------------|-------------------------|
| 0°/0°                | -141.66                 | -170.01                    | 354.11                    | 42.44                   |
| 15°/0°               | -131.30                 | -142.47                    | 296.02                    | 22.25                   |
| 30°/0°               | -118.21                 | -99.42                     | 212.47                    | -5.16                   |
| 45°/0°               | -114.60                 | -83.42                     | 185.39                    | -12.64                  |
| 45°/15°              | -103.86                 | -58.76                     | 131.37                    | -31.25                  |
| 45°/30°              | -95.46                  | -30.71                     | 71.83                     | -54.33                  |
| 45°/45°              | -97.14                  | -36.86                     | 83.52                     | -50.48                  |
| 45°/60°              | -109.99                 | -80.91                     | 169.37                    | -21.52                  |
| 45°/75°              | -135.60                 | -148.17                    | 308.31                    | 24.54                   |
| 45°/90°              | -141.41                 | -169.75                    | 353.34                    | 42.18                   |
| 45°/36 <sup>oa</sup> | -94.46                  | -31.35                     | 66.88                     | -58.92                  |

<sup>a</sup> The orientation is based on the fully optimized structure.

**Table S4.** Energy decomposition analysis (in kcal/mol) of interaction between POM and h-CNT at different y/z orientations of  $W_6O_{19}^{2-}$  encapsulated in (9,9) h-CNT with BLYP method

| orientations         | $\Delta E_{\text{orb}}$ | $\Delta E_{\text{elstat}}$ | $\Delta E_{\text{Pauli}}$ | $\Delta E_{\text{int}}$ |
|----------------------|-------------------------|----------------------------|---------------------------|-------------------------|
| 0°/0°                | -132.22                 | -178.20                    | 378.37                    | 67.95                   |
| 15°/0°               | -122.17                 | -150.49                    | 318.61                    | 45.95                   |
| 30°/0°               | -109.58                 | -107.16                    | 231.68                    | 14.94                   |
| 45°/0°               | -106.18                 | -90.95                     | 202.84                    | 5.71                    |
| 45°/15°              | -95.77                  | -66.30                     | 147.75                    | -14.32                  |
| 45°/30°              | -87.63                  | -38.15                     | 86.41                     | -39.37                  |
| 45°/45°              | -89.25                  | -44.31                     | 98.58                     | -34.98                  |
| 45°/60°              | -101.54                 | -88.67                     | 187.85                    | -2.36                   |
| 45°/75°              | -126.32                 | -156.14                    | 330.84                    | 48.38                   |
| 45°/90°              | -132.01                 | -177.85                    | 377.55                    | 67.68                   |
| 45°/36 <sup>oa</sup> | -85.34                  | -35.16                     | 77.54                     | -42.97                  |

<sup>a</sup> The orientation is based on the fully optimized structure.

**Table S5.** Energy decomposition analysis (in kcal/mol) of interaction between POM and h-CNT at different y/z orientations of  $W_6O_{19}^{2-}$  encapsulated in (9,9) h-CNT with BLYPGrimme3 method

| orientations         | $\Delta E_{orb}$ | $\Delta E_{elstat}$ | $\Delta E_{Pauli}$ | $\Delta E_{disp}$ | $\Delta E_{int}$ |
|----------------------|------------------|---------------------|--------------------|-------------------|------------------|
| 0°/0°                | -132.22          | -178.20             | 378.37             | -96.52            | -28.57           |
| 15°/0°               | -122.17          | -150.49             | 318.61             | -96.78            | -50.83           |
| 30°/0°               | -109.58          | -107.16             | 231.68             | -96.64            | -81.70           |
| 45°/0°               | -106.18          | -90.95              | 202.84             | -95.70            | -89.99           |
| 45°/15°              | -95.77           | -66.30              | 147.75             | -97.03            | -111.35          |
| 45°/30°              | -87.63           | -38.15              | 86.41              | -100.18           | -139.55          |
| 45°/45°              | -89.25           | -44.31              | 98.58              | -99.63            | -134.61          |
| 45°/60°              | -101.54          | -88.67              | 187.85             | -97.88            | -100.25          |
| 45°/75°              | -126.32          | -156.14             | 330.84             | -97.11            | -48.73           |
| 45°/90°              | -132.01          | -177.85             | 377.55             | -96.51            | -28.83           |
| 45°/36° <sup>a</sup> | -87.05           | -40.50              | 86.13              | -105.10           | -146.52          |

<sup>a</sup> The orientation is based on the fully optimized structure.

**Table S6.** Energy decomposition analysis (in kcal/mol) of interaction between POM and h-CNT at different y/z orientations of  $W_6O_{19}^{2-}$  encapsulated in (8,8) h-CNT with LDA method

| orientations         | $\Delta E_{orb}$ | $\Delta E_{elstat}$ | $\Delta E_{Pauli}$ | $\Delta E_{int}$ |
|----------------------|------------------|---------------------|--------------------|------------------|
| 0°/0°                | -667.46          | -953.58             | 2066.10            | 445.06           |
| 15°/0°               | -564.53          | -833.23             | 1764.26            | 366.49           |
| 30°/0°               | -428.45          | -625.94             | 1272.28            | 217.89           |
| 45°/0°               | -390.99          | -542.19             | 1090.96            | 157.79           |
| 45°/15°              | -293.81          | -439.33             | 819.94             | 86.80            |
| 45°/30°              | -179.53          | -292.98             | 446.83             | -25.68           |
| 45°/45°              | -208.02          | -336.66             | 548.45             | 3.77             |
| 45°/60°              | -354.51          | -562.47             | 1089.23            | 172.25           |
| 45°/75°              | -579.55          | -832.40             | 1760.23            | 348.28           |
| 45°/90°              | -666.11          | -952.48             | 2063.04            | 444.46           |
| 45°/39° <sup>a</sup> | -129.38          | -184.72             | 212.95             | -101.16          |

<sup>a</sup> The orientation is based on the fully optimized structure.

**Table S7.** Energy decomposition analysis (in kcal/mol) of interaction between POM and h-CNT at different y/z orientations of  $W_6O_{19}^{2-}$  encapsulated in (8,8) h-CNT with OPBE method

| orientations          | $\Delta E_{orb}$ | $\Delta E_{elstat}$ | $\Delta E_{Pauli}$ | $\Delta E_{int}$ |
|-----------------------|------------------|---------------------|--------------------|------------------|
| 0°/0°                 | -713.61          | -916.78             | 2184.03            | 553.64           |
| 15°/0°                | -611.06          | -797.63             | 1885.79            | 477.10           |
| 30°/0°                | -474.82          | -594.46             | 1403.61            | 334.32           |
| 45°/0°                | -438.09          | -513.51             | 1228.27            | 276.67           |
| 45°/15°               | -339.25          | -410.83             | 960.90             | 210.83           |
| 45°/30°               | -221.57          | -265.99             | 595.21             | 107.66           |
| 45°/45°               | -251.14          | -308.75             | 693.85             | 133.96           |
| 45°/60°               | -400.41          | -530.14             | 1221.42            | 290.87           |
| 45°/75°               | -626.54          | -796.47             | 1882.02            | 459.01           |
| 45°/90°               | -712.18          | -915.83             | 2181.07            | 553.06           |
| 45°/39° <sup>aa</sup> | -166.06          | -141.91             | 324.22             | 16.24            |

<sup>a</sup> The orientation is based on the fully optimized structure.

**Table S8.** Energy decomposition analysis (in kcal/mol) of interaction between POM and h-CNT at different y/z orientations of  $W_6O_{19}^{2-}$  encapsulated in (8,8) h-CNT with BP86 method

| Orientations          | $\Delta E_{orb}$ | $\Delta E_{elstat}$ | $\Delta E_{Pauli}$ | $\Delta E_{int}$ |
|-----------------------|------------------|---------------------|--------------------|------------------|
| 0°/0°                 | -654.82          | -947.37             | 2181.79            | 579.60           |
| 15°/0°                | -554.41          | -827.64             | 1877.72            | 495.66           |
| 30°/0°                | -422.43          | -621.93             | 1380.39            | 336.03           |
| 45°/0°                | -386.69          | -539.02             | 1195.69            | 269.98           |
| 45°/15°               | -291.41          | -436.58             | 924.21             | 196.21           |
| 45°/30°               | -179.66          | -291.14             | 550.17             | 79.37            |
| 45°/45°               | -207.48          | -334.48             | 652.35             | 110.39           |
| 45°/60°               | -349.73          | -558.56             | 1197.49            | 289.20           |
| 45°/75°               | -569.56          | -826.88             | 1873.99            | 477.56           |
| 45°/90°               | -653.49          | -946.28             | 2178.73            | 578.96           |
| 45°/39° <sup>aa</sup> | -125.25          | -158.90             | 266.23             | -17.92           |

<sup>a</sup> The orientation is based on the fully optimized structure.

**Table S9.** Energy decomposition analysis (in kcal/mol) of interaction between POM and h-CNT at different y/z orientations of  $W_6O_{19}^{2-}$  encapsulated in (8,8) h-CNT with BLYP method

| orientations         | $\Delta E_{orb}$ | $\Delta E_{elstat}$ | $\Delta E_{Pauli}$ | $\Delta E_{int}$ |
|----------------------|------------------|---------------------|--------------------|------------------|
| 0°/0°                | -634.84          | -955.26             | 2240.82            | 650.72           |
| 15°/0°               | -535.83          | -835.95             | 1934.52            | 562.74           |
| 30°/0°               | -406.47          | -630.62             | 1431.54            | 394.46           |
| 45°/0°               | -371.68          | -547.64             | 1243.31            | 323.98           |
| 45°/15°              | -277.77          | -445.76             | 971.04             | 247.51           |
| 45°/30°              | -168.15          | -300.98             | 595.31             | 126.18           |
| 45°/45°              | -195.31          | -344.16             | 698.28             | 158.81           |
| 45°/60°              | -334.40          | -567.66             | 1248.67            | 346.62           |
| 45°/75°              | -551.16          | -835.29             | 1930.89            | 544.45           |
| 45°/90°              | -633.53          | -954.15             | 2237.72            | 650.05           |
| 45°/39° <sup>a</sup> | -112.82          | -158.17             | 285.82             | 14.83            |

<sup>a</sup> The orientation is based on the fully optimized structure.

**Table S10.** Energy decomposition analysis (in kcal/mol) of interaction between POM and h-CNT at different y/z orientations of  $W_6O_{19}^{2-}$  encapsulated in (8,8) h-CNT with BLYPGrimme3 method

| Orientations         | $\Delta E_{orb}$ | $\Delta E_{elstat}$ | $\Delta E_{Pauli}$ | $\Delta E_{disp}$ | $\Delta E_{int}$ |
|----------------------|------------------|---------------------|--------------------|-------------------|------------------|
| 0°/0°                | -634.84          | -955.26             | 2240.82            | -126.00           | 524.72           |
| 15°/0°               | -535.83          | -835.95             | 1934.52            | -129.76           | 432.98           |
| 30°/0°               | -406.47          | -630.62             | 1431.54            | -141.45           | 253.01           |
| 45°/0°               | -371.68          | -547.64             | 1243.31            | -150.33           | 173.65           |
| 45°/15°              | -277.77          | -445.76             | 971.04             | -152.55           | 94.96            |
| 45°/30°              | -168.15          | -300.98             | 595.31             | -158.04           | -31.86           |
| 45°/45°              | -195.31          | -344.16             | 698.28             | -155.42           | 3.39             |
| 45°/60°              | -334.40          | -567.66             | 1248.67            | -140.26           | 206.35           |
| 45°/75°              | -551.16          | -835.29             | 1930.89            | -130.39           | 414.06           |
| 45°/90°              | -633.53          | -954.15             | 2237.72            | -126.02           | 524.03           |
| 45°/39° <sup>a</sup> | -113.65          | -163.33             | 293.82             | -163.05           | -146.21          |

<sup>a</sup> The orientation is based on the fully optimized structure.

**Table S11.** Energy decomposition analysis (in kcal/mol) of interaction between POM and h-CNT for optimized  $W_6O_{19}^{2-}@ (10,10)$  h-CNT with BLYPGrimme3 method

| $\Delta E_{orb}$ | $\Delta E_{elstat}$ | $\Delta E_{Pauli}$ | $\Delta E_{disp}$ | $\Delta E_{int}$ |
|------------------|---------------------|--------------------|-------------------|------------------|
| -71.89           | -31.30              | 77.72              | -76.18            | -101.65          |

**Coordinates (xyz)**

**W<sub>6</sub>O<sub>19</sub><sup>2-</sup>@(8,8) h-CNT (y/z = 0°/0°)**

217

|   |          |         |          |
|---|----------|---------|----------|
| C | -4.30492 | 1.42279 | -5.32884 |
| C | -1.84686 | 1.40599 | -5.23837 |
| C | 0.60489  | 1.40776 | -5.25063 |
| C | 3.06853  | 1.41116 | -5.26147 |
| C | 5.47690  | 1.51187 | -5.43810 |
| C | -4.30631 | 2.75755 | -4.77487 |
| C | -1.84825 | 2.70933 | -4.69881 |
| C | 0.60347  | 2.72095 | -4.70735 |
| C | 3.06709  | 2.72975 | -4.71697 |
| C | 5.47524  | 2.78648 | -4.91323 |
| C | -5.49321 | 3.46066 | -4.43525 |
| C | -3.08381 | 3.30912 | -4.31728 |
| C | -0.62004 | 3.30923 | -4.31225 |
| C | 1.83186  | 3.31044 | -4.30597 |
| C | 4.28923  | 3.36592 | -4.38752 |
| C | -5.49317 | 4.43489 | -3.46026 |
| C | -3.08374 | 4.31783 | -3.30835 |
| C | -0.62001 | 4.31537 | -3.30851 |
| C | 1.83175  | 4.30859 | -3.30933 |
| C | 4.28952  | 4.38688 | -3.36491 |
| C | -4.30656 | 4.77367 | -2.75649 |
| C | -1.84841 | 4.70145 | -2.70903 |
| C | 0.60341  | 4.71146 | -2.72066 |
| C | 3.06729  | 4.71865 | -2.72900 |
| C | 5.47638  | 4.90874 | -2.78409 |
| C | -4.30573 | 5.32580 | -1.42098 |
| C | -1.84727 | 5.24066 | -1.40552 |
| C | 0.60450  | 5.25403 | -1.40707 |
| C | 3.06841  | 5.26287 | -1.41030 |
| C | 5.47739  | 5.43350 | -1.50982 |
| C | -5.49160 | 5.58314 | -0.68197 |
| C | -3.08190 | 5.39401 | -0.70960 |
| C | -0.61782 | 5.39031 | -0.70989 |

|   |          |         |          |
|---|----------|---------|----------|
| C | 1.83403  | 5.38428 | -0.70757 |
| C | 4.29213  | 5.47355 | -0.72798 |
| C | -5.48939 | 5.58319 | 0.69610  |
| C | -3.07991 | 5.39336 | 0.71720  |
| C | -0.61585 | 5.38964 | 0.71145  |
| C | 1.83580  | 5.38343 | 0.70305  |
| C | 4.29400  | 5.47258 | 0.71679  |
| C | -4.30176 | 5.32594 | 1.43173  |
| C | -1.84357 | 5.23931 | 1.41004  |
| C | 0.60816  | 5.25225 | 1.40546  |
| C | 3.07206  | 5.26124 | 1.40230  |
| C | 5.48165  | 5.43084 | 1.49523  |
| C | -4.29962 | 4.77238 | 2.76646  |
| C | -1.84134 | 4.69988 | 2.71369  |
| C | 0.61046  | 4.70728 | 2.71811  |
| C | 3.07424  | 4.71503 | 2.72027  |
| C | 5.48374  | 4.90443 | 2.76894  |
| C | -5.48473 | 4.43360 | 3.47317  |
| C | -3.07539 | 4.31763 | 3.31642  |
| C | -0.61146 | 4.31279 | 3.30999  |
| C | 1.84017  | 4.30413 | 3.30370  |
| C | 4.29822  | 4.38172 | 3.35198  |
| C | -5.48254 | 3.46099 | 4.44958  |
| C | -3.07286 | 3.30948 | 4.32597  |
| C | -0.60906 | 3.30799 | 4.31532  |
| C | 1.84230  | 3.30648 | 4.30118  |
| C | 4.30032  | 3.35873 | 4.37240  |
| C | -4.29452 | 2.75816 | 4.78625  |
| C | -1.83664 | 2.70922 | 4.70535  |
| C | 0.61480  | 2.71839 | 4.70760  |
| C | 3.07845  | 2.72456 | 4.70786  |
| C | 5.48790  | 2.77789 | 4.89254  |
| C | -4.29209 | 1.42316 | 5.33900  |
| C | -1.83470 | 1.40552 | 5.24437  |
| C | 0.61664  | 1.40540 | 5.25220  |
| C | 3.08048  | 1.40636 | 5.25366  |
| C | 5.48985  | 1.50493 | 5.42082  |



|   |          |          |         |
|---|----------|----------|---------|
| C | -5.47754 | 0.68550  | 5.59987 |
| C | -3.06919 | 0.71055  | 5.40178 |
| C | -0.60571 | 0.70885  | 5.39230 |
| C | 1.84593  | 0.70460  | 5.37929 |
| C | 4.30417  | 0.72353  | 5.46523 |
| C | -5.47719 | -0.69272 | 5.59886 |
| C | -3.06856 | -0.71631 | 5.40116 |
| C | -0.60484 | -0.71251 | 5.39188 |
| C | 1.84687  | -0.70616 | 5.38040 |
| C | 4.30530  | -0.72143 | 5.46684 |
| C | -4.29111 | -1.42970 | 5.33722 |
| C | -1.83322 | -1.41046 | 5.24440 |
| C | 0.61848  | -1.40765 | 5.25259 |
| C | 3.08275  | -1.40632 | 5.25668 |
| C | 5.49216  | -1.50137 | 5.42410 |
| C | -4.29104 | -2.76477 | 4.78395 |
| C | -1.83299 | -2.71379 | 4.70457 |
| C | 0.61877  | -2.72063 | 4.70851 |
| C | 3.08306  | -2.72461 | 4.71146 |
| C | 5.49261  | -2.77447 | 4.89610 |
| C | -5.47753 | -3.46988 | 4.44663 |
| C | -3.06854 | -3.31486 | 4.32442 |
| C | -0.60446 | -3.31106 | 4.31512 |
| C | 1.84757  | -3.30743 | 4.30373 |
| C | 4.30572  | -3.35729 | 4.37663 |
| C | -5.47802 | -4.44296 | 3.47029 |
| C | -3.06910 | -4.32254 | 3.31424 |
| C | -0.60521 | -4.31588 | 3.31005 |
| C | 1.84678  | -4.30426 | 3.30554 |
| C | 4.30463  | -4.37834 | 3.35454 |
| C | -4.29214 | -4.78040 | 2.76454 |
| C | -1.83428 | -4.70336 | 2.71222 |
| C | 0.61763  | -4.70864 | 2.71930 |
| C | 3.08153  | -4.71206 | 2.72181 |
| C | 5.49093  | -4.89773 | 2.77107 |
| C | -4.29283 | -5.33340 | 1.42964 |
| C | -1.83502 | -5.24311 | 1.40894 |

|   |          |          |          |
|---|----------|----------|----------|
| C | 0.61666  | -5.25177 | 1.40580  |
| C | 3.08067  | -5.25697 | 1.40344  |
| C | 5.49031  | -5.42380 | 1.49738  |
| C | -5.48007 | -5.59232 | 0.69381  |
| C | -3.07075 | -5.39876 | 0.71546  |
| C | -0.60695 | -5.39089 | 0.71089  |
| C | 1.84488  | -5.38073 | 0.70364  |
| C | 4.30313  | -5.46761 | 0.71871  |
| C | -5.48143 | -5.58999 | -0.68433 |
| C | -3.07211 | -5.39774 | -0.71116 |
| C | -0.60824 | -5.39097 | -0.71043 |
| C | 1.84371  | -5.38190 | -0.70708 |
| C | 4.30208  | -5.46797 | -0.72594 |
| C | -4.29579 | -5.33069 | -1.42244 |
| C | -1.83757 | -5.24253 | -1.40684 |
| C | 0.61442  | -5.25258 | -1.40707 |
| C | 3.07849  | -5.25794 | -1.40884 |
| C | 5.48819  | -5.42281 | -1.50651 |
| C | -4.29727 | -4.77837 | -2.75740 |
| C | -1.83885 | -4.70357 | -2.71051 |
| C | 0.61342  | -4.70803 | -2.71995 |
| C | 3.07767  | -4.70985 | -2.72595 |
| C | 5.48707  | -4.89509 | -2.77963 |
| C | -5.48458 | -4.44145 | -3.46128 |
| C | -3.07484 | -4.32292 | -3.31056 |
| C | -0.61057 | -4.31566 | -3.30952 |
| C | 1.84155  | -4.30237 | -3.30755 |
| C | 4.29976  | -4.37405 | -3.36004 |
| C | -5.48549 | -3.46953 | -4.43828 |
| C | -3.07606 | -3.31498 | -4.32025 |
| C | -0.61201 | -3.31062 | -4.31435 |
| C | 1.84020  | -3.30461 | -4.30489 |
| C | 4.29835  | -3.35150 | -4.38073 |
| C | -4.29944 | -2.76528 | -4.77839 |
| C | -1.84140 | -2.71338 | -4.70148 |
| C | 0.61045  | -2.71900 | -4.70799 |
| C | 3.07450  | -2.72002 | -4.71428 |

|   |          |          |          |
|---|----------|----------|----------|
| C | 5.48384  | -2.76804 | -4.90322 |
| C | -4.30124 | -1.43013 | -5.33115 |
| C | -1.84337 | -1.40944 | -5.23984 |
| C | 0.60857  | -1.40536 | -5.25066 |
| C | 3.07239  | -1.40170 | -5.26034 |
| C | 5.48160  | -1.49549 | -5.43259 |
| C | -5.48849 | -0.69405 | -5.59066 |
| C | -3.07938 | -0.71599 | -5.39552 |
| C | -0.61554 | -0.71101 | -5.38859 |
| C | 1.83606  | -0.70235 | -5.38122 |
| C | 4.29411  | -0.71643 | -5.47482 |
| C | -5.49056 | 0.68435  | -5.58884 |
| C | -3.08138 | 0.71075  | -5.39462 |
| C | -0.61742 | 0.71031  | -5.38818 |
| C | 1.83420  | 0.70836  | -5.38149 |
| C | 4.29196  | 0.72887  | -5.47594 |
| H | 6.42247  | 1.08806  | -5.75616 |
| H | 6.41952  | 3.31363  | -4.83975 |
| H | -6.43890 | 3.18801  | -4.88933 |
| H | -6.43887 | 4.88844  | -3.18673 |
| H | 6.42128  | 4.83340  | -3.30980 |
| H | 6.42301  | 5.74980  | -1.08485 |
| H | -6.43814 | 5.71049  | -1.19460 |
| H | -6.43445 | 5.71047  | 1.21147  |
| H | 6.42636  | 5.74728  | 1.06829  |
| H | 6.42992  | 4.82777  | 3.29224  |
| H | -6.43107 | 4.88709  | 3.20187  |
| H | -6.42711 | 3.18839  | 4.90611  |
| H | 6.43279  | 3.30298  | 4.81342  |
| H | 6.43626  | 1.08070  | 5.73584  |
| H | -6.42299 | 1.19919  | 5.73038  |
| H | -6.42239 | -1.20712 | 5.72850  |
| H | 6.43775  | -1.07492 | 5.73860  |
| H | 6.43850  | -3.29789 | 4.81718  |
| H | -6.42269 | -3.19825 | 4.90249  |
| H | -6.42359 | -4.89776 | 3.19851  |
| H | 6.43697  | -4.81866 | 3.29412  |

|   |          |          |          |
|---|----------|----------|----------|
| H | 6.43579  | -5.73758 | 1.07027  |
| H | -6.42500 | -5.72179 | 1.20886  |
| H | -6.42744 | -5.71830 | -1.19762 |
| H | 6.43444  | -5.73728 | -1.08156 |
| H | 6.43240  | -4.81493 | -3.30381 |
| H | -6.42975 | -4.89535 | -3.18705 |
| H | -6.43134 | -3.19802 | -4.89268 |
| H | 6.43035  | -3.29062 | -4.82609 |
| H | 6.42636  | -1.06916 | -5.74993 |
| H | -6.43318 | -1.20942 | -5.72020 |
| H | -6.43683 | 1.19729  | -5.71683 |
| O | 0.00001  | -0.00001 | -0.00001 |
| W | 2.32689  | 0.00000  | -0.00000 |
| W | -2.32689 | -0.00001 | -0.00001 |
| W | 0.00000  | 0.00000  | 2.32687  |
| W | -0.00000 | 0.00001  | -2.32686 |
| W | -0.00001 | -2.32686 | 0.00000  |
| W | 0.00001  | 2.32687  | 0.00001  |
| O | 1.88436  | 1.88435  | 0.00000  |
| O | -1.88434 | 1.88432  | 0.00001  |
| O | -1.88436 | -1.88435 | -0.00001 |
| O | 1.88435  | -1.88433 | -0.00001 |
| O | 1.88435  | -0.00000 | -1.88436 |
| O | 1.88435  | -0.00000 | 1.88435  |
| O | -1.88434 | -0.00002 | 1.88435  |
| O | -1.88435 | -0.00001 | -1.88435 |
| O | -0.00001 | -1.88437 | -1.88437 |
| O | -0.00001 | -1.88438 | 1.88438  |
| O | 0.00000  | 1.88438  | 1.88438  |
| O | -0.00000 | 1.88438  | -1.88437 |
| O | -0.00001 | 0.00005  | 4.04246  |
| O | -0.00002 | 0.00000  | -4.04246 |
| O | 0.00002  | 4.04246  | -0.00001 |
| O | -0.00001 | -4.04246 | 0.00003  |
| O | 4.04250  | 0.00002  | 0.00000  |
| O | -4.04250 | -0.00002 | -0.00000 |

**W<sub>6</sub>O<sub>19</sub><sup>2-</sup>@(8,8) h-CNT (y/z = 15°/0°)**

217

|   |          |         |          |
|---|----------|---------|----------|
| C | -4.30492 | 1.42279 | -5.32884 |
| C | -1.84686 | 1.40599 | -5.23837 |
| C | 0.60489  | 1.40776 | -5.25063 |
| C | 3.06853  | 1.41116 | -5.26147 |
| C | 5.47690  | 1.51187 | -5.43810 |
| C | -4.30631 | 2.75755 | -4.77487 |
| C | -1.84825 | 2.70933 | -4.69881 |
| C | 0.60347  | 2.72095 | -4.70735 |
| C | 3.06709  | 2.72975 | -4.71697 |
| C | 5.47524  | 2.78648 | -4.91323 |
| C | -5.49321 | 3.46066 | -4.43525 |
| C | -3.08381 | 3.30912 | -4.31728 |
| C | -0.62004 | 3.30923 | -4.31225 |
| C | 1.83186  | 3.31044 | -4.30597 |
| C | 4.28923  | 3.36592 | -4.38752 |
| C | -5.49317 | 4.43489 | -3.46026 |
| C | -3.08374 | 4.31783 | -3.30835 |
| C | -0.62001 | 4.31537 | -3.30851 |
| C | 1.83175  | 4.30859 | -3.30933 |
| C | 4.28952  | 4.38688 | -3.36491 |
| C | -4.30656 | 4.77367 | -2.75649 |
| C | -1.84841 | 4.70145 | -2.70903 |
| C | 0.60341  | 4.71146 | -2.72066 |
| C | 3.06729  | 4.71865 | -2.72900 |
| C | 5.47638  | 4.90874 | -2.78409 |
| C | -4.30573 | 5.32580 | -1.42098 |
| C | -1.84727 | 5.24066 | -1.40552 |
| C | 0.60450  | 5.25403 | -1.40707 |
| C | 3.06841  | 5.26287 | -1.41030 |
| C | 5.47739  | 5.43350 | -1.50982 |
| C | -5.49160 | 5.58314 | -0.68197 |
| C | -3.08190 | 5.39401 | -0.70960 |
| C | -0.61782 | 5.39031 | -0.70989 |
| C | 1.83403  | 5.38428 | -0.70757 |
| C | 4.29213  | 5.47355 | -0.72798 |
| C | -5.48939 | 5.58319 | 0.69610  |

|   |          |         |         |
|---|----------|---------|---------|
| C | -3.07991 | 5.39336 | 0.71720 |
| C | -0.61585 | 5.38964 | 0.71145 |
| C | 1.83580  | 5.38343 | 0.70305 |
| C | 4.29400  | 5.47258 | 0.71679 |
| C | -4.30176 | 5.32594 | 1.43173 |
| C | -1.84357 | 5.23931 | 1.41004 |
| C | 0.60816  | 5.25225 | 1.40546 |
| C | 3.07206  | 5.26124 | 1.40230 |
| C | 5.48165  | 5.43084 | 1.49523 |
| C | -4.29962 | 4.77238 | 2.76646 |
| C | -1.84134 | 4.69988 | 2.71369 |
| C | 0.61046  | 4.70728 | 2.71811 |
| C | 3.07424  | 4.71503 | 2.72027 |
| C | 5.48374  | 4.90443 | 2.76894 |
| C | -5.48473 | 4.43360 | 3.47317 |
| C | -3.07539 | 4.31763 | 3.31642 |
| C | -0.61146 | 4.31279 | 3.30999 |
| C | 1.84017  | 4.30413 | 3.30370 |
| C | 4.29822  | 4.38172 | 3.35198 |
| C | -5.48254 | 3.46099 | 4.44958 |
| C | -3.07286 | 3.30948 | 4.32597 |
| C | -0.60906 | 3.30799 | 4.31532 |
| C | 1.84230  | 3.30648 | 4.30118 |
| C | 4.30032  | 3.35873 | 4.37240 |
| C | -4.29452 | 2.75816 | 4.78625 |
| C | -1.83664 | 2.70922 | 4.70535 |
| C | 0.61480  | 2.71839 | 4.70760 |
| C | 3.07845  | 2.72456 | 4.70786 |
| C | 5.48790  | 2.77789 | 4.89254 |
| C | -4.29209 | 1.42316 | 5.33900 |
| C | -1.83470 | 1.40552 | 5.24437 |
| C | 0.61664  | 1.40540 | 5.25220 |
| C | 3.08048  | 1.40636 | 5.25366 |
| C | 5.48985  | 1.50493 | 5.42082 |
| C | -5.47754 | 0.68550 | 5.59987 |
| C | -3.06919 | 0.71055 | 5.40178 |
| C | -0.60571 | 0.70885 | 5.39230 |

|   |          |          |         |
|---|----------|----------|---------|
| C | 1.84593  | 0.70460  | 5.37929 |
| C | 4.30417  | 0.72353  | 5.46523 |
| C | -5.47719 | -0.69272 | 5.59886 |
| C | -3.06856 | -0.71631 | 5.40116 |
| C | -0.60484 | -0.71251 | 5.39188 |
| C | 1.84687  | -0.70616 | 5.38040 |
| C | 4.30530  | -0.72143 | 5.46684 |
| C | -4.29111 | -1.42970 | 5.33722 |
| C | -1.83322 | -1.41046 | 5.24440 |
| C | 0.61848  | -1.40765 | 5.25259 |
| C | 3.08275  | -1.40632 | 5.25668 |
| C | 5.49216  | -1.50137 | 5.42410 |
| C | -4.29104 | -2.76477 | 4.78395 |
| C | -1.83299 | -2.71379 | 4.70457 |
| C | 0.61877  | -2.72063 | 4.70851 |
| C | 3.08306  | -2.72461 | 4.71146 |
| C | 5.49261  | -2.77447 | 4.89610 |
| C | -5.47753 | -3.46988 | 4.44663 |
| C | -3.06854 | -3.31486 | 4.32442 |
| C | -0.60446 | -3.31106 | 4.31512 |
| C | 1.84757  | -3.30743 | 4.30373 |
| C | 4.30572  | -3.35729 | 4.37663 |
| C | -5.47802 | -4.44296 | 3.47029 |
| C | -3.06910 | -4.32254 | 3.31424 |
| C | -0.60521 | -4.31588 | 3.31005 |
| C | 1.84678  | -4.30426 | 3.30554 |
| C | 4.30463  | -4.37834 | 3.35454 |
| C | -4.29214 | -4.78040 | 2.76454 |
| C | -1.83428 | -4.70336 | 2.71222 |
| C | 0.61763  | -4.70864 | 2.71930 |
| C | 3.08153  | -4.71206 | 2.72181 |
| C | 5.49093  | -4.89773 | 2.77107 |
| C | -4.29283 | -5.33340 | 1.42964 |
| C | -1.83502 | -5.24311 | 1.40894 |
| C | 0.61666  | -5.25177 | 1.40580 |
| C | 3.08067  | -5.25697 | 1.40344 |
| C | 5.49031  | -5.42380 | 1.49738 |

|   |          |          |          |
|---|----------|----------|----------|
| C | -5.48007 | -5.59232 | 0.69381  |
| C | -3.07075 | -5.39876 | 0.71546  |
| C | -0.60695 | -5.39089 | 0.71089  |
| C | 1.84488  | -5.38073 | 0.70364  |
| C | 4.30313  | -5.46761 | 0.71871  |
| C | -5.48143 | -5.58999 | -0.68433 |
| C | -3.07211 | -5.39774 | -0.71116 |
| C | -0.60824 | -5.39097 | -0.71043 |
| C | 1.84371  | -5.38190 | -0.70708 |
| C | 4.30208  | -5.46797 | -0.72594 |
| C | -4.29579 | -5.33069 | -1.42244 |
| C | -1.83757 | -5.24253 | -1.40684 |
| C | 0.61442  | -5.25258 | -1.40707 |
| C | 3.07849  | -5.25794 | -1.40884 |
| C | 5.48819  | -5.42281 | -1.50651 |
| C | -4.29727 | -4.77837 | -2.75740 |
| C | -1.83885 | -4.70357 | -2.71051 |
| C | 0.61342  | -4.70803 | -2.71995 |
| C | 3.07767  | -4.70985 | -2.72595 |
| C | 5.48707  | -4.89509 | -2.77963 |
| C | -5.48458 | -4.44145 | -3.46128 |
| C | -3.07484 | -4.32292 | -3.31056 |
| C | -0.61057 | -4.31566 | -3.30952 |
| C | 1.84155  | -4.30237 | -3.30755 |
| C | 4.29976  | -4.37405 | -3.36004 |
| C | -5.48549 | -3.46953 | -4.43828 |
| C | -3.07606 | -3.31498 | -4.32025 |
| C | -0.61201 | -3.31062 | -4.31435 |
| C | 1.84020  | -3.30461 | -4.30489 |
| C | 4.29835  | -3.35150 | -4.38073 |
| C | -4.29944 | -2.76528 | -4.77839 |
| C | -1.84140 | -2.71338 | -4.70148 |
| C | 0.61045  | -2.71900 | -4.70799 |
| C | 3.07450  | -2.72002 | -4.71428 |
| C | 5.48384  | -2.76804 | -4.90322 |
| C | -4.30124 | -1.43013 | -5.33115 |
| C | -1.84337 | -1.40944 | -5.23984 |



|   |          |          |          |
|---|----------|----------|----------|
| C | 0.60857  | -1.40536 | -5.25066 |
| C | 3.07239  | -1.40170 | -5.26034 |
| C | 5.48160  | -1.49549 | -5.43259 |
| C | -5.48849 | -0.69405 | -5.59066 |
| C | -3.07938 | -0.71599 | -5.39552 |
| C | -0.61554 | -0.71101 | -5.38859 |
| C | 1.83606  | -0.70235 | -5.38122 |
| C | 4.29411  | -0.71643 | -5.47482 |
| C | -5.49056 | 0.68435  | -5.58884 |
| C | -3.08138 | 0.71075  | -5.39462 |
| C | -0.61742 | 0.71031  | -5.38818 |
| C | 1.83420  | 0.70836  | -5.38149 |
| C | 4.29196  | 0.72887  | -5.47594 |
| H | 6.42247  | 1.08806  | -5.75616 |
| H | 6.41952  | 3.31363  | -4.83975 |
| H | -6.43890 | 3.18801  | -4.88933 |
| H | -6.43887 | 4.88844  | -3.18673 |
| H | 6.42128  | 4.83340  | -3.30980 |
| H | 6.42301  | 5.74980  | -1.08485 |
| H | -6.43814 | 5.71049  | -1.19460 |
| H | -6.43445 | 5.71047  | 1.21147  |
| H | 6.42636  | 5.74728  | 1.06829  |
| H | 6.42992  | 4.82777  | 3.29224  |
| H | -6.43107 | 4.88709  | 3.20187  |
| H | -6.42711 | 3.18839  | 4.90611  |
| H | 6.43279  | 3.30298  | 4.81342  |
| H | 6.43626  | 1.08070  | 5.73584  |
| H | -6.42299 | 1.19919  | 5.73038  |
| H | -6.42239 | -1.20712 | 5.72850  |
| H | 6.43775  | -1.07492 | 5.73860  |
| H | 6.43850  | -3.29789 | 4.81718  |
| H | -6.42269 | -3.19825 | 4.90249  |
| H | -6.42359 | -4.89776 | 3.19851  |
| H | 6.43697  | -4.81866 | 3.29412  |
| H | 6.43579  | -5.73758 | 1.07027  |
| H | -6.42500 | -5.72179 | 1.20886  |
| H | -6.42744 | -5.71830 | -1.19762 |

|   |          |          |          |
|---|----------|----------|----------|
| H | 6.43444  | -5.73728 | -1.08156 |
| H | 6.43240  | -4.81493 | -3.30381 |
| H | -6.42975 | -4.89535 | -3.18705 |
| H | -6.43134 | -3.19802 | -4.89268 |
| H | 6.43035  | -3.29062 | -4.82609 |
| H | 6.42636  | -1.06916 | -5.74993 |
| H | -6.43318 | -1.20942 | -5.72020 |
| H | -6.43683 | 1.19729  | -5.71683 |
| O | 0.00000  | -0.00001 | -0.00001 |
| W | 2.24760  | 0.00000  | -0.60225 |
| W | -2.24760 | -0.00001 | 0.60223  |
| W | 0.60224  | 0.00000  | 2.24758  |
| W | -0.60224 | 0.00001  | -2.24757 |
| W | -0.00001 | -2.32686 | 0.00000  |
| W | 0.00001  | 2.32687  | 0.00000  |
| O | 1.82015  | 1.88435  | -0.48770 |
| O | -1.82013 | 1.88432  | 0.48771  |
| O | -1.82015 | -1.88435 | 0.48770  |
| O | 1.82014  | -1.88433 | -0.48772 |
| O | 1.33244  | -0.00000 | -2.30785 |
| O | 2.30785  | -0.00000 | 1.33244  |
| O | -1.33243 | -0.00002 | 2.30784  |
| O | -2.30785 | -0.00001 | -1.33244 |
| O | -0.48772 | -1.88437 | -1.82016 |
| O | 0.48771  | -1.88438 | 1.82017  |
| O | 0.48772  | 1.88438  | 1.82017  |
| O | -0.48771 | 1.88438  | -1.82016 |
| O | 1.04626  | 0.00005  | 3.90472  |
| O | -1.04629 | 0.00000  | -3.90471 |
| O | 0.00001  | 4.04246  | -0.00002 |
| O | -0.00000 | -4.04246 | 0.00003  |
| O | 3.90475  | 0.00002  | -1.04627 |
| O | -3.90476 | -0.00002 | 1.04627  |

**W<sub>6</sub>O<sub>19</sub><sup>2-</sup>@(8,8) h-CNT (y/z = 30°/0°)**

217

|   |          |         |          |
|---|----------|---------|----------|
| C | -4.30492 | 1.42279 | -5.32884 |
|---|----------|---------|----------|

|   |          |         |          |
|---|----------|---------|----------|
| C | -1.84686 | 1.40599 | -5.23837 |
| C | 0.60489  | 1.40776 | -5.25063 |
| C | 3.06853  | 1.41116 | -5.26147 |
| C | 5.47690  | 1.51187 | -5.43810 |
| C | -4.30631 | 2.75755 | -4.77487 |
| C | -1.84825 | 2.70933 | -4.69881 |
| C | 0.60347  | 2.72095 | -4.70735 |
| C | 3.06709  | 2.72975 | -4.71697 |
| C | 5.47524  | 2.78648 | -4.91323 |
| C | -5.49321 | 3.46066 | -4.43525 |
| C | -3.08381 | 3.30912 | -4.31728 |
| C | -0.62004 | 3.30923 | -4.31225 |
| C | 1.83186  | 3.31044 | -4.30597 |
| C | 4.28923  | 3.36592 | -4.38752 |
| C | -5.49317 | 4.43489 | -3.46026 |
| C | -3.08374 | 4.31783 | -3.30835 |
| C | -0.62001 | 4.31537 | -3.30851 |
| C | 1.83175  | 4.30859 | -3.30933 |
| C | 4.28952  | 4.38688 | -3.36491 |
| C | -4.30656 | 4.77367 | -2.75649 |
| C | -1.84841 | 4.70145 | -2.70903 |
| C | 0.60341  | 4.71146 | -2.72066 |
| C | 3.06729  | 4.71865 | -2.72900 |
| C | 5.47638  | 4.90874 | -2.78409 |
| C | -4.30573 | 5.32580 | -1.42098 |
| C | -1.84727 | 5.24066 | -1.40552 |
| C | 0.60450  | 5.25403 | -1.40707 |
| C | 3.06841  | 5.26287 | -1.41030 |
| C | 5.47739  | 5.43350 | -1.50982 |
| C | -5.49160 | 5.58314 | -0.68197 |
| C | -3.08190 | 5.39401 | -0.70960 |
| C | -0.61782 | 5.39031 | -0.70989 |
| C | 1.83403  | 5.38428 | -0.70757 |
| C | 4.29213  | 5.47355 | -0.72798 |
| C | -5.48939 | 5.58319 | 0.69610  |
| C | -3.07991 | 5.39336 | 0.71720  |
| C | -0.61585 | 5.38964 | 0.71145  |

|   |          |         |         |
|---|----------|---------|---------|
| C | 1.83580  | 5.38343 | 0.70305 |
| C | 4.29400  | 5.47258 | 0.71679 |
| C | -4.30176 | 5.32594 | 1.43173 |
| C | -1.84357 | 5.23931 | 1.41004 |
| C | 0.60816  | 5.25225 | 1.40546 |
| C | 3.07206  | 5.26124 | 1.40230 |
| C | 5.48165  | 5.43084 | 1.49523 |
| C | -4.29962 | 4.77238 | 2.76646 |
| C | -1.84134 | 4.69988 | 2.71369 |
| C | 0.61046  | 4.70728 | 2.71811 |
| C | 3.07424  | 4.71503 | 2.72027 |
| C | 5.48374  | 4.90443 | 2.76894 |
| C | -5.48473 | 4.43360 | 3.47317 |
| C | -3.07539 | 4.31763 | 3.31642 |
| C | -0.61146 | 4.31279 | 3.30999 |
| C | 1.84017  | 4.30413 | 3.30370 |
| C | 4.29822  | 4.38172 | 3.35198 |
| C | -5.48254 | 3.46099 | 4.44958 |
| C | -3.07286 | 3.30948 | 4.32597 |
| C | -0.60906 | 3.30799 | 4.31532 |
| C | 1.84230  | 3.30648 | 4.30118 |
| C | 4.30032  | 3.35873 | 4.37240 |
| C | -4.29452 | 2.75816 | 4.78625 |
| C | -1.83664 | 2.70922 | 4.70535 |
| C | 0.61480  | 2.71839 | 4.70760 |
| C | 3.07845  | 2.72456 | 4.70786 |
| C | 5.48790  | 2.77789 | 4.89254 |
| C | -4.29209 | 1.42316 | 5.33900 |
| C | -1.83470 | 1.40552 | 5.24437 |
| C | 0.61664  | 1.40540 | 5.25220 |
| C | 3.08048  | 1.40636 | 5.25366 |
| C | 5.48985  | 1.50493 | 5.42082 |
| C | -5.47754 | 0.68550 | 5.59987 |
| C | -3.06919 | 0.71055 | 5.40178 |
| C | -0.60571 | 0.70885 | 5.39230 |
| C | 1.84593  | 0.70460 | 5.37929 |
| C | 4.30417  | 0.72353 | 5.46523 |

|   |          |          |         |
|---|----------|----------|---------|
| C | -5.47719 | -0.69272 | 5.59886 |
| C | -3.06856 | -0.71631 | 5.40116 |
| C | -0.60484 | -0.71251 | 5.39188 |
| C | 1.84687  | -0.70616 | 5.38040 |
| C | 4.30530  | -0.72143 | 5.46684 |
| C | -4.29111 | -1.42970 | 5.33722 |
| C | -1.83322 | -1.41046 | 5.24440 |
| C | 0.61848  | -1.40765 | 5.25259 |
| C | 3.08275  | -1.40632 | 5.25668 |
| C | 5.49216  | -1.50137 | 5.42410 |
| C | -4.29104 | -2.76477 | 4.78395 |
| C | -1.83299 | -2.71379 | 4.70457 |
| C | 0.61877  | -2.72063 | 4.70851 |
| C | 3.08306  | -2.72461 | 4.71146 |
| C | 5.49261  | -2.77447 | 4.89610 |
| C | -5.47753 | -3.46988 | 4.44663 |
| C | -3.06854 | -3.31486 | 4.32442 |
| C | -0.60446 | -3.31106 | 4.31512 |
| C | 1.84757  | -3.30743 | 4.30373 |
| C | 4.30572  | -3.35729 | 4.37663 |
| C | -5.47802 | -4.44296 | 3.47029 |
| C | -3.06910 | -4.32254 | 3.31424 |
| C | -0.60521 | -4.31588 | 3.31005 |
| C | 1.84678  | -4.30426 | 3.30554 |
| C | 4.30463  | -4.37834 | 3.35454 |
| C | -4.29214 | -4.78040 | 2.76454 |
| C | -1.83428 | -4.70336 | 2.71222 |
| C | 0.61763  | -4.70864 | 2.71930 |
| C | 3.08153  | -4.71206 | 2.72181 |
| C | 5.49093  | -4.89773 | 2.77107 |
| C | -4.29283 | -5.33340 | 1.42964 |
| C | -1.83502 | -5.24311 | 1.40894 |
| C | 0.61666  | -5.25177 | 1.40580 |
| C | 3.08067  | -5.25697 | 1.40344 |
| C | 5.49031  | -5.42380 | 1.49738 |
| C | -5.48007 | -5.59232 | 0.69381 |
| C | -3.07075 | -5.39876 | 0.71546 |

|   |          |          |          |
|---|----------|----------|----------|
| C | -0.60695 | -5.39089 | 0.71089  |
| C | 1.84488  | -5.38073 | 0.70364  |
| C | 4.30313  | -5.46761 | 0.71871  |
| C | -5.48143 | -5.58999 | -0.68433 |
| C | -3.07211 | -5.39774 | -0.71116 |
| C | -0.60824 | -5.39097 | -0.71043 |
| C | 1.84371  | -5.38190 | -0.70708 |
| C | 4.30208  | -5.46797 | -0.72594 |
| C | -4.29579 | -5.33069 | -1.42244 |
| C | -1.83757 | -5.24253 | -1.40684 |
| C | 0.61442  | -5.25258 | -1.40707 |
| C | 3.07849  | -5.25794 | -1.40884 |
| C | 5.48819  | -5.42281 | -1.50651 |
| C | -4.29727 | -4.77837 | -2.75740 |
| C | -1.83885 | -4.70357 | -2.71051 |
| C | 0.61342  | -4.70803 | -2.71995 |
| C | 3.07767  | -4.70985 | -2.72595 |
| C | 5.48707  | -4.89509 | -2.77963 |
| C | -5.48458 | -4.44145 | -3.46128 |
| C | -3.07484 | -4.32292 | -3.31056 |
| C | -0.61057 | -4.31566 | -3.30952 |
| C | 1.84155  | -4.30237 | -3.30755 |
| C | 4.29976  | -4.37405 | -3.36004 |
| C | -5.48549 | -3.46953 | -4.43828 |
| C | -3.07606 | -3.31498 | -4.32025 |
| C | -0.61201 | -3.31062 | -4.31435 |
| C | 1.84020  | -3.30461 | -4.30489 |
| C | 4.29835  | -3.35150 | -4.38073 |
| C | -4.29944 | -2.76528 | -4.77839 |
| C | -1.84140 | -2.71338 | -4.70148 |
| C | 0.61045  | -2.71900 | -4.70799 |
| C | 3.07450  | -2.72002 | -4.71428 |
| C | 5.48384  | -2.76804 | -4.90322 |
| C | -4.30124 | -1.43013 | -5.33115 |
| C | -1.84337 | -1.40944 | -5.23984 |
| C | 0.60857  | -1.40536 | -5.25066 |
| C | 3.07239  | -1.40170 | -5.26034 |

|   |          |          |          |
|---|----------|----------|----------|
| C | 5.48160  | -1.49549 | -5.43259 |
| C | -5.48849 | -0.69405 | -5.59066 |
| C | -3.07938 | -0.71599 | -5.39552 |
| C | -0.61554 | -0.71101 | -5.38859 |
| C | 1.83606  | -0.70235 | -5.38122 |
| C | 4.29411  | -0.71643 | -5.47482 |
| C | -5.49056 | 0.68435  | -5.58884 |
| C | -3.08138 | 0.71075  | -5.39462 |
| C | -0.61742 | 0.71031  | -5.38818 |
| C | 1.83420  | 0.70836  | -5.38149 |
| C | 4.29196  | 0.72887  | -5.47594 |
| H | 6.42247  | 1.08806  | -5.75616 |
| H | 6.41952  | 3.31363  | -4.83975 |
| H | -6.43890 | 3.18801  | -4.88933 |
| H | -6.43887 | 4.88844  | -3.18673 |
| H | 6.42128  | 4.83340  | -3.30980 |
| H | 6.42301  | 5.74980  | -1.08485 |
| H | -6.43814 | 5.71049  | -1.19460 |
| H | -6.43445 | 5.71047  | 1.21147  |
| H | 6.42636  | 5.74728  | 1.06829  |
| H | 6.42992  | 4.82777  | 3.29224  |
| H | -6.43107 | 4.88709  | 3.20187  |
| H | -6.42711 | 3.18839  | 4.90611  |
| H | 6.43279  | 3.30298  | 4.81342  |
| H | 6.43626  | 1.08070  | 5.73584  |
| H | -6.42299 | 1.19919  | 5.73038  |
| H | -6.42239 | -1.20712 | 5.72850  |
| H | 6.43775  | -1.07492 | 5.73860  |
| H | 6.43850  | -3.29789 | 4.81718  |
| H | -6.42269 | -3.19825 | 4.90249  |
| H | -6.42359 | -4.89776 | 3.19851  |
| H | 6.43697  | -4.81866 | 3.29412  |
| H | 6.43579  | -5.73758 | 1.07027  |
| H | -6.42500 | -5.72179 | 1.20886  |
| H | -6.42744 | -5.71830 | -1.19762 |
| H | 6.43444  | -5.73728 | -1.08156 |
| H | 6.43240  | -4.81493 | -3.30381 |

|   |          |          |          |
|---|----------|----------|----------|
| H | -6.42975 | -4.89535 | -3.18705 |
| H | -6.43134 | -3.19802 | -4.89268 |
| H | 6.43035  | -3.29062 | -4.82609 |
| H | 6.42636  | -1.06916 | -5.74993 |
| H | -6.43318 | -1.20942 | -5.72020 |
| H | -6.43683 | 1.19729  | -5.71683 |
| O | 0.00000  | -0.00001 | -0.00001 |
| W | 2.01514  | 0.00000  | -1.16345 |
| W | -2.01515 | -0.00001 | 1.16344  |
| W | 1.16343  | 0.00000  | 2.01512  |
| W | -1.16343 | 0.00001  | -2.01512 |
| W | -0.00001 | -2.32686 | 0.00000  |
| W | 0.00001  | 2.32687  | -0.00000 |
| O | 1.63191  | 1.88435  | -0.94218 |
| O | -1.63188 | 1.88432  | 0.94218  |
| O | -1.63190 | -1.88435 | 0.94217  |
| O | 1.63189  | -1.88433 | -0.94218 |
| O | 0.68972  | -0.00000 | -2.57408 |
| O | 2.57407  | -0.00000 | 0.68972  |
| O | -0.68972 | -0.00002 | 2.57406  |
| O | -2.57407 | -0.00001 | -0.68972 |
| O | -0.94220 | -1.88437 | -1.63191 |
| O | 0.94218  | -1.88438 | 1.63192  |
| O | 0.94219  | 1.88438  | 1.63192  |
| O | -0.94219 | 1.88438  | -1.63191 |
| O | 2.02122  | 0.00005  | 3.50088  |
| O | -2.02125 | 0.00000  | -3.50086 |
| O | 0.00001  | 4.04246  | -0.00002 |
| O | 0.00000  | -4.04246 | 0.00003  |
| O | 3.50091  | 0.00002  | -2.02125 |
| O | -3.50091 | -0.00002 | 2.02125  |

**W<sub>6</sub>O<sub>19</sub><sup>2-</sup>@(8,8) h-CNT (y/z = 45°/0°)**

217

|   |          |         |          |
|---|----------|---------|----------|
| C | -4.30492 | 1.42279 | -5.32884 |
| C | -1.84686 | 1.40599 | -5.23837 |
| C | 0.60489  | 1.40776 | -5.25063 |



|   |          |         |          |
|---|----------|---------|----------|
| C | 3.06853  | 1.41116 | -5.26147 |
| C | 5.47690  | 1.51187 | -5.43810 |
| C | -4.30631 | 2.75755 | -4.77487 |
| C | -1.84825 | 2.70933 | -4.69881 |
| C | 0.60347  | 2.72095 | -4.70735 |
| C | 3.06709  | 2.72975 | -4.71697 |
| C | 5.47524  | 2.78648 | -4.91323 |
| C | -5.49321 | 3.46066 | -4.43525 |
| C | -3.08381 | 3.30912 | -4.31728 |
| C | -0.62004 | 3.30923 | -4.31225 |
| C | 1.83186  | 3.31044 | -4.30597 |
| C | 4.28923  | 3.36592 | -4.38752 |
| C | -5.49317 | 4.43489 | -3.46026 |
| C | -3.08374 | 4.31783 | -3.30835 |
| C | -0.62001 | 4.31537 | -3.30851 |
| C | 1.83175  | 4.30859 | -3.30933 |
| C | 4.28952  | 4.38688 | -3.36491 |
| C | -4.30656 | 4.77367 | -2.75649 |
| C | -1.84841 | 4.70145 | -2.70903 |
| C | 0.60341  | 4.71146 | -2.72066 |
| C | 3.06729  | 4.71865 | -2.72900 |
| C | 5.47638  | 4.90874 | -2.78409 |
| C | -4.30573 | 5.32580 | -1.42098 |
| C | -1.84727 | 5.24066 | -1.40552 |
| C | 0.60450  | 5.25403 | -1.40707 |
| C | 3.06841  | 5.26287 | -1.41030 |
| C | 5.47739  | 5.43350 | -1.50982 |
| C | -5.49160 | 5.58314 | -0.68197 |
| C | -3.08190 | 5.39401 | -0.70960 |
| C | -0.61782 | 5.39031 | -0.70989 |
| C | 1.83403  | 5.38428 | -0.70757 |
| C | 4.29213  | 5.47355 | -0.72798 |
| C | -5.48939 | 5.58319 | 0.69610  |
| C | -3.07991 | 5.39336 | 0.71720  |
| C | -0.61585 | 5.38964 | 0.71145  |
| C | 1.83580  | 5.38343 | 0.70305  |
| C | 4.29400  | 5.47258 | 0.71679  |

|   |          |          |         |
|---|----------|----------|---------|
| C | -4.30176 | 5.32594  | 1.43173 |
| C | -1.84357 | 5.23931  | 1.41004 |
| C | 0.60816  | 5.25225  | 1.40546 |
| C | 3.07206  | 5.26124  | 1.40230 |
| C | 5.48165  | 5.43084  | 1.49523 |
| C | -4.29962 | 4.77238  | 2.76646 |
| C | -1.84134 | 4.69988  | 2.71369 |
| C | 0.61046  | 4.70728  | 2.71811 |
| C | 3.07424  | 4.71503  | 2.72027 |
| C | 5.48374  | 4.90443  | 2.76894 |
| C | -5.48473 | 4.43360  | 3.47317 |
| C | -3.07539 | 4.31763  | 3.31642 |
| C | -0.61146 | 4.31279  | 3.30999 |
| C | 1.84017  | 4.30413  | 3.30370 |
| C | 4.29822  | 4.38172  | 3.35198 |
| C | -5.48254 | 3.46099  | 4.44958 |
| C | -3.07286 | 3.30948  | 4.32597 |
| C | -0.60906 | 3.30799  | 4.31532 |
| C | 1.84230  | 3.30648  | 4.30118 |
| C | 4.30032  | 3.35873  | 4.37240 |
| C | -4.29452 | 2.75816  | 4.78625 |
| C | -1.83664 | 2.70922  | 4.70535 |
| C | 0.61480  | 2.71839  | 4.70760 |
| C | 3.07845  | 2.72456  | 4.70786 |
| C | 5.48790  | 2.77789  | 4.89254 |
| C | -4.29209 | 1.42316  | 5.33900 |
| C | -1.83470 | 1.40552  | 5.24437 |
| C | 0.61664  | 1.40540  | 5.25220 |
| C | 3.08048  | 1.40636  | 5.25366 |
| C | 5.48985  | 1.50493  | 5.42082 |
| C | -5.47754 | 0.68550  | 5.59987 |
| C | -3.06919 | 0.71055  | 5.40178 |
| C | -0.60571 | 0.70885  | 5.39230 |
| C | 1.84593  | 0.70460  | 5.37929 |
| C | 4.30417  | 0.72353  | 5.46523 |
| C | -5.47719 | -0.69272 | 5.59886 |
| C | -3.06856 | -0.71631 | 5.40116 |

|   |          |          |         |
|---|----------|----------|---------|
| C | -0.60484 | -0.71251 | 5.39188 |
| C | 1.84687  | -0.70616 | 5.38040 |
| C | 4.30530  | -0.72143 | 5.46684 |
| C | -4.29111 | -1.42970 | 5.33722 |
| C | -1.83322 | -1.41046 | 5.24440 |
| C | 0.61848  | -1.40765 | 5.25259 |
| C | 3.08275  | -1.40632 | 5.25668 |
| C | 5.49216  | -1.50137 | 5.42410 |
| C | -4.29104 | -2.76477 | 4.78395 |
| C | -1.83299 | -2.71379 | 4.70457 |
| C | 0.61877  | -2.72063 | 4.70851 |
| C | 3.08306  | -2.72461 | 4.71146 |
| C | 5.49261  | -2.77447 | 4.89610 |
| C | -5.47753 | -3.46988 | 4.44663 |
| C | -3.06854 | -3.31486 | 4.32442 |
| C | -0.60446 | -3.31106 | 4.31512 |
| C | 1.84757  | -3.30743 | 4.30373 |
| C | 4.30572  | -3.35729 | 4.37663 |
| C | -5.47802 | -4.44296 | 3.47029 |
| C | -3.06910 | -4.32254 | 3.31424 |
| C | -0.60521 | -4.31588 | 3.31005 |
| C | 1.84678  | -4.30426 | 3.30554 |
| C | 4.30463  | -4.37834 | 3.35454 |
| C | -4.29214 | -4.78040 | 2.76454 |
| C | -1.83428 | -4.70336 | 2.71222 |
| C | 0.61763  | -4.70864 | 2.71930 |
| C | 3.08153  | -4.71206 | 2.72181 |
| C | 5.49093  | -4.89773 | 2.77107 |
| C | -4.29283 | -5.33340 | 1.42964 |
| C | -1.83502 | -5.24311 | 1.40894 |
| C | 0.61666  | -5.25177 | 1.40580 |
| C | 3.08067  | -5.25697 | 1.40344 |
| C | 5.49031  | -5.42380 | 1.49738 |
| C | -5.48007 | -5.59232 | 0.69381 |
| C | -3.07075 | -5.39876 | 0.71546 |
| C | -0.60695 | -5.39089 | 0.71089 |
| C | 1.84488  | -5.38073 | 0.70364 |

|   |          |          |          |
|---|----------|----------|----------|
| C | 4.30313  | -5.46761 | 0.71871  |
| C | -5.48143 | -5.58999 | -0.68433 |
| C | -3.07211 | -5.39774 | -0.71116 |
| C | -0.60824 | -5.39097 | -0.71043 |
| C | 1.84371  | -5.38190 | -0.70708 |
| C | 4.30208  | -5.46797 | -0.72594 |
| C | -4.29579 | -5.33069 | -1.42244 |
| C | -1.83757 | -5.24253 | -1.40684 |
| C | 0.61442  | -5.25258 | -1.40707 |
| C | 3.07849  | -5.25794 | -1.40884 |
| C | 5.48819  | -5.42281 | -1.50651 |
| C | -4.29727 | -4.77837 | -2.75740 |
| C | -1.83885 | -4.70357 | -2.71051 |
| C | 0.61342  | -4.70803 | -2.71995 |
| C | 3.07767  | -4.70985 | -2.72595 |
| C | 5.48707  | -4.89509 | -2.77963 |
| C | -5.48458 | -4.44145 | -3.46128 |
| C | -3.07484 | -4.32292 | -3.31056 |
| C | -0.61057 | -4.31566 | -3.30952 |
| C | 1.84155  | -4.30237 | -3.30755 |
| C | 4.29976  | -4.37405 | -3.36004 |
| C | -5.48549 | -3.46953 | -4.43828 |
| C | -3.07606 | -3.31498 | -4.32025 |
| C | -0.61201 | -3.31062 | -4.31435 |
| C | 1.84020  | -3.30461 | -4.30489 |
| C | 4.29835  | -3.35150 | -4.38073 |
| C | -4.29944 | -2.76528 | -4.77839 |
| C | -1.84140 | -2.71338 | -4.70148 |
| C | 0.61045  | -2.71900 | -4.70799 |
| C | 3.07450  | -2.72002 | -4.71428 |
| C | 5.48384  | -2.76804 | -4.90322 |
| C | -4.30124 | -1.43013 | -5.33115 |
| C | -1.84337 | -1.40944 | -5.23984 |
| C | 0.60857  | -1.40536 | -5.25066 |
| C | 3.07239  | -1.40170 | -5.26034 |
| C | 5.48160  | -1.49549 | -5.43259 |
| C | -5.48849 | -0.69405 | -5.59066 |

|   |          |          |          |
|---|----------|----------|----------|
| C | -3.07938 | -0.71599 | -5.39552 |
| C | -0.61554 | -0.71101 | -5.38859 |
| C | 1.83606  | -0.70235 | -5.38122 |
| C | 4.29411  | -0.71643 | -5.47482 |
| C | -5.49056 | 0.68435  | -5.58884 |
| C | -3.08138 | 0.71075  | -5.39462 |
| C | -0.61742 | 0.71031  | -5.38818 |
| C | 1.83420  | 0.70836  | -5.38149 |
| C | 4.29196  | 0.72887  | -5.47594 |
| H | 6.42247  | 1.08806  | -5.75616 |
| H | 6.41952  | 3.31363  | -4.83975 |
| H | -6.43890 | 3.18801  | -4.88933 |
| H | -6.43887 | 4.88844  | -3.18673 |
| H | 6.42128  | 4.83340  | -3.30980 |
| H | 6.42301  | 5.74980  | -1.08485 |
| H | -6.43814 | 5.71049  | -1.19460 |
| H | -6.43445 | 5.71047  | 1.21147  |
| H | 6.42636  | 5.74728  | 1.06829  |
| H | 6.42992  | 4.82777  | 3.29224  |
| H | -6.43107 | 4.88709  | 3.20187  |
| H | -6.42711 | 3.18839  | 4.90611  |
| H | 6.43279  | 3.30298  | 4.81342  |
| H | 6.43626  | 1.08070  | 5.73584  |
| H | -6.42299 | 1.19919  | 5.73038  |
| H | -6.42239 | -1.20712 | 5.72850  |
| H | 6.43775  | -1.07492 | 5.73860  |
| H | 6.43850  | -3.29789 | 4.81718  |
| H | -6.42269 | -3.19825 | 4.90249  |
| H | -6.42359 | -4.89776 | 3.19851  |
| H | 6.43697  | -4.81866 | 3.29412  |
| H | 6.43579  | -5.73758 | 1.07027  |
| H | -6.42500 | -5.72179 | 1.20886  |
| H | -6.42744 | -5.71830 | -1.19762 |
| H | 6.43444  | -5.73728 | -1.08156 |
| H | 6.43240  | -4.81493 | -3.30381 |
| H | -6.42975 | -4.89535 | -3.18705 |
| H | -6.43134 | -3.19802 | -4.89268 |

|   |          |          |          |
|---|----------|----------|----------|
| H | 6.43035  | -3.29062 | -4.82609 |
| H | 6.42636  | -1.06916 | -5.74993 |
| H | -6.43318 | -1.20942 | -5.72020 |
| H | -6.43683 | 1.19729  | -5.71683 |
| O | -0.00000 | -0.00001 | -0.00001 |
| W | 1.64535  | 0.00000  | -1.64536 |
| W | -1.64536 | -0.00001 | 1.64535  |
| W | 1.64534  | 0.00000  | 1.64534  |
| W | -1.64534 | 0.00001  | -1.64534 |
| W | -0.00000 | -2.32686 | 0.00000  |
| W | 0.00001  | 2.32687  | -0.00001 |
| O | 1.33245  | 1.88435  | -1.33244 |
| O | -1.33242 | 1.88432  | 1.33243  |
| O | -1.33245 | -1.88435 | 1.33243  |
| O | 1.33243  | -1.88433 | -1.33244 |
| O | -0.00001 | -0.00000 | -2.66488 |
| O | 2.66487  | -0.00000 | -0.00000 |
| O | 0.00000  | -0.00002 | 2.66487  |
| O | -2.66487 | -0.00001 | 0.00000  |
| O | -1.33246 | -1.88437 | -1.33244 |
| O | 1.33245  | -1.88438 | 1.33246  |
| O | 1.33246  | 1.88438  | 1.33246  |
| O | -1.33245 | 1.88438  | -1.33245 |
| O | 2.85844  | 0.00005  | 2.85846  |
| O | -2.85847 | 0.00000  | -2.85843 |
| O | 0.00000  | 4.04246  | -0.00002 |
| O | 0.00001  | -4.04246 | 0.00003  |
| O | 2.85848  | 0.00002  | -2.85848 |
| O | -2.85848 | -0.00002 | 2.85848  |

**W<sub>6</sub>O<sub>19</sub><sup>2-</sup>@(8,8) h-CNT (y/z = 45°/15°)**

217

|   |          |         |          |
|---|----------|---------|----------|
| C | -4.30492 | 1.42279 | -5.32884 |
| C | -1.84686 | 1.40599 | -5.23837 |
| C | 0.60489  | 1.40776 | -5.25063 |
| C | 3.06853  | 1.41116 | -5.26147 |
| C | 5.47690  | 1.51187 | -5.43810 |

|   |          |         |          |
|---|----------|---------|----------|
| C | -4.30631 | 2.75755 | -4.77487 |
| C | -1.84825 | 2.70933 | -4.69881 |
| C | 0.60347  | 2.72095 | -4.70735 |
| C | 3.06709  | 2.72975 | -4.71697 |
| C | 5.47524  | 2.78648 | -4.91323 |
| C | -5.49321 | 3.46066 | -4.43525 |
| C | -3.08381 | 3.30912 | -4.31728 |
| C | -0.62004 | 3.30923 | -4.31225 |
| C | 1.83186  | 3.31044 | -4.30597 |
| C | 4.28923  | 3.36592 | -4.38752 |
| C | -5.49317 | 4.43489 | -3.46026 |
| C | -3.08374 | 4.31783 | -3.30835 |
| C | -0.62001 | 4.31537 | -3.30851 |
| C | 1.83175  | 4.30859 | -3.30933 |
| C | 4.28952  | 4.38688 | -3.36491 |
| C | -4.30656 | 4.77367 | -2.75649 |
| C | -1.84841 | 4.70145 | -2.70903 |
| C | 0.60341  | 4.71146 | -2.72066 |
| C | 3.06729  | 4.71865 | -2.72900 |
| C | 5.47638  | 4.90874 | -2.78409 |
| C | -4.30573 | 5.32580 | -1.42098 |
| C | -1.84727 | 5.24066 | -1.40552 |
| C | 0.60450  | 5.25403 | -1.40707 |
| C | 3.06841  | 5.26287 | -1.41030 |
| C | 5.47739  | 5.43350 | -1.50982 |
| C | -5.49160 | 5.58314 | -0.68197 |
| C | -3.08190 | 5.39401 | -0.70960 |
| C | -0.61782 | 5.39031 | -0.70989 |
| C | 1.83403  | 5.38428 | -0.70757 |
| C | 4.29213  | 5.47355 | -0.72798 |
| C | -5.48939 | 5.58319 | 0.69610  |
| C | -3.07991 | 5.39336 | 0.71720  |
| C | -0.61585 | 5.38964 | 0.71145  |
| C | 1.83580  | 5.38343 | 0.70305  |
| C | 4.29400  | 5.47258 | 0.71679  |
| C | -4.30176 | 5.32594 | 1.43173  |
| C | -1.84357 | 5.23931 | 1.41004  |

|   |          |          |         |
|---|----------|----------|---------|
| C | 0.60816  | 5.25225  | 1.40546 |
| C | 3.07206  | 5.26124  | 1.40230 |
| C | 5.48165  | 5.43084  | 1.49523 |
| C | -4.29962 | 4.77238  | 2.76646 |
| C | -1.84134 | 4.69988  | 2.71369 |
| C | 0.61046  | 4.70728  | 2.71811 |
| C | 3.07424  | 4.71503  | 2.72027 |
| C | 5.48374  | 4.90443  | 2.76894 |
| C | -5.48473 | 4.43360  | 3.47317 |
| C | -3.07539 | 4.31763  | 3.31642 |
| C | -0.61146 | 4.31279  | 3.30999 |
| C | 1.84017  | 4.30413  | 3.30370 |
| C | 4.29822  | 4.38172  | 3.35198 |
| C | -5.48254 | 3.46099  | 4.44958 |
| C | -3.07286 | 3.30948  | 4.32597 |
| C | -0.60906 | 3.30799  | 4.31532 |
| C | 1.84230  | 3.30648  | 4.30118 |
| C | 4.30032  | 3.35873  | 4.37240 |
| C | -4.29452 | 2.75816  | 4.78625 |
| C | -1.83664 | 2.70922  | 4.70535 |
| C | 0.61480  | 2.71839  | 4.70760 |
| C | 3.07845  | 2.72456  | 4.70786 |
| C | 5.48790  | 2.77789  | 4.89254 |
| C | -4.29209 | 1.42316  | 5.33900 |
| C | -1.83470 | 1.40552  | 5.24437 |
| C | 0.61664  | 1.40540  | 5.25220 |
| C | 3.08048  | 1.40636  | 5.25366 |
| C | 5.48985  | 1.50493  | 5.42082 |
| C | -5.47754 | 0.68550  | 5.59987 |
| C | -3.06919 | 0.71055  | 5.40178 |
| C | -0.60571 | 0.70885  | 5.39230 |
| C | 1.84593  | 0.70460  | 5.37929 |
| C | 4.30417  | 0.72353  | 5.46523 |
| C | -5.47719 | -0.69272 | 5.59886 |
| C | -3.06856 | -0.71631 | 5.40116 |
| C | -0.60484 | -0.71251 | 5.39188 |
| C | 1.84687  | -0.70616 | 5.38040 |



|   |          |          |          |
|---|----------|----------|----------|
| C | 4.30530  | -0.72143 | 5.46684  |
| C | -4.29111 | -1.42970 | 5.33722  |
| C | -1.83322 | -1.41046 | 5.24440  |
| C | 0.61848  | -1.40765 | 5.25259  |
| C | 3.08275  | -1.40632 | 5.25668  |
| C | 5.49216  | -1.50137 | 5.42410  |
| C | -4.29104 | -2.76477 | 4.78395  |
| C | -1.83299 | -2.71379 | 4.70457  |
| C | 0.61877  | -2.72063 | 4.70851  |
| C | 3.08306  | -2.72461 | 4.71146  |
| C | 5.49261  | -2.77447 | 4.89610  |
| C | -5.47753 | -3.46988 | 4.44663  |
| C | -3.06854 | -3.31486 | 4.32442  |
| C | -0.60446 | -3.31106 | 4.31512  |
| C | 1.84757  | -3.30743 | 4.30373  |
| C | 4.30572  | -3.35729 | 4.37663  |
| C | -5.47802 | -4.44296 | 3.47029  |
| C | -3.06910 | -4.32254 | 3.31424  |
| C | -0.60521 | -4.31588 | 3.31005  |
| C | 1.84678  | -4.30426 | 3.30554  |
| C | 4.30463  | -4.37834 | 3.35454  |
| C | -4.29214 | -4.78040 | 2.76454  |
| C | -1.83428 | -4.70336 | 2.71222  |
| C | 0.61763  | -4.70864 | 2.71930  |
| C | 3.08153  | -4.71206 | 2.72181  |
| C | 5.49093  | -4.89773 | 2.77107  |
| C | -4.29283 | -5.33340 | 1.42964  |
| C | -1.83502 | -5.24311 | 1.40894  |
| C | 0.61666  | -5.25177 | 1.40580  |
| C | 3.08067  | -5.25697 | 1.40344  |
| C | 5.49031  | -5.42380 | 1.49738  |
| C | -5.48007 | -5.59232 | 0.69381  |
| C | -3.07075 | -5.39876 | 0.71546  |
| C | -0.60695 | -5.39089 | 0.71089  |
| C | 1.84488  | -5.38073 | 0.70364  |
| C | 4.30313  | -5.46761 | 0.71871  |
| C | -5.48143 | -5.58999 | -0.68433 |

|   |          |          |          |
|---|----------|----------|----------|
| C | -3.07211 | -5.39774 | -0.71116 |
| C | -0.60824 | -5.39097 | -0.71043 |
| C | 1.84371  | -5.38190 | -0.70708 |
| C | 4.30208  | -5.46797 | -0.72594 |
| C | -4.29579 | -5.33069 | -1.42244 |
| C | -1.83757 | -5.24253 | -1.40684 |
| C | 0.61442  | -5.25258 | -1.40707 |
| C | 3.07849  | -5.25794 | -1.40884 |
| C | 5.48819  | -5.42281 | -1.50651 |
| C | -4.29727 | -4.77837 | -2.75740 |
| C | -1.83885 | -4.70357 | -2.71051 |
| C | 0.61342  | -4.70803 | -2.71995 |
| C | 3.07767  | -4.70985 | -2.72595 |
| C | 5.48707  | -4.89509 | -2.77963 |
| C | -5.48458 | -4.44145 | -3.46128 |
| C | -3.07484 | -4.32292 | -3.31056 |
| C | -0.61057 | -4.31566 | -3.30952 |
| C | 1.84155  | -4.30237 | -3.30755 |
| C | 4.29976  | -4.37405 | -3.36004 |
| C | -5.48549 | -3.46953 | -4.43828 |
| C | -3.07606 | -3.31498 | -4.32025 |
| C | -0.61201 | -3.31062 | -4.31435 |
| C | 1.84020  | -3.30461 | -4.30489 |
| C | 4.29835  | -3.35150 | -4.38073 |
| C | -4.29944 | -2.76528 | -4.77839 |
| C | -1.84140 | -2.71338 | -4.70148 |
| C | 0.61045  | -2.71900 | -4.70799 |
| C | 3.07450  | -2.72002 | -4.71428 |
| C | 5.48384  | -2.76804 | -4.90322 |
| C | -4.30124 | -1.43013 | -5.33115 |
| C | -1.84337 | -1.40944 | -5.23984 |
| C | 0.60857  | -1.40536 | -5.25066 |
| C | 3.07239  | -1.40170 | -5.26034 |
| C | 5.48160  | -1.49549 | -5.43259 |
| C | -5.48849 | -0.69405 | -5.59066 |
| C | -3.07938 | -0.71599 | -5.39552 |
| C | -0.61554 | -0.71101 | -5.38859 |

|   |          |          |          |
|---|----------|----------|----------|
| C | 1.83606  | -0.70235 | -5.38122 |
| C | 4.29411  | -0.71643 | -5.47482 |
| C | -5.49056 | 0.68435  | -5.58884 |
| C | -3.08138 | 0.71075  | -5.39462 |
| C | -0.61742 | 0.71031  | -5.38818 |
| C | 1.83420  | 0.70836  | -5.38149 |
| C | 4.29196  | 0.72887  | -5.47594 |
| H | 6.42247  | 1.08806  | -5.75616 |
| H | 6.41952  | 3.31363  | -4.83975 |
| H | -6.43890 | 3.18801  | -4.88933 |
| H | -6.43887 | 4.88844  | -3.18673 |
| H | 6.42128  | 4.83340  | -3.30980 |
| H | 6.42301  | 5.74980  | -1.08485 |
| H | -6.43814 | 5.71049  | -1.19460 |
| H | -6.43445 | 5.71047  | 1.21147  |
| H | 6.42636  | 5.74728  | 1.06829  |
| H | 6.42992  | 4.82777  | 3.29224  |
| H | -6.43107 | 4.88709  | 3.20187  |
| H | -6.42711 | 3.18839  | 4.90611  |
| H | 6.43279  | 3.30298  | 4.81342  |
| H | 6.43626  | 1.08070  | 5.73584  |
| H | -6.42299 | 1.19919  | 5.73038  |
| H | -6.42239 | -1.20712 | 5.72850  |
| H | 6.43775  | -1.07492 | 5.73860  |
| H | 6.43850  | -3.29789 | 4.81718  |
| H | -6.42269 | -3.19825 | 4.90249  |
| H | -6.42359 | -4.89776 | 3.19851  |
| H | 6.43697  | -4.81866 | 3.29412  |
| H | 6.43579  | -5.73758 | 1.07027  |
| H | -6.42500 | -5.72179 | 1.20886  |
| H | -6.42744 | -5.71830 | -1.19762 |
| H | 6.43444  | -5.73728 | -1.08156 |
| H | 6.43240  | -4.81493 | -3.30381 |
| H | -6.42975 | -4.89535 | -3.18705 |
| H | -6.43134 | -3.19802 | -4.89268 |
| H | 6.43035  | -3.29062 | -4.82609 |
| H | 6.42636  | -1.06916 | -5.74993 |

|   |          |          |          |
|---|----------|----------|----------|
| H | -6.43318 | -1.20942 | -5.72020 |
| H | -6.43683 | 1.19729  | -5.71683 |
| O | -0.00000 | -0.00000 | -0.00001 |
| W | 1.58929  | -0.42585 | -1.64536 |
| W | -1.58930 | 0.42584  | 1.64535  |
| W | 1.58928  | -0.42584 | 1.64534  |
| W | -1.58928 | 0.42585  | -1.64534 |
| W | -0.60224 | -2.24758 | 0.00000  |
| W | 0.60225  | 2.24758  | -0.00001 |
| O | 1.77475  | 1.47528  | -1.33244 |
| O | -0.79932 | 2.16497  | 1.33243  |
| O | -1.77475 | -1.47528 | 1.33244  |
| O | 0.79932  | -2.16498 | -1.33244 |
| O | -0.00001 | -0.00000 | -2.66488 |
| O | 2.57407  | -0.68972 | -0.00000 |
| O | -0.00000 | -0.00002 | 2.66487  |
| O | -2.57407 | 0.68971  | 0.00000  |
| O | -1.77477 | -1.47530 | -1.33244 |
| O | 0.79934  | -2.16504 | 1.33246  |
| O | 1.77477  | 1.47531  | 1.33245  |
| O | -0.79934 | 2.16504  | -1.33245 |
| O | 2.76106  | -0.73978 | 2.85846  |
| O | -2.76107 | 0.73983  | -2.85843 |
| O | 1.04627  | 3.90472  | -0.00002 |
| O | -1.04625 | -3.90472 | 0.00003  |
| O | 2.76108  | -0.73981 | -2.85848 |
| O | -2.76108 | 0.73981  | 2.85848  |

**W<sub>6</sub>O<sub>19</sub><sup>2-</sup>@(8,8) h-CNT (y/z = 45°/30°)**

217

|   |          |         |          |
|---|----------|---------|----------|
| C | -4.30492 | 1.42279 | -5.32884 |
| C | -1.84686 | 1.40599 | -5.23837 |
| C | 0.60489  | 1.40776 | -5.25063 |
| C | 3.06853  | 1.41116 | -5.26147 |
| C | 5.47690  | 1.51187 | -5.43810 |
| C | -4.30631 | 2.75755 | -4.77487 |
| C | -1.84825 | 2.70933 | -4.69881 |

|   |          |         |          |
|---|----------|---------|----------|
| C | 0.60347  | 2.72095 | -4.70735 |
| C | 3.06709  | 2.72975 | -4.71697 |
| C | 5.47524  | 2.78648 | -4.91323 |
| C | -5.49321 | 3.46066 | -4.43525 |
| C | -3.08381 | 3.30912 | -4.31728 |
| C | -0.62004 | 3.30923 | -4.31225 |
| C | 1.83186  | 3.31044 | -4.30597 |
| C | 4.28923  | 3.36592 | -4.38752 |
| C | -5.49317 | 4.43489 | -3.46026 |
| C | -3.08374 | 4.31783 | -3.30835 |
| C | -0.62001 | 4.31537 | -3.30851 |
| C | 1.83175  | 4.30859 | -3.30933 |
| C | 4.28952  | 4.38688 | -3.36491 |
| C | -4.30656 | 4.77367 | -2.75649 |
| C | -1.84841 | 4.70145 | -2.70903 |
| C | 0.60341  | 4.71146 | -2.72066 |
| C | 3.06729  | 4.71865 | -2.72900 |
| C | 5.47638  | 4.90874 | -2.78409 |
| C | -4.30573 | 5.32580 | -1.42098 |
| C | -1.84727 | 5.24066 | -1.40552 |
| C | 0.60450  | 5.25403 | -1.40707 |
| C | 3.06841  | 5.26287 | -1.41030 |
| C | 5.47739  | 5.43350 | -1.50982 |
| C | -5.49160 | 5.58314 | -0.68197 |
| C | -3.08190 | 5.39401 | -0.70960 |
| C | -0.61782 | 5.39031 | -0.70989 |
| C | 1.83403  | 5.38428 | -0.70757 |
| C | 4.29213  | 5.47355 | -0.72798 |
| C | -5.48939 | 5.58319 | 0.69610  |
| C | -3.07991 | 5.39336 | 0.71720  |
| C | -0.61585 | 5.38964 | 0.71145  |
| C | 1.83580  | 5.38343 | 0.70305  |
| C | 4.29400  | 5.47258 | 0.71679  |
| C | -4.30176 | 5.32594 | 1.43173  |
| C | -1.84357 | 5.23931 | 1.41004  |
| C | 0.60816  | 5.25225 | 1.40546  |
| C | 3.07206  | 5.26124 | 1.40230  |

|   |          |          |         |
|---|----------|----------|---------|
| C | 5.48165  | 5.43084  | 1.49523 |
| C | -4.29962 | 4.77238  | 2.76646 |
| C | -1.84134 | 4.69988  | 2.71369 |
| C | 0.61046  | 4.70728  | 2.71811 |
| C | 3.07424  | 4.71503  | 2.72027 |
| C | 5.48374  | 4.90443  | 2.76894 |
| C | -5.48473 | 4.43360  | 3.47317 |
| C | -3.07539 | 4.31763  | 3.31642 |
| C | -0.61146 | 4.31279  | 3.30999 |
| C | 1.84017  | 4.30413  | 3.30370 |
| C | 4.29822  | 4.38172  | 3.35198 |
| C | -5.48254 | 3.46099  | 4.44958 |
| C | -3.07286 | 3.30948  | 4.32597 |
| C | -0.60906 | 3.30799  | 4.31532 |
| C | 1.84230  | 3.30648  | 4.30118 |
| C | 4.30032  | 3.35873  | 4.37240 |
| C | -4.29452 | 2.75816  | 4.78625 |
| C | -1.83664 | 2.70922  | 4.70535 |
| C | 0.61480  | 2.71839  | 4.70760 |
| C | 3.07845  | 2.72456  | 4.70786 |
| C | 5.48790  | 2.77789  | 4.89254 |
| C | -4.29209 | 1.42316  | 5.33900 |
| C | -1.83470 | 1.40552  | 5.24437 |
| C | 0.61664  | 1.40540  | 5.25220 |
| C | 3.08048  | 1.40636  | 5.25366 |
| C | 5.48985  | 1.50493  | 5.42082 |
| C | -5.47754 | 0.68550  | 5.59987 |
| C | -3.06919 | 0.71055  | 5.40178 |
| C | -0.60571 | 0.70885  | 5.39230 |
| C | 1.84593  | 0.70460  | 5.37929 |
| C | 4.30417  | 0.72353  | 5.46523 |
| C | -5.47719 | -0.69272 | 5.59886 |
| C | -3.06856 | -0.71631 | 5.40116 |
| C | -0.60484 | -0.71251 | 5.39188 |
| C | 1.84687  | -0.70616 | 5.38040 |
| C | 4.30530  | -0.72143 | 5.46684 |
| C | -4.29111 | -1.42970 | 5.33722 |

|   |          |          |          |
|---|----------|----------|----------|
| C | -1.83322 | -1.41046 | 5.24440  |
| C | 0.61848  | -1.40765 | 5.25259  |
| C | 3.08275  | -1.40632 | 5.25668  |
| C | 5.49216  | -1.50137 | 5.42410  |
| C | -4.29104 | -2.76477 | 4.78395  |
| C | -1.83299 | -2.71379 | 4.70457  |
| C | 0.61877  | -2.72063 | 4.70851  |
| C | 3.08306  | -2.72461 | 4.71146  |
| C | 5.49261  | -2.77447 | 4.89610  |
| C | -5.47753 | -3.46988 | 4.44663  |
| C | -3.06854 | -3.31486 | 4.32442  |
| C | -0.60446 | -3.31106 | 4.31512  |
| C | 1.84757  | -3.30743 | 4.30373  |
| C | 4.30572  | -3.35729 | 4.37663  |
| C | -5.47802 | -4.44296 | 3.47029  |
| C | -3.06910 | -4.32254 | 3.31424  |
| C | -0.60521 | -4.31588 | 3.31005  |
| C | 1.84678  | -4.30426 | 3.30554  |
| C | 4.30463  | -4.37834 | 3.35454  |
| C | -4.29214 | -4.78040 | 2.76454  |
| C | -1.83428 | -4.70336 | 2.71222  |
| C | 0.61763  | -4.70864 | 2.71930  |
| C | 3.08153  | -4.71206 | 2.72181  |
| C | 5.49093  | -4.89773 | 2.77107  |
| C | -4.29283 | -5.33340 | 1.42964  |
| C | -1.83502 | -5.24311 | 1.40894  |
| C | 0.61666  | -5.25177 | 1.40580  |
| C | 3.08067  | -5.25697 | 1.40344  |
| C | 5.49031  | -5.42380 | 1.49738  |
| C | -5.48007 | -5.59232 | 0.69381  |
| C | -3.07075 | -5.39876 | 0.71546  |
| C | -0.60695 | -5.39089 | 0.71089  |
| C | 1.84488  | -5.38073 | 0.70364  |
| C | 4.30313  | -5.46761 | 0.71871  |
| C | -5.48143 | -5.58999 | -0.68433 |
| C | -3.07211 | -5.39774 | -0.71116 |
| C | -0.60824 | -5.39097 | -0.71043 |

|   |          |          |          |
|---|----------|----------|----------|
| C | 1.84371  | -5.38190 | -0.70708 |
| C | 4.30208  | -5.46797 | -0.72594 |
| C | -4.29579 | -5.33069 | -1.42244 |
| C | -1.83757 | -5.24253 | -1.40684 |
| C | 0.61442  | -5.25258 | -1.40707 |
| C | 3.07849  | -5.25794 | -1.40884 |
| C | 5.48819  | -5.42281 | -1.50651 |
| C | -4.29727 | -4.77837 | -2.75740 |
| C | -1.83885 | -4.70357 | -2.71051 |
| C | 0.61342  | -4.70803 | -2.71995 |
| C | 3.07767  | -4.70985 | -2.72595 |
| C | 5.48707  | -4.89509 | -2.77963 |
| C | -5.48458 | -4.44145 | -3.46128 |
| C | -3.07484 | -4.32292 | -3.31056 |
| C | -0.61057 | -4.31566 | -3.30952 |
| C | 1.84155  | -4.30237 | -3.30755 |
| C | 4.29976  | -4.37405 | -3.36004 |
| C | -5.48549 | -3.46953 | -4.43828 |
| C | -3.07606 | -3.31498 | -4.32025 |
| C | -0.61201 | -3.31062 | -4.31435 |
| C | 1.84020  | -3.30461 | -4.30489 |
| C | 4.29835  | -3.35150 | -4.38073 |
| C | -4.29944 | -2.76528 | -4.77839 |
| C | -1.84140 | -2.71338 | -4.70148 |
| C | 0.61045  | -2.71900 | -4.70799 |
| C | 3.07450  | -2.72002 | -4.71428 |
| C | 5.48384  | -2.76804 | -4.90322 |
| C | -4.30124 | -1.43013 | -5.33115 |
| C | -1.84337 | -1.40944 | -5.23984 |
| C | 0.60857  | -1.40536 | -5.25066 |
| C | 3.07239  | -1.40170 | -5.26034 |
| C | 5.48160  | -1.49549 | -5.43259 |
| C | -5.48849 | -0.69405 | -5.59066 |
| C | -3.07938 | -0.71599 | -5.39552 |
| C | -0.61554 | -0.71101 | -5.38859 |
| C | 1.83606  | -0.70235 | -5.38122 |
| C | 4.29411  | -0.71643 | -5.47482 |



|   |          |          |          |
|---|----------|----------|----------|
| C | -5.49056 | 0.68435  | -5.58884 |
| C | -3.08138 | 0.71075  | -5.39462 |
| C | -0.61742 | 0.71031  | -5.38818 |
| C | 1.83420  | 0.70836  | -5.38149 |
| C | 4.29196  | 0.72887  | -5.47594 |
| H | 6.42247  | 1.08806  | -5.75616 |
| H | 6.41952  | 3.31363  | -4.83975 |
| H | -6.43890 | 3.18801  | -4.88933 |
| H | -6.43887 | 4.88844  | -3.18673 |
| H | 6.42128  | 4.83340  | -3.30980 |
| H | 6.42301  | 5.74980  | -1.08485 |
| H | -6.43814 | 5.71049  | -1.19460 |
| H | -6.43445 | 5.71047  | 1.21147  |
| H | 6.42636  | 5.74728  | 1.06829  |
| H | 6.42992  | 4.82777  | 3.29224  |
| H | -6.43107 | 4.88709  | 3.20187  |
| H | -6.42711 | 3.18839  | 4.90611  |
| H | 6.43279  | 3.30298  | 4.81342  |
| H | 6.43626  | 1.08070  | 5.73584  |
| H | -6.42299 | 1.19919  | 5.73038  |
| H | -6.42239 | -1.20712 | 5.72850  |
| H | 6.43775  | -1.07492 | 5.73860  |
| H | 6.43850  | -3.29789 | 4.81718  |
| H | -6.42269 | -3.19825 | 4.90249  |
| H | -6.42359 | -4.89776 | 3.19851  |
| H | 6.43697  | -4.81866 | 3.29412  |
| H | 6.43579  | -5.73758 | 1.07027  |
| H | -6.42500 | -5.72179 | 1.20886  |
| H | -6.42744 | -5.71830 | -1.19762 |
| H | 6.43444  | -5.73728 | -1.08156 |
| H | 6.43240  | -4.81493 | -3.30381 |
| H | -6.42975 | -4.89535 | -3.18705 |
| H | -6.43134 | -3.19802 | -4.89268 |
| H | 6.43035  | -3.29062 | -4.82609 |
| H | 6.42636  | -1.06916 | -5.74993 |
| H | -6.43318 | -1.20942 | -5.72020 |
| H | -6.43683 | 1.19729  | -5.71683 |

|   |          |          |          |
|---|----------|----------|----------|
| O | -0.00000 | -0.00000 | -0.00001 |
| W | 1.42492  | -0.82268 | -1.64536 |
| W | -1.42493 | 0.82267  | 1.64535  |
| W | 1.42491  | -0.82267 | 1.64534  |
| W | -1.42491 | 0.82268  | -1.64534 |
| W | -1.16344 | -2.01512 | 0.00000  |
| W | 1.16344  | 2.01512  | -0.00001 |
| O | 2.09611  | 0.96567  | -1.33244 |
| O | -0.21175 | 2.29808  | 1.33243  |
| O | -2.09611 | -0.96567 | 1.33244  |
| O | 0.21175  | -2.29809 | -1.33244 |
| O | -0.00001 | -0.00000 | -2.66488 |
| O | 2.30785  | -1.33244 | -0.00000 |
| O | -0.00001 | -0.00002 | 2.66487  |
| O | -2.30785 | 1.33243  | 0.00000  |
| O | -2.09613 | -0.96568 | -1.33244 |
| O | 0.21175  | -2.29815 | 1.33246  |
| O | 2.09614  | 0.96569  | 1.33245  |
| O | -0.21175 | 2.29815  | -1.33245 |
| O | 2.47551  | -1.42918 | 2.85846  |
| O | -2.47551 | 1.42923  | -2.85843 |
| O | 2.02123  | 3.50087  | -0.00002 |
| O | -2.02122 | -3.50088 | 0.00003  |
| O | 2.47552  | -1.42922 | -2.85848 |
| O | -2.47552 | 1.42923  | 2.85848  |

**W<sub>6</sub>O<sub>19</sub><sup>2-</sup>@(8,8) h-CNT (y/z = 45°/45°)**

217

|   |          |         |          |
|---|----------|---------|----------|
| C | -4.30492 | 1.42279 | -5.32884 |
| C | -1.84686 | 1.40599 | -5.23837 |
| C | 0.60489  | 1.40776 | -5.25063 |
| C | 3.06853  | 1.41116 | -5.26147 |
| C | 5.47690  | 1.51187 | -5.43810 |
| C | -4.30631 | 2.75755 | -4.77487 |
| C | -1.84825 | 2.70933 | -4.69881 |
| C | 0.60347  | 2.72095 | -4.70735 |
| C | 3.06709  | 2.72975 | -4.71697 |

|   |          |         |          |
|---|----------|---------|----------|
| C | 5.47524  | 2.78648 | -4.91323 |
| C | -5.49321 | 3.46066 | -4.43525 |
| C | -3.08381 | 3.30912 | -4.31728 |
| C | -0.62004 | 3.30923 | -4.31225 |
| C | 1.83186  | 3.31044 | -4.30597 |
| C | 4.28923  | 3.36592 | -4.38752 |
| C | -5.49317 | 4.43489 | -3.46026 |
| C | -3.08374 | 4.31783 | -3.30835 |
| C | -0.62001 | 4.31537 | -3.30851 |
| C | 1.83175  | 4.30859 | -3.30933 |
| C | 4.28952  | 4.38688 | -3.36491 |
| C | -4.30656 | 4.77367 | -2.75649 |
| C | -1.84841 | 4.70145 | -2.70903 |
| C | 0.60341  | 4.71146 | -2.72066 |
| C | 3.06729  | 4.71865 | -2.72900 |
| C | 5.47638  | 4.90874 | -2.78409 |
| C | -4.30573 | 5.32580 | -1.42098 |
| C | -1.84727 | 5.24066 | -1.40552 |
| C | 0.60450  | 5.25403 | -1.40707 |
| C | 3.06841  | 5.26287 | -1.41030 |
| C | 5.47739  | 5.43350 | -1.50982 |
| C | -5.49160 | 5.58314 | -0.68197 |
| C | -3.08190 | 5.39401 | -0.70960 |
| C | -0.61782 | 5.39031 | -0.70989 |
| C | 1.83403  | 5.38428 | -0.70757 |
| C | 4.29213  | 5.47355 | -0.72798 |
| C | -5.48939 | 5.58319 | 0.69610  |
| C | -3.07991 | 5.39336 | 0.71720  |
| C | -0.61585 | 5.38964 | 0.71145  |
| C | 1.83580  | 5.38343 | 0.70305  |
| C | 4.29400  | 5.47258 | 0.71679  |
| C | -4.30176 | 5.32594 | 1.43173  |
| C | -1.84357 | 5.23931 | 1.41004  |
| C | 0.60816  | 5.25225 | 1.40546  |
| C | 3.07206  | 5.26124 | 1.40230  |
| C | 5.48165  | 5.43084 | 1.49523  |
| C | -4.29962 | 4.77238 | 2.76646  |

|   |          |          |         |
|---|----------|----------|---------|
| C | -1.84134 | 4.69988  | 2.71369 |
| C | 0.61046  | 4.70728  | 2.71811 |
| C | 3.07424  | 4.71503  | 2.72027 |
| C | 5.48374  | 4.90443  | 2.76894 |
| C | -5.48473 | 4.43360  | 3.47317 |
| C | -3.07539 | 4.31763  | 3.31642 |
| C | -0.61146 | 4.31279  | 3.30999 |
| C | 1.84017  | 4.30413  | 3.30370 |
| C | 4.29822  | 4.38172  | 3.35198 |
| C | -5.48254 | 3.46099  | 4.44958 |
| C | -3.07286 | 3.30948  | 4.32597 |
| C | -0.60906 | 3.30799  | 4.31532 |
| C | 1.84230  | 3.30648  | 4.30118 |
| C | 4.30032  | 3.35873  | 4.37240 |
| C | -4.29452 | 2.75816  | 4.78625 |
| C | -1.83664 | 2.70922  | 4.70535 |
| C | 0.61480  | 2.71839  | 4.70760 |
| C | 3.07845  | 2.72456  | 4.70786 |
| C | 5.48790  | 2.77789  | 4.89254 |
| C | -4.29209 | 1.42316  | 5.33900 |
| C | -1.83470 | 1.40552  | 5.24437 |
| C | 0.61664  | 1.40540  | 5.25220 |
| C | 3.08048  | 1.40636  | 5.25366 |
| C | 5.48985  | 1.50493  | 5.42082 |
| C | -5.47754 | 0.68550  | 5.59987 |
| C | -3.06919 | 0.71055  | 5.40178 |
| C | -0.60571 | 0.70885  | 5.39230 |
| C | 1.84593  | 0.70460  | 5.37929 |
| C | 4.30417  | 0.72353  | 5.46523 |
| C | -5.47719 | -0.69272 | 5.59886 |
| C | -3.06856 | -0.71631 | 5.40116 |
| C | -0.60484 | -0.71251 | 5.39188 |
| C | 1.84687  | -0.70616 | 5.38040 |
| C | 4.30530  | -0.72143 | 5.46684 |
| C | -4.29111 | -1.42970 | 5.33722 |
| C | -1.83322 | -1.41046 | 5.24440 |
| C | 0.61848  | -1.40765 | 5.25259 |

|   |          |          |          |
|---|----------|----------|----------|
| C | 3.08275  | -1.40632 | 5.25668  |
| C | 5.49216  | -1.50137 | 5.42410  |
| C | -4.29104 | -2.76477 | 4.78395  |
| C | -1.83299 | -2.71379 | 4.70457  |
| C | 0.61877  | -2.72063 | 4.70851  |
| C | 3.08306  | -2.72461 | 4.71146  |
| C | 5.49261  | -2.77447 | 4.89610  |
| C | -5.47753 | -3.46988 | 4.44663  |
| C | -3.06854 | -3.31486 | 4.32442  |
| C | -0.60446 | -3.31106 | 4.31512  |
| C | 1.84757  | -3.30743 | 4.30373  |
| C | 4.30572  | -3.35729 | 4.37663  |
| C | -5.47802 | -4.44296 | 3.47029  |
| C | -3.06910 | -4.32254 | 3.31424  |
| C | -0.60521 | -4.31588 | 3.31005  |
| C | 1.84678  | -4.30426 | 3.30554  |
| C | 4.30463  | -4.37834 | 3.35454  |
| C | -4.29214 | -4.78040 | 2.76454  |
| C | -1.83428 | -4.70336 | 2.71222  |
| C | 0.61763  | -4.70864 | 2.71930  |
| C | 3.08153  | -4.71206 | 2.72181  |
| C | 5.49093  | -4.89773 | 2.77107  |
| C | -4.29283 | -5.33340 | 1.42964  |
| C | -1.83502 | -5.24311 | 1.40894  |
| C | 0.61666  | -5.25177 | 1.40580  |
| C | 3.08067  | -5.25697 | 1.40344  |
| C | 5.49031  | -5.42380 | 1.49738  |
| C | -5.48007 | -5.59232 | 0.69381  |
| C | -3.07075 | -5.39876 | 0.71546  |
| C | -0.60695 | -5.39089 | 0.71089  |
| C | 1.84488  | -5.38073 | 0.70364  |
| C | 4.30313  | -5.46761 | 0.71871  |
| C | -5.48143 | -5.58999 | -0.68433 |
| C | -3.07211 | -5.39774 | -0.71116 |
| C | -0.60824 | -5.39097 | -0.71043 |
| C | 1.84371  | -5.38190 | -0.70708 |
| C | 4.30208  | -5.46797 | -0.72594 |

|   |          |          |          |
|---|----------|----------|----------|
| C | -4.29579 | -5.33069 | -1.42244 |
| C | -1.83757 | -5.24253 | -1.40684 |
| C | 0.61442  | -5.25258 | -1.40707 |
| C | 3.07849  | -5.25794 | -1.40884 |
| C | 5.48819  | -5.42281 | -1.50651 |
| C | -4.29727 | -4.77837 | -2.75740 |
| C | -1.83885 | -4.70357 | -2.71051 |
| C | 0.61342  | -4.70803 | -2.71995 |
| C | 3.07767  | -4.70985 | -2.72595 |
| C | 5.48707  | -4.89509 | -2.77963 |
| C | -5.48458 | -4.44145 | -3.46128 |
| C | -3.07484 | -4.32292 | -3.31056 |
| C | -0.61057 | -4.31566 | -3.30952 |
| C | 1.84155  | -4.30237 | -3.30755 |
| C | 4.29976  | -4.37405 | -3.36004 |
| C | -5.48549 | -3.46953 | -4.43828 |
| C | -3.07606 | -3.31498 | -4.32025 |
| C | -0.61201 | -3.31062 | -4.31435 |
| C | 1.84020  | -3.30461 | -4.30489 |
| C | 4.29835  | -3.35150 | -4.38073 |
| C | -4.29944 | -2.76528 | -4.77839 |
| C | -1.84140 | -2.71338 | -4.70148 |
| C | 0.61045  | -2.71900 | -4.70799 |
| C | 3.07450  | -2.72002 | -4.71428 |
| C | 5.48384  | -2.76804 | -4.90322 |
| C | -4.30124 | -1.43013 | -5.33115 |
| C | -1.84337 | -1.40944 | -5.23984 |
| C | 0.60857  | -1.40536 | -5.25066 |
| C | 3.07239  | -1.40170 | -5.26034 |
| C | 5.48160  | -1.49549 | -5.43259 |
| C | -5.48849 | -0.69405 | -5.59066 |
| C | -3.07938 | -0.71599 | -5.39552 |
| C | -0.61554 | -0.71101 | -5.38859 |
| C | 1.83606  | -0.70235 | -5.38122 |
| C | 4.29411  | -0.71643 | -5.47482 |
| C | -5.49056 | 0.68435  | -5.58884 |
| C | -3.08138 | 0.71075  | -5.39462 |

|   |          |          |          |
|---|----------|----------|----------|
| C | -0.61742 | 0.71031  | -5.38818 |
| C | 1.83420  | 0.70836  | -5.38149 |
| C | 4.29196  | 0.72887  | -5.47594 |
| H | 6.42247  | 1.08806  | -5.75616 |
| H | 6.41952  | 3.31363  | -4.83975 |
| H | -6.43890 | 3.18801  | -4.88933 |
| H | -6.43887 | 4.88844  | -3.18673 |
| H | 6.42128  | 4.83340  | -3.30980 |
| H | 6.42301  | 5.74980  | -1.08485 |
| H | -6.43814 | 5.71049  | -1.19460 |
| H | -6.43445 | 5.71047  | 1.21147  |
| H | 6.42636  | 5.74728  | 1.06829  |
| H | 6.42992  | 4.82777  | 3.29224  |
| H | -6.43107 | 4.88709  | 3.20187  |
| H | -6.42711 | 3.18839  | 4.90611  |
| H | 6.43279  | 3.30298  | 4.81342  |
| H | 6.43626  | 1.08070  | 5.73584  |
| H | -6.42299 | 1.19919  | 5.73038  |
| H | -6.42239 | -1.20712 | 5.72850  |
| H | 6.43775  | -1.07492 | 5.73860  |
| H | 6.43850  | -3.29789 | 4.81718  |
| H | -6.42269 | -3.19825 | 4.90249  |
| H | -6.42359 | -4.89776 | 3.19851  |
| H | 6.43697  | -4.81866 | 3.29412  |
| H | 6.43579  | -5.73758 | 1.07027  |
| H | -6.42500 | -5.72179 | 1.20886  |
| H | -6.42744 | -5.71830 | -1.19762 |
| H | 6.43444  | -5.73728 | -1.08156 |
| H | 6.43240  | -4.81493 | -3.30381 |
| H | -6.42975 | -4.89535 | -3.18705 |
| H | -6.43134 | -3.19802 | -4.89268 |
| H | 6.43035  | -3.29062 | -4.82609 |
| H | 6.42636  | -1.06916 | -5.74993 |
| H | -6.43318 | -1.20942 | -5.72020 |
| H | -6.43683 | 1.19729  | -5.71683 |
| O | -0.00000 | -0.00000 | -0.00001 |
| W | 1.16344  | -1.16344 | -1.64536 |

|   |          |          |          |
|---|----------|----------|----------|
| W | -1.16346 | 1.16344  | 1.64535  |
| W | 1.16344  | -1.16343 | 1.64534  |
| W | -1.16343 | 1.16344  | -1.64534 |
| W | -1.64535 | -1.64534 | 0.00000  |
| W | 1.64535  | 1.64533  | -0.00001 |
| O | 2.27462  | 0.39025  | -1.33244 |
| O | 0.39026  | 2.27458  | 1.33243  |
| O | -2.27462 | -0.39025 | 1.33244  |
| O | -0.39026 | -2.27459 | -1.33244 |
| O | -0.00001 | 0.00000  | -2.66488 |
| O | 1.88435  | -1.88435 | -0.00000 |
| O | -0.00001 | -0.00002 | 2.66487  |
| O | -1.88435 | 1.88435  | 0.00000  |
| O | -2.27465 | -0.39026 | -1.33244 |
| O | -0.39027 | -2.27464 | 1.33246  |
| O | 2.27466  | 0.39027  | 1.33245  |
| O | 0.39027  | 2.27465  | -1.33245 |
| O | 2.02126  | -2.02119 | 2.85846  |
| O | -2.02124 | 2.02124  | -2.85843 |
| O | 2.85845  | 2.85845  | -0.00002 |
| O | -2.85844 | -2.85846 | 0.00003  |
| O | 2.02126  | -2.02124 | -2.85848 |
| O | -2.02126 | 2.02124  | 2.85848  |

**W<sub>6</sub>O<sub>19</sub><sup>2-</sup>@(8,8) h-CNT (y/z = 45°/60°)**

217

|   |          |         |          |
|---|----------|---------|----------|
| C | -4.30492 | 1.42279 | -5.32884 |
| C | -1.84686 | 1.40599 | -5.23837 |
| C | 0.60489  | 1.40776 | -5.25063 |
| C | 3.06853  | 1.41116 | -5.26147 |
| C | 5.47690  | 1.51187 | -5.43810 |
| C | -4.30631 | 2.75755 | -4.77487 |
| C | -1.84825 | 2.70933 | -4.69881 |
| C | 0.60347  | 2.72095 | -4.70735 |
| C | 3.06709  | 2.72975 | -4.71697 |
| C | 5.47524  | 2.78648 | -4.91323 |
| C | -5.49321 | 3.46066 | -4.43525 |



|   |          |         |          |
|---|----------|---------|----------|
| C | -3.08381 | 3.30912 | -4.31728 |
| C | -0.62004 | 3.30923 | -4.31225 |
| C | 1.83186  | 3.31044 | -4.30597 |
| C | 4.28923  | 3.36592 | -4.38752 |
| C | -5.49317 | 4.43489 | -3.46026 |
| C | -3.08374 | 4.31783 | -3.30835 |
| C | -0.62001 | 4.31537 | -3.30851 |
| C | 1.83175  | 4.30859 | -3.30933 |
| C | 4.28952  | 4.38688 | -3.36491 |
| C | -4.30656 | 4.77367 | -2.75649 |
| C | -1.84841 | 4.70145 | -2.70903 |
| C | 0.60341  | 4.71146 | -2.72066 |
| C | 3.06729  | 4.71865 | -2.72900 |
| C | 5.47638  | 4.90874 | -2.78409 |
| C | -4.30573 | 5.32580 | -1.42098 |
| C | -1.84727 | 5.24066 | -1.40552 |
| C | 0.60450  | 5.25403 | -1.40707 |
| C | 3.06841  | 5.26287 | -1.41030 |
| C | 5.47739  | 5.43350 | -1.50982 |
| C | -5.49160 | 5.58314 | -0.68197 |
| C | -3.08190 | 5.39401 | -0.70960 |
| C | -0.61782 | 5.39031 | -0.70989 |
| C | 1.83403  | 5.38428 | -0.70757 |
| C | 4.29213  | 5.47355 | -0.72798 |
| C | -5.48939 | 5.58319 | 0.69610  |
| C | -3.07991 | 5.39336 | 0.71720  |
| C | -0.61585 | 5.38964 | 0.71145  |
| C | 1.83580  | 5.38343 | 0.70305  |
| C | 4.29400  | 5.47258 | 0.71679  |
| C | -4.30176 | 5.32594 | 1.43173  |
| C | -1.84357 | 5.23931 | 1.41004  |
| C | 0.60816  | 5.25225 | 1.40546  |
| C | 3.07206  | 5.26124 | 1.40230  |
| C | 5.48165  | 5.43084 | 1.49523  |
| C | -4.29962 | 4.77238 | 2.76646  |
| C | -1.84134 | 4.69988 | 2.71369  |
| C | 0.61046  | 4.70728 | 2.71811  |

|   |          |          |         |
|---|----------|----------|---------|
| C | 3.07424  | 4.71503  | 2.72027 |
| C | 5.48374  | 4.90443  | 2.76894 |
| C | -5.48473 | 4.43360  | 3.47317 |
| C | -3.07539 | 4.31763  | 3.31642 |
| C | -0.61146 | 4.31279  | 3.30999 |
| C | 1.84017  | 4.30413  | 3.30370 |
| C | 4.29822  | 4.38172  | 3.35198 |
| C | -5.48254 | 3.46099  | 4.44958 |
| C | -3.07286 | 3.30948  | 4.32597 |
| C | -0.60906 | 3.30799  | 4.31532 |
| C | 1.84230  | 3.30648  | 4.30118 |
| C | 4.30032  | 3.35873  | 4.37240 |
| C | -4.29452 | 2.75816  | 4.78625 |
| C | -1.83664 | 2.70922  | 4.70535 |
| C | 0.61480  | 2.71839  | 4.70760 |
| C | 3.07845  | 2.72456  | 4.70786 |
| C | 5.48790  | 2.77789  | 4.89254 |
| C | -4.29209 | 1.42316  | 5.33900 |
| C | -1.83470 | 1.40552  | 5.24437 |
| C | 0.61664  | 1.40540  | 5.25220 |
| C | 3.08048  | 1.40636  | 5.25366 |
| C | 5.48985  | 1.50493  | 5.42082 |
| C | -5.47754 | 0.68550  | 5.59987 |
| C | -3.06919 | 0.71055  | 5.40178 |
| C | -0.60571 | 0.70885  | 5.39230 |
| C | 1.84593  | 0.70460  | 5.37929 |
| C | 4.30417  | 0.72353  | 5.46523 |
| C | -5.47719 | -0.69272 | 5.59886 |
| C | -3.06856 | -0.71631 | 5.40116 |
| C | -0.60484 | -0.71251 | 5.39188 |
| C | 1.84687  | -0.70616 | 5.38040 |
| C | 4.30530  | -0.72143 | 5.46684 |
| C | -4.29111 | -1.42970 | 5.33722 |
| C | -1.83322 | -1.41046 | 5.24440 |
| C | 0.61848  | -1.40765 | 5.25259 |
| C | 3.08275  | -1.40632 | 5.25668 |
| C | 5.49216  | -1.50137 | 5.42410 |

|   |          |          |          |
|---|----------|----------|----------|
| C | -4.29104 | -2.76477 | 4.78395  |
| C | -1.83299 | -2.71379 | 4.70457  |
| C | 0.61877  | -2.72063 | 4.70851  |
| C | 3.08306  | -2.72461 | 4.71146  |
| C | 5.49261  | -2.77447 | 4.89610  |
| C | -5.47753 | -3.46988 | 4.44663  |
| C | -3.06854 | -3.31486 | 4.32442  |
| C | -0.60446 | -3.31106 | 4.31512  |
| C | 1.84757  | -3.30743 | 4.30373  |
| C | 4.30572  | -3.35729 | 4.37663  |
| C | -5.47802 | -4.44296 | 3.47029  |
| C | -3.06910 | -4.32254 | 3.31424  |
| C | -0.60521 | -4.31588 | 3.31005  |
| C | 1.84678  | -4.30426 | 3.30554  |
| C | 4.30463  | -4.37834 | 3.35454  |
| C | -4.29214 | -4.78040 | 2.76454  |
| C | -1.83428 | -4.70336 | 2.71222  |
| C | 0.61763  | -4.70864 | 2.71930  |
| C | 3.08153  | -4.71206 | 2.72181  |
| C | 5.49093  | -4.89773 | 2.77107  |
| C | -4.29283 | -5.33340 | 1.42964  |
| C | -1.83502 | -5.24311 | 1.40894  |
| C | 0.61666  | -5.25177 | 1.40580  |
| C | 3.08067  | -5.25697 | 1.40344  |
| C | 5.49031  | -5.42380 | 1.49738  |
| C | -5.48007 | -5.59232 | 0.69381  |
| C | -3.07075 | -5.39876 | 0.71546  |
| C | -0.60695 | -5.39089 | 0.71089  |
| C | 1.84488  | -5.38073 | 0.70364  |
| C | 4.30313  | -5.46761 | 0.71871  |
| C | -5.48143 | -5.58999 | -0.68433 |
| C | -3.07211 | -5.39774 | -0.71116 |
| C | -0.60824 | -5.39097 | -0.71043 |
| C | 1.84371  | -5.38190 | -0.70708 |
| C | 4.30208  | -5.46797 | -0.72594 |
| C | -4.29579 | -5.33069 | -1.42244 |
| C | -1.83757 | -5.24253 | -1.40684 |

|   |          |          |          |
|---|----------|----------|----------|
| C | 0.61442  | -5.25258 | -1.40707 |
| C | 3.07849  | -5.25794 | -1.40884 |
| C | 5.48819  | -5.42281 | -1.50651 |
| C | -4.29727 | -4.77837 | -2.75740 |
| C | -1.83885 | -4.70357 | -2.71051 |
| C | 0.61342  | -4.70803 | -2.71995 |
| C | 3.07767  | -4.70985 | -2.72595 |
| C | 5.48707  | -4.89509 | -2.77963 |
| C | -5.48458 | -4.44145 | -3.46128 |
| C | -3.07484 | -4.32292 | -3.31056 |
| C | -0.61057 | -4.31566 | -3.30952 |
| C | 1.84155  | -4.30237 | -3.30755 |
| C | 4.29976  | -4.37405 | -3.36004 |
| C | -5.48549 | -3.46953 | -4.43828 |
| C | -3.07606 | -3.31498 | -4.32025 |
| C | -0.61201 | -3.31062 | -4.31435 |
| C | 1.84020  | -3.30461 | -4.30489 |
| C | 4.29835  | -3.35150 | -4.38073 |
| C | -4.29944 | -2.76528 | -4.77839 |
| C | -1.84140 | -2.71338 | -4.70148 |
| C | 0.61045  | -2.71900 | -4.70799 |
| C | 3.07450  | -2.72002 | -4.71428 |
| C | 5.48384  | -2.76804 | -4.90322 |
| C | -4.30124 | -1.43013 | -5.33115 |
| C | -1.84337 | -1.40944 | -5.23984 |
| C | 0.60857  | -1.40536 | -5.25066 |
| C | 3.07239  | -1.40170 | -5.26034 |
| C | 5.48160  | -1.49549 | -5.43259 |
| C | -5.48849 | -0.69405 | -5.59066 |
| C | -3.07938 | -0.71599 | -5.39552 |
| C | -0.61554 | -0.71101 | -5.38859 |
| C | 1.83606  | -0.70235 | -5.38122 |
| C | 4.29411  | -0.71643 | -5.47482 |
| C | -5.49056 | 0.68435  | -5.58884 |
| C | -3.08138 | 0.71075  | -5.39462 |
| C | -0.61742 | 0.71031  | -5.38818 |
| C | 1.83420  | 0.70836  | -5.38149 |

|   |          |          |          |
|---|----------|----------|----------|
| C | 4.29196  | 0.72887  | -5.47594 |
| H | 6.42247  | 1.08806  | -5.75616 |
| H | 6.41952  | 3.31363  | -4.83975 |
| H | -6.43890 | 3.18801  | -4.88933 |
| H | -6.43887 | 4.88844  | -3.18673 |
| H | 6.42128  | 4.83340  | -3.30980 |
| H | 6.42301  | 5.74980  | -1.08485 |
| H | -6.43814 | 5.71049  | -1.19460 |
| H | -6.43445 | 5.71047  | 1.21147  |
| H | 6.42636  | 5.74728  | 1.06829  |
| H | 6.42992  | 4.82777  | 3.29224  |
| H | -6.43107 | 4.88709  | 3.20187  |
| H | -6.42711 | 3.18839  | 4.90611  |
| H | 6.43279  | 3.30298  | 4.81342  |
| H | 6.43626  | 1.08070  | 5.73584  |
| H | -6.42299 | 1.19919  | 5.73038  |
| H | -6.42239 | -1.20712 | 5.72850  |
| H | 6.43775  | -1.07492 | 5.73860  |
| H | 6.43850  | -3.29789 | 4.81718  |
| H | -6.42269 | -3.19825 | 4.90249  |
| H | -6.42359 | -4.89776 | 3.19851  |
| H | 6.43697  | -4.81866 | 3.29412  |
| H | 6.43579  | -5.73758 | 1.07027  |
| H | -6.42500 | -5.72179 | 1.20886  |
| H | -6.42744 | -5.71830 | -1.19762 |
| H | 6.43444  | -5.73728 | -1.08156 |
| H | 6.43240  | -4.81493 | -3.30381 |
| H | -6.42975 | -4.89535 | -3.18705 |
| H | -6.43134 | -3.19802 | -4.89268 |
| H | 6.43035  | -3.29062 | -4.82609 |
| H | 6.42636  | -1.06916 | -5.74993 |
| H | -6.43318 | -1.20942 | -5.72020 |
| H | -6.43683 | 1.19729  | -5.71683 |
| O | -0.00001 | -0.00000 | -0.00001 |
| W | 0.82268  | -1.42492 | -1.64536 |
| W | -0.82269 | 1.42492  | 1.64535  |
| W | 0.82267  | -1.42491 | 1.64534  |

|   |          |          |          |
|---|----------|----------|----------|
| W | -0.82267 | 1.42491  | -1.64534 |
| W | -2.01513 | -1.16343 | 0.00000  |
| W | 2.01513  | 1.16342  | -0.00001 |
| O | 2.29811  | -0.21176 | -1.33244 |
| O | 0.96566  | 2.09607  | 1.33243  |
| O | -2.29812 | 0.21176  | 1.33244  |
| O | -0.96567 | -2.09608 | -1.33244 |
| O | -0.00001 | 0.00000  | -2.66488 |
| O | 1.33244  | -2.30785 | -0.00000 |
| O | -0.00001 | -0.00001 | 2.66487  |
| O | -1.33244 | 2.30785  | 0.00000  |
| O | -2.29815 | 0.21176  | -1.33244 |
| O | -0.96570 | -2.09613 | 1.33246  |
| O | 2.29816  | -0.21175 | 1.33245  |
| O | 0.96570  | 2.09613  | -1.33245 |
| O | 1.42926  | -2.47546 | 2.85846  |
| O | -1.42923 | 2.47551  | -2.85843 |
| O | 3.50088  | 2.02123  | -0.00002 |
| O | -3.50087 | -2.02124 | 0.00003  |
| O | 1.42925  | -2.47551 | -2.85848 |
| O | -1.42925 | 2.47551  | 2.85848  |

**W<sub>6</sub>O<sub>19</sub><sup>2-</sup>@(8,8) h-CNT (y/z = 45°/75°)**

217

|   |          |         |          |
|---|----------|---------|----------|
| C | -4.30492 | 1.42279 | -5.32884 |
| C | -1.84686 | 1.40599 | -5.23837 |
| C | 0.60489  | 1.40776 | -5.25063 |
| C | 3.06853  | 1.41116 | -5.26147 |
| C | 5.47690  | 1.51187 | -5.43810 |
| C | -4.30631 | 2.75755 | -4.77487 |
| C | -1.84825 | 2.70933 | -4.69881 |
| C | 0.60347  | 2.72095 | -4.70735 |
| C | 3.06709  | 2.72975 | -4.71697 |
| C | 5.47524  | 2.78648 | -4.91323 |
| C | -5.49321 | 3.46066 | -4.43525 |
| C | -3.08381 | 3.30912 | -4.31728 |
| C | -0.62004 | 3.30923 | -4.31225 |

|   |          |         |          |
|---|----------|---------|----------|
| C | 1.83186  | 3.31044 | -4.30597 |
| C | 4.28923  | 3.36592 | -4.38752 |
| C | -5.49317 | 4.43489 | -3.46026 |
| C | -3.08374 | 4.31783 | -3.30835 |
| C | -0.62001 | 4.31537 | -3.30851 |
| C | 1.83175  | 4.30859 | -3.30933 |
| C | 4.28952  | 4.38688 | -3.36491 |
| C | -4.30656 | 4.77367 | -2.75649 |
| C | -1.84841 | 4.70145 | -2.70903 |
| C | 0.60341  | 4.71146 | -2.72066 |
| C | 3.06729  | 4.71865 | -2.72900 |
| C | 5.47638  | 4.90874 | -2.78409 |
| C | -4.30573 | 5.32580 | -1.42098 |
| C | -1.84727 | 5.24066 | -1.40552 |
| C | 0.60450  | 5.25403 | -1.40707 |
| C | 3.06841  | 5.26287 | -1.41030 |
| C | 5.47739  | 5.43350 | -1.50982 |
| C | -5.49160 | 5.58314 | -0.68197 |
| C | -3.08190 | 5.39401 | -0.70960 |
| C | -0.61782 | 5.39031 | -0.70989 |
| C | 1.83403  | 5.38428 | -0.70757 |
| C | 4.29213  | 5.47355 | -0.72798 |
| C | -5.48939 | 5.58319 | 0.69610  |
| C | -3.07991 | 5.39336 | 0.71720  |
| C | -0.61585 | 5.38964 | 0.71145  |
| C | 1.83580  | 5.38343 | 0.70305  |
| C | 4.29400  | 5.47258 | 0.71679  |
| C | -4.30176 | 5.32594 | 1.43173  |
| C | -1.84357 | 5.23931 | 1.41004  |
| C | 0.60816  | 5.25225 | 1.40546  |
| C | 3.07206  | 5.26124 | 1.40230  |
| C | 5.48165  | 5.43084 | 1.49523  |
| C | -4.29962 | 4.77238 | 2.76646  |
| C | -1.84134 | 4.69988 | 2.71369  |
| C | 0.61046  | 4.70728 | 2.71811  |
| C | 3.07424  | 4.71503 | 2.72027  |
| C | 5.48374  | 4.90443 | 2.76894  |

|   |          |          |         |
|---|----------|----------|---------|
| C | -5.48473 | 4.43360  | 3.47317 |
| C | -3.07539 | 4.31763  | 3.31642 |
| C | -0.61146 | 4.31279  | 3.30999 |
| C | 1.84017  | 4.30413  | 3.30370 |
| C | 4.29822  | 4.38172  | 3.35198 |
| C | -5.48254 | 3.46099  | 4.44958 |
| C | -3.07286 | 3.30948  | 4.32597 |
| C | -0.60906 | 3.30799  | 4.31532 |
| C | 1.84230  | 3.30648  | 4.30118 |
| C | 4.30032  | 3.35873  | 4.37240 |
| C | -4.29452 | 2.75816  | 4.78625 |
| C | -1.83664 | 2.70922  | 4.70535 |
| C | 0.61480  | 2.71839  | 4.70760 |
| C | 3.07845  | 2.72456  | 4.70786 |
| C | 5.48790  | 2.77789  | 4.89254 |
| C | -4.29209 | 1.42316  | 5.33900 |
| C | -1.83470 | 1.40552  | 5.24437 |
| C | 0.61664  | 1.40540  | 5.25220 |
| C | 3.08048  | 1.40636  | 5.25366 |
| C | 5.48985  | 1.50493  | 5.42082 |
| C | -5.47754 | 0.68550  | 5.59987 |
| C | -3.06919 | 0.71055  | 5.40178 |
| C | -0.60571 | 0.70885  | 5.39230 |
| C | 1.84593  | 0.70460  | 5.37929 |
| C | 4.30417  | 0.72353  | 5.46523 |
| C | -5.47719 | -0.69272 | 5.59886 |
| C | -3.06856 | -0.71631 | 5.40116 |
| C | -0.60484 | -0.71251 | 5.39188 |
| C | 1.84687  | -0.70616 | 5.38040 |
| C | 4.30530  | -0.72143 | 5.46684 |
| C | -4.29111 | -1.42970 | 5.33722 |
| C | -1.83322 | -1.41046 | 5.24440 |
| C | 0.61848  | -1.40765 | 5.25259 |
| C | 3.08275  | -1.40632 | 5.25668 |
| C | 5.49216  | -1.50137 | 5.42410 |
| C | -4.29104 | -2.76477 | 4.78395 |
| C | -1.83299 | -2.71379 | 4.70457 |



|   |          |          |          |
|---|----------|----------|----------|
| C | 0.61877  | -2.72063 | 4.70851  |
| C | 3.08306  | -2.72461 | 4.71146  |
| C | 5.49261  | -2.77447 | 4.89610  |
| C | -5.47753 | -3.46988 | 4.44663  |
| C | -3.06854 | -3.31486 | 4.32442  |
| C | -0.60446 | -3.31106 | 4.31512  |
| C | 1.84757  | -3.30743 | 4.30373  |
| C | 4.30572  | -3.35729 | 4.37663  |
| C | -5.47802 | -4.44296 | 3.47029  |
| C | -3.06910 | -4.32254 | 3.31424  |
| C | -0.60521 | -4.31588 | 3.31005  |
| C | 1.84678  | -4.30426 | 3.30554  |
| C | 4.30463  | -4.37834 | 3.35454  |
| C | -4.29214 | -4.78040 | 2.76454  |
| C | -1.83428 | -4.70336 | 2.71222  |
| C | 0.61763  | -4.70864 | 2.71930  |
| C | 3.08153  | -4.71206 | 2.72181  |
| C | 5.49093  | -4.89773 | 2.77107  |
| C | -4.29283 | -5.33340 | 1.42964  |
| C | -1.83502 | -5.24311 | 1.40894  |
| C | 0.61666  | -5.25177 | 1.40580  |
| C | 3.08067  | -5.25697 | 1.40344  |
| C | 5.49031  | -5.42380 | 1.49738  |
| C | -5.48007 | -5.59232 | 0.69381  |
| C | -3.07075 | -5.39876 | 0.71546  |
| C | -0.60695 | -5.39089 | 0.71089  |
| C | 1.84488  | -5.38073 | 0.70364  |
| C | 4.30313  | -5.46761 | 0.71871  |
| C | -5.48143 | -5.58999 | -0.68433 |
| C | -3.07211 | -5.39774 | -0.71116 |
| C | -0.60824 | -5.39097 | -0.71043 |
| C | 1.84371  | -5.38190 | -0.70708 |
| C | 4.30208  | -5.46797 | -0.72594 |
| C | -4.29579 | -5.33069 | -1.42244 |
| C | -1.83757 | -5.24253 | -1.40684 |
| C | 0.61442  | -5.25258 | -1.40707 |
| C | 3.07849  | -5.25794 | -1.40884 |

|   |          |          |          |
|---|----------|----------|----------|
| C | 5.48819  | -5.42281 | -1.50651 |
| C | -4.29727 | -4.77837 | -2.75740 |
| C | -1.83885 | -4.70357 | -2.71051 |
| C | 0.61342  | -4.70803 | -2.71995 |
| C | 3.07767  | -4.70985 | -2.72595 |
| C | 5.48707  | -4.89509 | -2.77963 |
| C | -5.48458 | -4.44145 | -3.46128 |
| C | -3.07484 | -4.32292 | -3.31056 |
| C | -0.61057 | -4.31566 | -3.30952 |
| C | 1.84155  | -4.30237 | -3.30755 |
| C | 4.29976  | -4.37405 | -3.36004 |
| C | -5.48549 | -3.46953 | -4.43828 |
| C | -3.07606 | -3.31498 | -4.32025 |
| C | -0.61201 | -3.31062 | -4.31435 |
| C | 1.84020  | -3.30461 | -4.30489 |
| C | 4.29835  | -3.35150 | -4.38073 |
| C | -4.29944 | -2.76528 | -4.77839 |
| C | -1.84140 | -2.71338 | -4.70148 |
| C | 0.61045  | -2.71900 | -4.70799 |
| C | 3.07450  | -2.72002 | -4.71428 |
| C | 5.48384  | -2.76804 | -4.90322 |
| C | -4.30124 | -1.43013 | -5.33115 |
| C | -1.84337 | -1.40944 | -5.23984 |
| C | 0.60857  | -1.40536 | -5.25066 |
| C | 3.07239  | -1.40170 | -5.26034 |
| C | 5.48160  | -1.49549 | -5.43259 |
| C | -5.48849 | -0.69405 | -5.59066 |
| C | -3.07938 | -0.71599 | -5.39552 |
| C | -0.61554 | -0.71101 | -5.38859 |
| C | 1.83606  | -0.70235 | -5.38122 |
| C | 4.29411  | -0.71643 | -5.47482 |
| C | -5.49056 | 0.68435  | -5.58884 |
| C | -3.08138 | 0.71075  | -5.39462 |
| C | -0.61742 | 0.71031  | -5.38818 |
| C | 1.83420  | 0.70836  | -5.38149 |
| C | 4.29196  | 0.72887  | -5.47594 |
| H | 6.42247  | 1.08806  | -5.75616 |

|   |          |          |          |
|---|----------|----------|----------|
| H | 6.41952  | 3.31363  | -4.83975 |
| H | -6.43890 | 3.18801  | -4.88933 |
| H | -6.43887 | 4.88844  | -3.18673 |
| H | 6.42128  | 4.83340  | -3.30980 |
| H | 6.42301  | 5.74980  | -1.08485 |
| H | -6.43814 | 5.71049  | -1.19460 |
| H | -6.43445 | 5.71047  | 1.21147  |
| H | 6.42636  | 5.74728  | 1.06829  |
| H | 6.42992  | 4.82777  | 3.29224  |
| H | -6.43107 | 4.88709  | 3.20187  |
| H | -6.42711 | 3.18839  | 4.90611  |
| H | 6.43279  | 3.30298  | 4.81342  |
| H | 6.43626  | 1.08070  | 5.73584  |
| H | -6.42299 | 1.19919  | 5.73038  |
| H | -6.42239 | -1.20712 | 5.72850  |
| H | 6.43775  | -1.07492 | 5.73860  |
| H | 6.43850  | -3.29789 | 4.81718  |
| H | -6.42269 | -3.19825 | 4.90249  |
| H | -6.42359 | -4.89776 | 3.19851  |
| H | 6.43697  | -4.81866 | 3.29412  |
| H | 6.43579  | -5.73758 | 1.07027  |
| H | -6.42500 | -5.72179 | 1.20886  |
| H | -6.42744 | -5.71830 | -1.19762 |
| H | 6.43444  | -5.73728 | -1.08156 |
| H | 6.43240  | -4.81493 | -3.30381 |
| H | -6.42975 | -4.89535 | -3.18705 |
| H | -6.43134 | -3.19802 | -4.89268 |
| H | 6.43035  | -3.29062 | -4.82609 |
| H | 6.42636  | -1.06916 | -5.74993 |
| H | -6.43318 | -1.20942 | -5.72020 |
| H | -6.43683 | 1.19729  | -5.71683 |
| O | -0.00001 | -0.00000 | -0.00001 |
| W | 0.42585  | -1.58929 | -1.64536 |
| W | -0.42586 | 1.58930  | 1.64535  |
| W | 0.42585  | -1.58928 | 1.64534  |
| W | -0.42584 | 1.58928  | -1.64534 |
| W | -2.24758 | -0.60223 | 0.00000  |

|   |          |          |          |
|---|----------|----------|----------|
| W | 2.24759  | 0.60222  | -0.00001 |
| O | 2.16500  | -0.79934 | -1.33244 |
| O | 1.47526  | 1.77472  | 1.33243  |
| O | -2.16500 | 0.79934  | 1.33244  |
| O | -1.47527 | -1.77473 | -1.33244 |
| O | -0.00001 | 0.00000  | -2.66488 |
| O | 0.68972  | -2.57407 | -0.00000 |
| O | -0.00002 | -0.00001 | 2.66487  |
| O | -0.68972 | 2.57407  | 0.00000  |
| O | -2.16503 | 0.79935  | -1.33244 |
| O | -1.47531 | -1.77476 | 1.33246  |
| O | 2.16504  | -0.79935 | 1.33245  |
| O | 1.47531  | 1.77477  | -1.33245 |
| O | 0.73987  | -2.76104 | 2.85846  |
| O | -0.73983 | 2.76107  | -2.85843 |
| O | 3.90472  | 1.04626  | -0.00002 |
| O | -3.90471 | -1.04627 | 0.00003  |
| O | 0.73984  | -2.76108 | -2.85848 |
| O | -0.73984 | 2.76108  | 2.85848  |

**W<sub>6</sub>O<sub>19</sub><sup>2-</sup>@(8,8) h-CNT (y/z = 45°/90°)**

217

|   |          |         |          |
|---|----------|---------|----------|
| C | -4.30492 | 1.42279 | -5.32884 |
| C | -1.84686 | 1.40599 | -5.23837 |
| C | 0.60489  | 1.40776 | -5.25063 |
| C | 3.06853  | 1.41116 | -5.26147 |
| C | 5.47690  | 1.51187 | -5.43810 |
| C | -4.30631 | 2.75755 | -4.77487 |
| C | -1.84825 | 2.70933 | -4.69881 |
| C | 0.60347  | 2.72095 | -4.70735 |
| C | 3.06709  | 2.72975 | -4.71697 |
| C | 5.47524  | 2.78648 | -4.91323 |
| C | -5.49321 | 3.46066 | -4.43525 |
| C | -3.08381 | 3.30912 | -4.31728 |
| C | -0.62004 | 3.30923 | -4.31225 |
| C | 1.83186  | 3.31044 | -4.30597 |
| C | 4.28923  | 3.36592 | -4.38752 |

|   |          |         |          |
|---|----------|---------|----------|
| C | -5.49317 | 4.43489 | -3.46026 |
| C | -3.08374 | 4.31783 | -3.30835 |
| C | -0.62001 | 4.31537 | -3.30851 |
| C | 1.83175  | 4.30859 | -3.30933 |
| C | 4.28952  | 4.38688 | -3.36491 |
| C | -4.30656 | 4.77367 | -2.75649 |
| C | -1.84841 | 4.70145 | -2.70903 |
| C | 0.60341  | 4.71146 | -2.72066 |
| C | 3.06729  | 4.71865 | -2.72900 |
| C | 5.47638  | 4.90874 | -2.78409 |
| C | -4.30573 | 5.32580 | -1.42098 |
| C | -1.84727 | 5.24066 | -1.40552 |
| C | 0.60450  | 5.25403 | -1.40707 |
| C | 3.06841  | 5.26287 | -1.41030 |
| C | 5.47739  | 5.43350 | -1.50982 |
| C | -5.49160 | 5.58314 | -0.68197 |
| C | -3.08190 | 5.39401 | -0.70960 |
| C | -0.61782 | 5.39031 | -0.70989 |
| C | 1.83403  | 5.38428 | -0.70757 |
| C | 4.29213  | 5.47355 | -0.72798 |
| C | -5.48939 | 5.58319 | 0.69610  |
| C | -3.07991 | 5.39336 | 0.71720  |
| C | -0.61585 | 5.38964 | 0.71145  |
| C | 1.83580  | 5.38343 | 0.70305  |
| C | 4.29400  | 5.47258 | 0.71679  |
| C | -4.30176 | 5.32594 | 1.43173  |
| C | -1.84357 | 5.23931 | 1.41004  |
| C | 0.60816  | 5.25225 | 1.40546  |
| C | 3.07206  | 5.26124 | 1.40230  |
| C | 5.48165  | 5.43084 | 1.49523  |
| C | -4.29962 | 4.77238 | 2.76646  |
| C | -1.84134 | 4.69988 | 2.71369  |
| C | 0.61046  | 4.70728 | 2.71811  |
| C | 3.07424  | 4.71503 | 2.72027  |
| C | 5.48374  | 4.90443 | 2.76894  |
| C | -5.48473 | 4.43360 | 3.47317  |
| C | -3.07539 | 4.31763 | 3.31642  |

|   |          |          |         |
|---|----------|----------|---------|
| C | -0.61146 | 4.31279  | 3.30999 |
| C | 1.84017  | 4.30413  | 3.30370 |
| C | 4.29822  | 4.38172  | 3.35198 |
| C | -5.48254 | 3.46099  | 4.44958 |
| C | -3.07286 | 3.30948  | 4.32597 |
| C | -0.60906 | 3.30799  | 4.31532 |
| C | 1.84230  | 3.30648  | 4.30118 |
| C | 4.30032  | 3.35873  | 4.37240 |
| C | -4.29452 | 2.75816  | 4.78625 |
| C | -1.83664 | 2.70922  | 4.70535 |
| C | 0.61480  | 2.71839  | 4.70760 |
| C | 3.07845  | 2.72456  | 4.70786 |
| C | 5.48790  | 2.77789  | 4.89254 |
| C | -4.29209 | 1.42316  | 5.33900 |
| C | -1.83470 | 1.40552  | 5.24437 |
| C | 0.61664  | 1.40540  | 5.25220 |
| C | 3.08048  | 1.40636  | 5.25366 |
| C | 5.48985  | 1.50493  | 5.42082 |
| C | -5.47754 | 0.68550  | 5.59987 |
| C | -3.06919 | 0.71055  | 5.40178 |
| C | -0.60571 | 0.70885  | 5.39230 |
| C | 1.84593  | 0.70460  | 5.37929 |
| C | 4.30417  | 0.72353  | 5.46523 |
| C | -5.47719 | -0.69272 | 5.59886 |
| C | -3.06856 | -0.71631 | 5.40116 |
| C | -0.60484 | -0.71251 | 5.39188 |
| C | 1.84687  | -0.70616 | 5.38040 |
| C | 4.30530  | -0.72143 | 5.46684 |
| C | -4.29111 | -1.42970 | 5.33722 |
| C | -1.83322 | -1.41046 | 5.24440 |
| C | 0.61848  | -1.40765 | 5.25259 |
| C | 3.08275  | -1.40632 | 5.25668 |
| C | 5.49216  | -1.50137 | 5.42410 |
| C | -4.29104 | -2.76477 | 4.78395 |
| C | -1.83299 | -2.71379 | 4.70457 |
| C | 0.61877  | -2.72063 | 4.70851 |
| C | 3.08306  | -2.72461 | 4.71146 |

|   |          |          |          |
|---|----------|----------|----------|
| C | 5.49261  | -2.77447 | 4.89610  |
| C | -5.47753 | -3.46988 | 4.44663  |
| C | -3.06854 | -3.31486 | 4.32442  |
| C | -0.60446 | -3.31106 | 4.31512  |
| C | 1.84757  | -3.30743 | 4.30373  |
| C | 4.30572  | -3.35729 | 4.37663  |
| C | -5.47802 | -4.44296 | 3.47029  |
| C | -3.06910 | -4.32254 | 3.31424  |
| C | -0.60521 | -4.31588 | 3.31005  |
| C | 1.84678  | -4.30426 | 3.30554  |
| C | 4.30463  | -4.37834 | 3.35454  |
| C | -4.29214 | -4.78040 | 2.76454  |
| C | -1.83428 | -4.70336 | 2.71222  |
| C | 0.61763  | -4.70864 | 2.71930  |
| C | 3.08153  | -4.71206 | 2.72181  |
| C | 5.49093  | -4.89773 | 2.77107  |
| C | -4.29283 | -5.33340 | 1.42964  |
| C | -1.83502 | -5.24311 | 1.40894  |
| C | 0.61666  | -5.25177 | 1.40580  |
| C | 3.08067  | -5.25697 | 1.40344  |
| C | 5.49031  | -5.42380 | 1.49738  |
| C | -5.48007 | -5.59232 | 0.69381  |
| C | -3.07075 | -5.39876 | 0.71546  |
| C | -0.60695 | -5.39089 | 0.71089  |
| C | 1.84488  | -5.38073 | 0.70364  |
| C | 4.30313  | -5.46761 | 0.71871  |
| C | -5.48143 | -5.58999 | -0.68433 |
| C | -3.07211 | -5.39774 | -0.71116 |
| C | -0.60824 | -5.39097 | -0.71043 |
| C | 1.84371  | -5.38190 | -0.70708 |
| C | 4.30208  | -5.46797 | -0.72594 |
| C | -4.29579 | -5.33069 | -1.42244 |
| C | -1.83757 | -5.24253 | -1.40684 |
| C | 0.61442  | -5.25258 | -1.40707 |
| C | 3.07849  | -5.25794 | -1.40884 |
| C | 5.48819  | -5.42281 | -1.50651 |
| C | -4.29727 | -4.77837 | -2.75740 |

|   |          |          |          |
|---|----------|----------|----------|
| C | -1.83885 | -4.70357 | -2.71051 |
| C | 0.61342  | -4.70803 | -2.71995 |
| C | 3.07767  | -4.70985 | -2.72595 |
| C | 5.48707  | -4.89509 | -2.77963 |
| C | -5.48458 | -4.44145 | -3.46128 |
| C | -3.07484 | -4.32292 | -3.31056 |
| C | -0.61057 | -4.31566 | -3.30952 |
| C | 1.84155  | -4.30237 | -3.30755 |
| C | 4.29976  | -4.37405 | -3.36004 |
| C | -5.48549 | -3.46953 | -4.43828 |
| C | -3.07606 | -3.31498 | -4.32025 |
| C | -0.61201 | -3.31062 | -4.31435 |
| C | 1.84020  | -3.30461 | -4.30489 |
| C | 4.29835  | -3.35150 | -4.38073 |
| C | -4.29944 | -2.76528 | -4.77839 |
| C | -1.84140 | -2.71338 | -4.70148 |
| C | 0.61045  | -2.71900 | -4.70799 |
| C | 3.07450  | -2.72002 | -4.71428 |
| C | 5.48384  | -2.76804 | -4.90322 |
| C | -4.30124 | -1.43013 | -5.33115 |
| C | -1.84337 | -1.40944 | -5.23984 |
| C | 0.60857  | -1.40536 | -5.25066 |
| C | 3.07239  | -1.40170 | -5.26034 |
| C | 5.48160  | -1.49549 | -5.43259 |
| C | -5.48849 | -0.69405 | -5.59066 |
| C | -3.07938 | -0.71599 | -5.39552 |
| C | -0.61554 | -0.71101 | -5.38859 |
| C | 1.83606  | -0.70235 | -5.38122 |
| C | 4.29411  | -0.71643 | -5.47482 |
| C | -5.49056 | 0.68435  | -5.58884 |
| C | -3.08138 | 0.71075  | -5.39462 |
| C | -0.61742 | 0.71031  | -5.38818 |
| C | 1.83420  | 0.70836  | -5.38149 |
| C | 4.29196  | 0.72887  | -5.47594 |
| H | 6.42247  | 1.08806  | -5.75616 |
| H | 6.41952  | 3.31363  | -4.83975 |
| H | -6.43890 | 3.18801  | -4.88933 |



|   |          |          |          |
|---|----------|----------|----------|
| H | -6.43887 | 4.88844  | -3.18673 |
| H | 6.42128  | 4.83340  | -3.30980 |
| H | 6.42301  | 5.74980  | -1.08485 |
| H | -6.43814 | 5.71049  | -1.19460 |
| H | -6.43445 | 5.71047  | 1.21147  |
| H | 6.42636  | 5.74728  | 1.06829  |
| H | 6.42992  | 4.82777  | 3.29224  |
| H | -6.43107 | 4.88709  | 3.20187  |
| H | -6.42711 | 3.18839  | 4.90611  |
| H | 6.43279  | 3.30298  | 4.81342  |
| H | 6.43626  | 1.08070  | 5.73584  |
| H | -6.42299 | 1.19919  | 5.73038  |
| H | -6.42239 | -1.20712 | 5.72850  |
| H | 6.43775  | -1.07492 | 5.73860  |
| H | 6.43850  | -3.29789 | 4.81718  |
| H | -6.42269 | -3.19825 | 4.90249  |
| H | -6.42359 | -4.89776 | 3.19851  |
| H | 6.43697  | -4.81866 | 3.29412  |
| H | 6.43579  | -5.73758 | 1.07027  |
| H | -6.42500 | -5.72179 | 1.20886  |
| H | -6.42744 | -5.71830 | -1.19762 |
| H | 6.43444  | -5.73728 | -1.08156 |
| H | 6.43240  | -4.81493 | -3.30381 |
| H | -6.42975 | -4.89535 | -3.18705 |
| H | -6.43134 | -3.19802 | -4.89268 |
| H | 6.43035  | -3.29062 | -4.82609 |
| H | 6.42636  | -1.06916 | -5.74993 |
| H | -6.43318 | -1.20942 | -5.72020 |
| H | -6.43683 | 1.19729  | -5.71683 |
| O | -0.00001 | 0.00000  | -0.00001 |
| W | 0.00000  | -1.64536 | -1.64536 |
| W | -0.00001 | 1.64537  | 1.64535  |
| W | 0.00000  | -1.64535 | 1.64534  |
| W | 0.00001  | 1.64534  | -1.64534 |
| W | -2.32687 | 0.00001  | 0.00000  |
| W | 2.32687  | -0.00001 | -0.00001 |
| O | 1.88435  | -1.33245 | -1.33244 |

|   |          |          |          |
|---|----------|----------|----------|
| O | 1.88433  | 1.33242  | 1.33243  |
| O | -1.88435 | 1.33245  | 1.33244  |
| O | -1.88434 | -1.33243 | -1.33244 |
| O | -0.00001 | 0.00000  | -2.66488 |
| O | -0.00000 | -2.66488 | -0.00000 |
| O | -0.00002 | -0.00000 | 2.66487  |
| O | -0.00000 | 2.66488  | 0.00000  |
| O | -1.88438 | 1.33247  | -1.33244 |
| O | -1.88438 | -1.33245 | 1.33246  |
| O | 1.88439  | -1.33246 | 1.33245  |
| O | 1.88439  | 1.33245  | -1.33245 |
| O | 0.00005  | -2.85845 | 2.85846  |
| O | -0.00000 | 2.85847  | -2.85843 |
| O | 4.04246  | -0.00001 | -0.00002 |
| O | -4.04246 | -0.00001 | 0.00003  |
| O | 0.00001  | -2.85848 | -2.85848 |
| O | -0.00001 | 2.85848  | 2.85848  |

**W<sub>6</sub>O<sub>19</sub><sup>2-</sup>@(8,8) h-CNT (y/z = 45°/39°)**

217

|   |           |          |           |
|---|-----------|----------|-----------|
| C | -4.294787 | 1.506703 | -5.436725 |
| C | -1.828680 | 1.475462 | -5.379228 |
| C | 0.621898  | 1.396144 | -5.257269 |
| C | 3.082130  | 1.338020 | -5.175802 |
| C | 5.505370  | 1.382048 | -5.234057 |
| C | -4.282270 | 2.873045 | -4.963825 |
| C | -1.816334 | 2.813083 | -4.884106 |
| C | 0.631646  | 2.707369 | -4.695652 |
| C | 3.090878  | 2.638989 | -4.576374 |
| C | 5.513563  | 2.629454 | -4.651678 |
| C | -5.482756 | 3.546987 | -4.591715 |
| C | -3.058016 | 3.431674 | -4.513994 |
| C | -0.592398 | 3.359635 | -4.395431 |
| C | 1.855043  | 3.256800 | -4.218150 |
| C | 4.316290  | 3.253085 | -4.204095 |
| C | -5.498347 | 4.443732 | -3.552272 |
| C | -3.077520 | 4.361794 | -3.417252 |

|   |           |          |           |
|---|-----------|----------|-----------|
| C | -0.609676 | 4.345730 | -3.356460 |
| C | 1.840239  | 4.302577 | -3.262445 |
| C | 4.299808  | 4.343250 | -3.252318 |
| C | -4.312515 | 4.731651 | -2.818197 |
| C | -1.854125 | 4.696931 | -2.760270 |
| C | 0.598365  | 4.742645 | -2.726129 |
| C | 3.064244  | 4.753353 | -2.680614 |
| C | 5.484486  | 4.902939 | -2.698045 |
| C | -4.334478 | 5.150125 | -1.433050 |
| C | -1.873445 | 5.148556 | -1.416825 |
| C | 0.576424  | 5.323935 | -1.417114 |
| C | 3.040403  | 5.428087 | -1.413805 |
| C | 5.464668  | 5.542846 | -1.482252 |
| C | -5.535102 | 5.291083 | -0.682931 |
| C | -3.113017 | 5.226105 | -0.712729 |
| C | -0.653581 | 5.355904 | -0.712050 |
| C | 1.794232  | 5.565568 | -0.715860 |
| C | 4.261026  | 5.661471 | -0.729173 |
| C | -5.533949 | 5.291180 | 0.694280  |
| C | -3.111685 | 5.227225 | 0.720108  |
| C | -0.651845 | 5.356621 | 0.714346  |
| C | 1.796349  | 5.564984 | 0.711775  |
| C | 4.264034  | 5.656024 | 0.716303  |
| C | -4.332072 | 5.150645 | 1.442251  |
| C | -1.870711 | 5.151257 | 1.422203  |
| C | 0.580046  | 5.323568 | 1.416575  |
| C | 3.044849  | 5.424390 | 1.405442  |
| C | 5.470884  | 5.525780 | 1.461802  |
| C | -4.307463 | 4.730310 | 2.826511  |
| C | -1.848557 | 4.698205 | 2.765224  |
| C | 0.604573  | 4.742904 | 2.726111  |
| C | 3.070950  | 4.749391 | 2.672336  |
| C | 5.493159  | 4.883417 | 2.676254  |
| C | -5.492327 | 4.439973 | 3.561311  |
| C | -3.071051 | 4.360275 | 3.422809  |
| C | -0.602634 | 4.345666 | 3.358605  |
| C | 1.847757  | 4.301332 | 3.259017  |

|   |           |           |          |
|---|-----------|-----------|----------|
| C | 4.307600  | 4.335397  | 3.239616 |
| C | -5.474415 | 3.543788  | 4.601018 |
| C | -3.049316 | 3.428776  | 4.518387 |
| C | -0.583682 | 3.357511  | 4.396074 |
| C | 1.863622  | 3.254394  | 4.214147 |
| C | 4.324570  | 3.248654  | 4.194603 |
| C | -4.272849 | 2.870497  | 4.971023 |
| C | -1.806920 | 2.810161  | 4.885903 |
| C | 0.640950  | 2.704579  | 4.694053 |
| C | 3.099849  | 2.635756  | 4.569981 |
| C | 5.522685  | 2.624923  | 4.639558 |
| C | -4.284530 | 1.505061  | 5.446777 |
| C | -1.818189 | 1.473570  | 5.384537 |
| C | 0.632328  | 1.394020  | 5.258640 |
| C | 3.092328  | 1.334706  | 5.169808 |
| C | 5.516243  | 1.375873  | 5.218238 |
| C | -5.491785 | 0.760868  | 5.574331 |
| C | -3.066817 | 0.776527  | 5.478379 |
| C | -0.604117 | 0.730421  | 5.457847 |
| C | 1.848627  | 0.662180  | 5.373797 |
| C | 4.310466  | 0.642930  | 5.400870 |
| C | -5.510107 | -0.606405 | 5.429456 |
| C | -3.088216 | -0.649984 | 5.329250 |
| C | -0.626407 | -0.701440 | 5.413962 |
| C | 1.826117  | -0.752742 | 5.477650 |
| C | 4.284000  | -0.792738 | 5.569806 |
| C | -4.321077 | -1.336976 | 5.158064 |
| C | -1.861055 | -1.364724 | 5.174561 |
| C | 0.584307  | -1.437269 | 5.328339 |
| C | 3.052169  | -1.487107 | 5.437341 |
| C | 5.473612  | -1.578050 | 5.586691 |
| C | -4.324493 | -2.651580 | 4.552069 |
| C | -1.863494 | -2.659630 | 4.597932 |
| C | 0.580292  | -2.769404 | 4.798615 |
| C | 3.046699  | -2.840928 | 4.945984 |
| C | 5.470182  | -2.864720 | 5.111548 |
| C | -5.515051 | -3.320442 | 4.157487 |

|   |           |           |           |
|---|-----------|-----------|-----------|
| C | -3.092260 | -3.241162 | 4.161169  |
| C | -0.633628 | -3.312242 | 4.300664  |
| C | 1.815745  | -3.408675 | 4.477293  |
| C | 4.278766  | -3.444209 | 4.582287  |
| C | -5.493763 | -4.362971 | 3.259386  |
| C | -3.068712 | -4.322202 | 3.220556  |
| C | -0.608013 | -4.346404 | 3.314895  |
| C | 1.844856  | -4.348437 | 3.407154  |
| C | 4.309752  | -4.352760 | 3.458539  |
| C | -4.280203 | -4.819641 | 2.673244  |
| C | -1.817392 | -4.766219 | 2.689929  |
| C | 0.636254  | -4.737824 | 2.760613  |
| C | 3.097169  | -4.664840 | 2.790056  |
| C | 5.523043  | -4.717989 | 2.810020  |
| C | -4.244176 | -5.532881 | 1.416768  |
| C | -1.785894 | -5.402655 | 1.419649  |
| C | 0.664502  | -5.239162 | 1.419965  |
| C | 3.122431  | -5.082785 | 1.418718  |
| C | 5.545102  | -5.115804 | 1.493369  |
| C | -5.432334 | -5.842000 | 0.690495  |
| C | -3.011725 | -5.650994 | 0.722852  |
| C | -0.545888 | -5.476437 | 0.717418  |
| C | 1.895365  | -5.249311 | 0.707147  |
| C | 4.355538  | -5.189012 | 0.719476  |
| C | -5.434024 | -5.839303 | -0.680620 |
| C | -3.013109 | -5.650611 | -0.718189 |
| C | -0.547271 | -5.475524 | -0.716256 |
| C | 1.894448  | -5.248557 | -0.710772 |
| C | 4.354752  | -5.188326 | -0.728231 |
| C | -4.246953 | -5.532232 | -1.409565 |
| C | -1.788489 | -5.402272 | -1.417050 |
| C | 0.662100  | -5.237450 | -1.420691 |
| C | 3.120400  | -5.081783 | -1.424896 |
| C | 5.543219  | -5.112665 | -1.504028 |
| C | -4.284887 | -4.822158 | -2.667763 |
| C | -1.821974 | -4.767285 | -2.687936 |
| C | 0.631951  | -4.736578 | -2.761502 |

|   |           |           |           |
|---|-----------|-----------|-----------|
| C | 3.093041  | -4.661945 | -2.795623 |
| C | 5.518964  | -4.713621 | -2.820418 |
| C | -5.499436 | -4.364833 | -3.251175 |
| C | -3.074488 | -4.324860 | -3.217395 |
| C | -0.613450 | -4.346812 | -3.314305 |
| C | 1.839480  | -4.345868 | -3.409882 |
| C | 4.304364  | -4.348684 | -3.466519 |
| C | -5.522412 | -3.321618 | -4.148434 |
| C | -3.099697 | -3.242918 | -4.156974 |
| C | -0.640858 | -3.312045 | -4.298987 |
| C | 1.808392  | -3.405896 | -4.479681 |
| C | 4.271392  | -3.439258 | -4.589902 |
| C | -4.332625 | -2.652507 | -4.544903 |
| C | -1.871537 | -2.659521 | -4.592626 |
| C | 0.571880  | -2.767817 | -4.797887 |
| C | 3.038109  | -2.837223 | -4.951295 |
| C | 5.461439  | -2.860012 | -5.123204 |
| C | -4.330514 | -1.336364 | -5.147800 |
| C | -1.870460 | -1.363247 | -5.165836 |
| C | 0.574525  | -1.434647 | -5.323855 |
| C | 3.042133  | -1.483596 | -5.442335 |
| C | 5.463016  | -1.574168 | -5.600866 |
| C | -5.520070 | -0.605354 | -5.416410 |
| C | -3.098117 | -0.648665 | -5.318495 |
| C | -0.636433 | -0.699282 | -5.405227 |
| C | 1.815759  | -0.749976 | -5.476287 |
| C | 4.273661  | -0.788627 | -5.578690 |
| C | -5.502066 | 0.762025  | -5.561038 |
| C | -3.077128 | 0.777974  | -5.468396 |
| C | -0.614806 | 0.732169  | -5.451115 |
| C | 1.838049  | 0.664752  | -5.374095 |
| C | 4.299724  | 0.647357  | -5.411535 |
| H | 6.458726  | 0.920200  | -5.473546 |
| H | 6.472740  | 3.101187  | -4.458594 |
| H | -6.427318 | 3.263159  | -5.048130 |
| H | -6.451931 | 4.851057  | -3.227145 |
| H | 6.441604  | 4.741586  | -3.185942 |

|   |           |           |           |
|---|-----------|-----------|-----------|
| H | 6.409836  | 5.851839  | -1.044556 |
| H | -6.492045 | 5.313674  | -1.196051 |
| H | -6.490086 | 5.311652  | 1.208953  |
| H | 6.415350  | 5.831736  | 1.020483  |
| H | 6.451580  | 4.716423  | 3.159568  |
| H | -6.446613 | 4.846894  | 3.237808  |
| H | -6.417542 | 3.262157  | 5.061661  |
| H | 6.481292  | 3.096825  | 4.444411  |
| H | 6.470188  | 0.911816  | 5.451161  |
| H | -6.439862 | 1.281289  | 5.675239  |
| H | -6.470024 | -1.115083 | 5.433655  |
| H | 6.419523  | -1.126328 | 5.873465  |
| H | 6.414900  | -3.395758 | 5.030507  |
| H | -6.479158 | -2.954156 | 4.498393  |
| H | -6.442611 | -4.771979 | 2.924369  |
| H | 6.471125  | -4.584670 | 3.322864  |
| H | 6.508543  | -5.288939 | 1.022574  |
| H | -6.375499 | -5.963051 | 1.216857  |
| H | -6.378098 | -5.961060 | -1.205203 |
| H | 6.507775  | -5.280666 | -1.033892 |
| H | 6.466199  | -4.573696 | -3.333009 |
| H | -6.447841 | -4.771032 | -2.911537 |
| H | -6.487310 | -2.953092 | -4.484647 |
| H | 6.406519  | -3.390736 | -5.044153 |
| H | 6.407671  | -1.122995 | -5.892581 |
| H | -6.479802 | -1.114416 | -5.421889 |
| H | -6.450229 | 1.282275  | -5.662253 |
| O | -0.005618 | -0.005285 | 0.001261  |
| W | 1.370853  | -0.959035 | -1.650206 |
| W | -1.384807 | 0.941522  | 1.649442  |
| W | 1.372431  | -0.963468 | 1.648676  |
| W | -1.385643 | 0.945572  | -1.644142 |
| W | -1.388429 | -1.918249 | 0.000129  |
| W | 1.375711  | 1.889642  | 0.003625  |
| O | 2.195177  | 0.765097  | -1.342625 |
| O | -0.003330 | 2.312457  | 1.347637  |
| O | -2.201633 | -0.786602 | 1.345849  |

|   |           |           |           |
|---|-----------|-----------|-----------|
| O | -0.012088 | -2.331007 | -1.341853 |
| O | -0.005745 | -0.007475 | -2.683002 |
| O | 2.184261  | -1.568248 | -0.001981 |
| O | -0.004627 | -0.016190 | 2.684830  |
| O | -2.203934 | 1.549323  | 0.003385  |
| O | -2.202289 | -0.783563 | -1.343781 |
| O | -0.009790 | -2.336255 | 1.336596  |
| O | 2.194788  | 0.762628  | 1.348608  |
| O | -0.003468 | 2.316057  | -1.339048 |
| O | 2.539364  | -1.609473 | 2.743609  |
| O | -2.548760 | 1.577527  | -2.751456 |
| O | 2.537423  | 3.166483  | 0.004887  |
| O | -2.565282 | -3.181754 | 0.000343  |
| O | 2.534897  | -1.603028 | -2.749120 |
| O | -2.549231 | 1.571158  | 2.757606  |

**W<sub>6</sub>O<sub>19</sub><sup>2-</sup>@(9,9) h-CNT (y/z = 0°/0°)**

241

|   |          |         |          |
|---|----------|---------|----------|
| C | -4.29132 | 2.48341 | -5.68987 |
| C | -1.83417 | 2.43659 | -5.59608 |
| C | 0.61785  | 2.42441 | -5.60623 |
| C | 3.08069  | 2.41775 | -5.62251 |
| C | 5.48963  | 2.52965 | -5.78889 |
| C | -4.28510 | 3.73369 | -4.96508 |
| C | -1.82847 | 3.65720 | -4.88914 |
| C | 0.62379  | 3.65361 | -4.89464 |
| C | 3.08707  | 3.65257 | -4.90772 |
| C | 5.49597  | 3.72268 | -5.09864 |
| C | -5.46769 | 4.40407 | -4.55663 |
| C | -3.06027 | 4.22098 | -4.44637 |
| C | -0.59702 | 4.20080 | -4.43760 |
| C | 1.85505  | 4.18835 | -4.43214 |
| C | 4.31278  | 4.24382 | -4.51231 |
| C | -5.46300 | 5.28943 | -3.50005 |
| C | -3.05532 | 5.13630 | -3.35167 |
| C | -0.59212 | 5.11179 | -3.34773 |
| C | 1.86004  | 5.09380 | -3.35052 |



|   |          |         |          |
|---|----------|---------|----------|
| C | 4.31804  | 5.17084 | -3.40353 |
| C | -4.27528 | 5.56754 | -2.77370 |
| C | -1.81835 | 5.46587 | -2.72551 |
| C | 0.63354  | 5.45978 | -2.73551 |
| C | 3.09714  | 5.46184 | -2.74610 |
| C | 5.50633  | 5.65189 | -2.79347 |
| C | -4.27173 | 6.05926 | -1.41462 |
| C | -1.81499 | 5.94658 | -1.39932 |
| C | 0.63650  | 5.94255 | -1.39978 |
| C | 3.10006  | 5.94809 | -1.40495 |
| C | 5.50857  | 6.12437 | -1.49866 |
| C | -5.45551 | 6.31290 | -0.67327 |
| C | -3.04836 | 6.09596 | -0.70095 |
| C | -0.58537 | 6.06975 | -0.70057 |
| C | 1.86640  | 6.05311 | -0.69913 |
| C | 4.32328  | 6.14703 | -0.71809 |
| C | -5.45383 | 6.31205 | 0.70546  |
| C | -3.04673 | 6.09429 | 0.72602  |
| C | -0.58404 | 6.06760 | 0.71986  |
| C | 1.86797  | 6.05078 | 0.71156  |
| C | 4.32477  | 6.14317 | 0.72691  |
| C | -4.26812 | 6.05605 | 1.44334  |
| C | -1.81218 | 5.94263 | 1.42151  |
| C | 0.63978  | 5.93849 | 1.41532  |
| C | 3.10282  | 5.94243 | 1.41461  |
| C | 5.51124  | 6.11828 | 1.50568  |
| C | -4.26865 | 5.56028 | 2.80107  |
| C | -1.81279 | 5.45845 | 2.74660  |
| C | 0.63910  | 5.45065 | 2.74936  |
| C | 3.10225  | 5.45165 | 2.75421  |
| C | 5.51069  | 5.64481 | 2.80033  |
| C | -5.45530 | 5.28061 | 3.52855  |
| C | -3.04824 | 5.12674 | 3.37500  |
| C | -0.58515 | 5.10156 | 3.36399  |
| C | 1.86652  | 5.08155 | 3.35996  |
| C | 4.32381  | 5.16078 | 3.41022  |
| C | -5.45844 | 4.39243 | 4.58278  |

|   |          |          |         |
|---|----------|----------|---------|
| C | -3.05137 | 4.20767  | 4.46648 |
| C | -0.58811 | 4.18665  | 4.45063 |
| C | 1.86342  | 4.17286  | 4.43861 |
| C | 4.32091  | 4.23055  | 4.51653 |
| C | -4.27543 | 3.71963  | 4.98698 |
| C | -1.81861 | 3.64205  | 4.90410 |
| C | 0.63317  | 3.63695  | 4.90258 |
| C | 3.09638  | 3.63642  | 4.91099 |
| C | 5.50466  | 3.70901  | 5.10094 |
| C | -4.28014 | 2.46622  | 5.70710 |
| C | -1.82343 | 2.41920  | 5.60742 |
| C | 0.62823  | 2.40571  | 5.61059 |
| C | 3.09147  | 2.39976  | 5.62240 |
| C | 5.49964  | 2.51404  | 5.78827 |
| C | -5.46854 | 1.78583  | 6.08110 |
| C | -3.06084 | 1.76351  | 5.87198 |
| C | -0.59786 | 1.74623  | 5.85431 |
| C | 1.85404  | 1.72899  | 5.84525 |
| C | 4.31097  | 1.75314  | 5.94132 |
| C | -5.47456 | 0.42824  | 6.31990 |
| C | -3.06693 | 0.35783  | 6.11750 |
| C | -0.60398 | 0.34727  | 6.09960 |
| C | 1.84807  | 0.33997  | 6.08914 |
| C | 4.30486  | 0.32950  | 6.19101 |
| C | -4.29231 | -0.34835 | 6.20020 |
| C | -1.83558 | -0.35938 | 6.09345 |
| C | 0.61635  | -0.36593 | 6.09703 |
| C | 3.07953  | -0.37696 | 6.10966 |
| C | 5.48690  | -0.44798 | 6.30634 |
| C | -4.29897 | -1.77147 | 5.94731 |
| C | -1.84223 | -1.74791 | 5.84612 |
| C | 0.60964  | -1.76414 | 5.84805 |
| C | 3.07279  | -1.78151 | 5.85970 |
| C | 5.48066  | -1.80496 | 6.06446 |
| C | -5.48840 | -2.53098 | 5.79371 |
| C | -3.08022 | -2.41774 | 5.62426 |
| C | -0.61690 | -2.42372 | 5.60635 |

|   |          |          |          |
|---|----------|----------|----------|
| C | 1.83473  | -2.43592 | 5.59556  |
| C | 4.29164  | -2.48381 | 5.68966  |
| C | -5.49440 | -3.72334 | 5.10175  |
| C | -3.08627 | -3.65173 | 4.90825  |
| C | -0.62324 | -3.65261 | 4.89426  |
| C | 1.82845  | -3.65593 | 4.88762  |
| C | 4.28519  | -3.73435 | 4.96500  |
| C | -4.31162 | -4.24325 | 4.51385  |
| C | -1.85463 | -4.18723 | 4.43190  |
| C | 0.59708  | -4.19972 | 4.43624  |
| C | 3.06008  | -4.22022 | 4.44470  |
| C | 5.46690  | -4.40743 | 4.55807  |
| C | -4.31676 | -5.17047 | 3.40514  |
| C | -1.85974 | -5.09198 | 3.34958  |
| C | 0.59154  | -5.11078 | 3.34647  |
| C | 3.05444  | -5.13591 | 3.35051  |
| C | 5.46123  | -5.29316 | 3.50146  |
| C | -5.50520 | -5.65229 | 2.79619  |
| C | -3.09669 | -5.46006 | 2.74528  |
| C | -0.63387 | -5.45834 | 2.73421  |
| C | 1.81744  | -5.46562 | 2.72458  |
| C | 4.27398  | -5.56916 | 2.77381  |
| C | -5.50869 | -6.12078 | 1.49956  |
| C | -3.10040 | -5.94590 | 1.40364  |
| C | -0.63751 | -5.94205 | 1.39880  |
| C | 1.81412  | -5.94643 | 1.39865  |
| C | 4.27068  | -6.06137 | 1.41490  |
| C | -4.32423 | -6.14300 | 0.71776  |
| C | -1.86700 | -6.05246 | 0.69761  |
| C | 0.58446  | -6.07014 | 0.70006  |
| C | 3.04757  | -6.09679 | 0.70076  |
| C | 5.45441  | -6.31581 | 0.67380  |
| C | -4.32587 | -6.14124 | -0.72756 |
| C | -1.86866 | -6.05094 | -0.71308 |
| C | 0.58286  | -6.06759 | -0.72027 |
| C | 3.04590  | -6.09396 | -0.72606 |
| C | 5.45281  | -6.31353 | -0.70485 |

|   |          |          |          |
|---|----------|----------|----------|
| C | -5.51212 | -6.11785 | -1.50729 |
| C | -3.10349 | -5.94230 | -1.41570 |
| C | -0.64045 | -5.93843 | -1.41647 |
| C | 1.81124  | -5.94102 | -1.42094 |
| C | 4.26756  | -6.05651 | -1.44277 |
| C | -5.51097 | -5.64569 | -2.80249 |
| C | -3.10244 | -5.45273 | -2.75562 |
| C | -0.63931 | -5.45082 | -2.75027 |
| C | 1.81232  | -5.45704 | -2.74575 |
| C | 4.26839  | -5.56072 | -2.80042 |
| C | -4.32380 | -5.16204 | -3.41226 |
| C | -1.86671 | -5.08289 | -3.36122 |
| C | 0.58507  | -5.10096 | -3.36432 |
| C | 3.04791  | -5.12605 | -3.37379 |
| C | 5.45440  | -5.28195 | -3.52892 |
| C | -4.32050 | -4.23109 | -4.51799 |
| C | -1.86350 | -4.17396 | -4.43973 |
| C | 0.58824  | -4.18658 | -4.45091 |
| C | 3.05121  | -4.20689 | -4.46511 |
| C | 5.45792  | -4.39251 | -4.58226 |
| C | -5.50393 | -3.70963 | -5.10362 |
| C | -3.09598 | -3.63701 | -4.91184 |
| C | -0.63319 | -3.63788 | -4.90319 |
| C | 1.81874  | -3.64181 | -4.90368 |
| C | 4.27516  | -3.71893 | -4.98563 |
| C | -5.49876 | -2.51453 | -5.79071 |
| C | -3.09087 | -2.40008 | -5.62312 |
| C | -0.62808 | -2.40662 | -5.61148 |
| C | 1.82366  | -2.41923 | -5.60747 |
| C | 4.28023  | -2.46615 | -5.70627 |
| C | -4.31007 | -1.75338 | -5.94258 |
| C | -1.85357 | -1.72897 | -5.84567 |
| C | 0.59809  | -1.74653 | -5.85457 |
| C | 3.06105  | -1.76360 | -5.87179 |
| C | 5.46896  | -1.78592 | -6.07961 |
| C | -4.30371 | -0.32956 | -6.19146 |
| C | -1.84724 | -0.33968 | -6.08877 |

|   |          |          |          |
|---|----------|----------|----------|
| C | 0.60446  | -0.34725 | -6.09851 |
| C | 3.06737  | -0.35804 | -6.11673 |
| C | 5.47504  | -0.42824 | -6.31711 |
| C | -5.48630 | 0.44731  | -6.30700 |
| C | -3.07864 | 0.37718  | -6.10914 |
| C | -0.61561 | 0.36645  | -6.09608 |
| C | 1.83607  | 0.35887  | -6.09208 |
| C | 4.29282  | 0.34859  | -6.19788 |
| C | -5.48016 | 1.80435  | -6.06464 |
| C | -3.07226 | 1.78189  | -5.85951 |
| C | -0.60898 | 1.76491  | -5.84797 |
| C | 1.84288  | 1.74783  | -5.84566 |
| C | 4.29968  | 1.77121  | -5.94368 |
| H | 6.43378  | 2.14599  | -6.15735 |
| H | 6.44491  | 4.22547  | -4.95380 |
| H | -6.41525 | 4.17923  | -5.03192 |
| H | -6.40700 | 5.72215  | -3.19027 |
| H | 6.45239  | 5.59405  | -3.31878 |
| H | 6.45623  | 6.41673  | -1.06191 |
| H | -6.40154 | 6.44787  | -1.18427 |
| H | -6.39870 | 6.44679  | 1.21864  |
| H | 6.45832  | 6.41154  | 1.06820  |
| H | 6.45714  | 5.58655  | 3.32488  |
| H | -6.39965 | 5.71434  | 3.22099  |
| H | -6.40540 | 4.16666  | 5.05893  |
| H | 6.45307  | 4.21320  | 4.95713  |
| H | 6.44435  | 2.13064  | 6.15544  |
| H | -6.41237 | 2.31683  | 6.12027  |
| H | -6.42288 | -0.04968 | 6.53567  |
| H | 6.43531  | 0.02888  | 6.52392  |
| H | 6.42448  | -2.33608 | 6.10156  |
| H | -6.43272 | -2.14844 | 6.16287  |
| H | -6.44306 | -4.22691 | 4.95751  |
| H | 6.41457  | -4.18414 | 5.03379  |
| H | 6.40461  | -5.72739 | 3.19205  |
| H | -6.45063 | -5.59547 | 3.32273  |
| H | -6.45674 | -6.41258 | 1.06331  |

|   |          |          |          |
|---|----------|----------|----------|
| H | 6.40037  | -6.45188 | 1.18465  |
| H | 6.39766  | -6.44816 | -1.21817 |
| H | -6.45933 | -6.41124 | -1.07022 |
| H | -6.45722 | -5.58827 | -3.32756 |
| H | 6.39867  | -5.71643 | -3.22224 |
| H | 6.40477  | -4.16667 | -5.05857 |
| H | -6.45225 | -4.21444 | -4.96142 |
| H | -6.44326 | -2.13145 | -6.15878 |
| H | 6.41270  | -2.31728 | -6.11862 |
| H | 6.42345  | 0.04971  | -6.53266 |
| H | -6.43461 | -0.02997 | -6.52429 |
| H | -6.42391 | 2.33561  | -6.10138 |
| O | 0.00001  | -0.00001 | -0.00001 |
| W | 2.32689  | -0.00150 | 0.00057  |
| W | -2.32689 | 0.00149  | -0.00058 |
| W | -0.00057 | 0.00127  | 2.32687  |
| W | 0.00056  | -0.00126 | -2.32686 |
| W | -0.00151 | -2.32686 | 0.00127  |
| W | 0.00152  | 2.32686  | -0.00126 |
| O | 1.88558  | 1.88313  | -0.00056 |
| O | -1.88312 | 1.88554  | -0.00148 |
| O | -1.88557 | -1.88313 | 0.00056  |
| O | 1.88313  | -1.88555 | 0.00148  |
| O | 1.88481  | -0.00225 | -1.88390 |
| O | 1.88389  | -0.00019 | 1.88481  |
| O | -1.88480 | 0.00223  | 1.88389  |
| O | -1.88389 | 0.00018  | -1.88481 |
| O | -0.00077 | -1.88540 | -1.88334 |
| O | -0.00168 | -1.88335 | 1.88540  |
| O | 0.00076  | 1.88541  | 1.88335  |
| O | 0.00167  | 1.88336  | -1.88540 |
| O | -0.00100 | 0.00225  | 4.04246  |
| O | 0.00096  | -0.00221 | -4.04246 |
| O | 0.00263  | 4.04246  | -0.00222 |
| O | -0.00262 | -4.04246 | 0.00224  |
| O | 4.04250  | -0.00259 | 0.00099  |
| O | -4.04250 | 0.00259  | -0.00099 |

**W<sub>6</sub>O<sub>19</sub><sup>2-</sup>@(9,9) h-CNT (y/z = 15°/0°)**

241

|   |          |         |          |
|---|----------|---------|----------|
| C | -4.29132 | 2.48341 | -5.68987 |
| C | -1.83417 | 2.43659 | -5.59608 |
| C | 0.61785  | 2.42441 | -5.60623 |
| C | 3.08069  | 2.41775 | -5.62251 |
| C | 5.48963  | 2.52965 | -5.78889 |
| C | -4.28510 | 3.73369 | -4.96508 |
| C | -1.82847 | 3.65720 | -4.88914 |
| C | 0.62379  | 3.65361 | -4.89464 |
| C | 3.08707  | 3.65257 | -4.90772 |
| C | 5.49597  | 3.72268 | -5.09864 |
| C | -5.46769 | 4.40407 | -4.55663 |
| C | -3.06027 | 4.22098 | -4.44637 |
| C | -0.59702 | 4.20080 | -4.43760 |
| C | 1.85505  | 4.18835 | -4.43214 |
| C | 4.31278  | 4.24382 | -4.51231 |
| C | -5.46300 | 5.28943 | -3.50005 |
| C | -3.05532 | 5.13630 | -3.35167 |
| C | -0.59212 | 5.11179 | -3.34773 |
| C | 1.86004  | 5.09380 | -3.35052 |
| C | 4.31804  | 5.17084 | -3.40353 |
| C | -4.27528 | 5.56754 | -2.77370 |
| C | -1.81835 | 5.46587 | -2.72551 |
| C | 0.63354  | 5.45978 | -2.73551 |
| C | 3.09714  | 5.46184 | -2.74610 |
| C | 5.50633  | 5.65189 | -2.79347 |
| C | -4.27173 | 6.05926 | -1.41462 |
| C | -1.81499 | 5.94658 | -1.39932 |
| C | 0.63650  | 5.94255 | -1.39978 |
| C | 3.10006  | 5.94809 | -1.40495 |
| C | 5.50857  | 6.12437 | -1.49866 |
| C | -5.45551 | 6.31290 | -0.67327 |
| C | -3.04836 | 6.09596 | -0.70095 |
| C | -0.58537 | 6.06975 | -0.70057 |
| C | 1.86640  | 6.05311 | -0.69913 |

|   |          |         |          |
|---|----------|---------|----------|
| C | 4.32328  | 6.14703 | -0.71809 |
| C | -5.45383 | 6.31205 | 0.70546  |
| C | -3.04673 | 6.09429 | 0.72602  |
| C | -0.58404 | 6.06760 | 0.71986  |
| C | 1.86797  | 6.05078 | 0.71156  |
| C | 4.32477  | 6.14317 | 0.72691  |
| C | -4.26812 | 6.05605 | 1.44334  |
| C | -1.81218 | 5.94263 | 1.42151  |
| C | 0.63978  | 5.93849 | 1.41532  |
| C | 3.10282  | 5.94243 | 1.41461  |
| C | 5.51124  | 6.11828 | 1.50568  |
| C | -4.26865 | 5.56028 | 2.80107  |
| C | -1.81279 | 5.45845 | 2.74660  |
| C | 0.63910  | 5.45065 | 2.74936  |
| C | 3.10225  | 5.45165 | 2.75421  |
| C | 5.51069  | 5.64481 | 2.80033  |
| C | -5.45530 | 5.28061 | 3.52855  |
| C | -3.04824 | 5.12674 | 3.37500  |
| C | -0.58515 | 5.10156 | 3.36399  |
| C | 1.86652  | 5.08155 | 3.35996  |
| C | 4.32381  | 5.16078 | 3.41022  |
| C | -5.45844 | 4.39243 | 4.58278  |
| C | -3.05137 | 4.20767 | 4.46648  |
| C | -0.58811 | 4.18665 | 4.45063  |
| C | 1.86342  | 4.17286 | 4.43861  |
| C | 4.32091  | 4.23055 | 4.51653  |
| C | -4.27543 | 3.71963 | 4.98698  |
| C | -1.81861 | 3.64205 | 4.90410  |
| C | 0.63317  | 3.63695 | 4.90258  |
| C | 3.09638  | 3.63642 | 4.91099  |
| C | 5.50466  | 3.70901 | 5.10094  |
| C | -4.28014 | 2.46622 | 5.70710  |
| C | -1.82343 | 2.41920 | 5.60742  |
| C | 0.62823  | 2.40571 | 5.61059  |
| C | 3.09147  | 2.39976 | 5.62240  |
| C | 5.49964  | 2.51404 | 5.78827  |
| C | -5.46854 | 1.78583 | 6.08110  |



|   |          |          |         |
|---|----------|----------|---------|
| C | -3.06084 | 1.76351  | 5.87198 |
| C | -0.59786 | 1.74623  | 5.85431 |
| C | 1.85404  | 1.72899  | 5.84525 |
| C | 4.31097  | 1.75314  | 5.94132 |
| C | -5.47456 | 0.42824  | 6.31990 |
| C | -3.06693 | 0.35783  | 6.11750 |
| C | -0.60398 | 0.34727  | 6.09960 |
| C | 1.84807  | 0.33997  | 6.08914 |
| C | 4.30486  | 0.32950  | 6.19101 |
| C | -4.29231 | -0.34835 | 6.20020 |
| C | -1.83558 | -0.35938 | 6.09345 |
| C | 0.61635  | -0.36593 | 6.09703 |
| C | 3.07953  | -0.37696 | 6.10966 |
| C | 5.48690  | -0.44798 | 6.30634 |
| C | -4.29897 | -1.77147 | 5.94731 |
| C | -1.84223 | -1.74791 | 5.84612 |
| C | 0.60964  | -1.76414 | 5.84805 |
| C | 3.07279  | -1.78151 | 5.85970 |
| C | 5.48066  | -1.80496 | 6.06446 |
| C | -5.48840 | -2.53098 | 5.79371 |
| C | -3.08022 | -2.41774 | 5.62426 |
| C | -0.61690 | -2.42372 | 5.60635 |
| C | 1.83473  | -2.43592 | 5.59556 |
| C | 4.29164  | -2.48381 | 5.68966 |
| C | -5.49440 | -3.72334 | 5.10175 |
| C | -3.08627 | -3.65173 | 4.90825 |
| C | -0.62324 | -3.65261 | 4.89426 |
| C | 1.82845  | -3.65593 | 4.88762 |
| C | 4.28519  | -3.73435 | 4.96500 |
| C | -4.31162 | -4.24325 | 4.51385 |
| C | -1.85463 | -4.18723 | 4.43190 |
| C | 0.59708  | -4.19972 | 4.43624 |
| C | 3.06008  | -4.22022 | 4.44470 |
| C | 5.46690  | -4.40743 | 4.55807 |
| C | -4.31676 | -5.17047 | 3.40514 |
| C | -1.85974 | -5.09198 | 3.34958 |
| C | 0.59154  | -5.11078 | 3.34647 |

|   |          |          |          |
|---|----------|----------|----------|
| C | 3.05444  | -5.13591 | 3.35051  |
| C | 5.46123  | -5.29316 | 3.50146  |
| C | -5.50520 | -5.65229 | 2.79619  |
| C | -3.09669 | -5.46006 | 2.74528  |
| C | -0.63387 | -5.45834 | 2.73421  |
| C | 1.81744  | -5.46562 | 2.72458  |
| C | 4.27398  | -5.56916 | 2.77381  |
| C | -5.50869 | -6.12078 | 1.49956  |
| C | -3.10040 | -5.94590 | 1.40364  |
| C | -0.63751 | -5.94205 | 1.39880  |
| C | 1.81412  | -5.94643 | 1.39865  |
| C | 4.27068  | -6.06137 | 1.41490  |
| C | -4.32423 | -6.14300 | 0.71776  |
| C | -1.86700 | -6.05246 | 0.69761  |
| C | 0.58446  | -6.07014 | 0.70006  |
| C | 3.04757  | -6.09679 | 0.70076  |
| C | 5.45441  | -6.31581 | 0.67380  |
| C | -4.32587 | -6.14124 | -0.72756 |
| C | -1.86866 | -6.05094 | -0.71308 |
| C | 0.58286  | -6.06759 | -0.72027 |
| C | 3.04590  | -6.09396 | -0.72606 |
| C | 5.45281  | -6.31353 | -0.70485 |
| C | -5.51212 | -6.11785 | -1.50729 |
| C | -3.10349 | -5.94230 | -1.41570 |
| C | -0.64045 | -5.93843 | -1.41647 |
| C | 1.81124  | -5.94102 | -1.42094 |
| C | 4.26756  | -6.05651 | -1.44277 |
| C | -5.51097 | -5.64569 | -2.80249 |
| C | -3.10244 | -5.45273 | -2.75562 |
| C | -0.63931 | -5.45082 | -2.75027 |
| C | 1.81232  | -5.45704 | -2.74575 |
| C | 4.26839  | -5.56072 | -2.80042 |
| C | -4.32380 | -5.16204 | -3.41226 |
| C | -1.86671 | -5.08289 | -3.36122 |
| C | 0.58507  | -5.10096 | -3.36432 |
| C | 3.04791  | -5.12605 | -3.37379 |
| C | 5.45440  | -5.28195 | -3.52892 |

|   |          |          |          |
|---|----------|----------|----------|
| C | -4.32050 | -4.23109 | -4.51799 |
| C | -1.86350 | -4.17396 | -4.43973 |
| C | 0.58824  | -4.18658 | -4.45091 |
| C | 3.05121  | -4.20689 | -4.46511 |
| C | 5.45792  | -4.39251 | -4.58226 |
| C | -5.50393 | -3.70963 | -5.10362 |
| C | -3.09598 | -3.63701 | -4.91184 |
| C | -0.63319 | -3.63788 | -4.90319 |
| C | 1.81874  | -3.64181 | -4.90368 |
| C | 4.27516  | -3.71893 | -4.98563 |
| C | -5.49876 | -2.51453 | -5.79071 |
| C | -3.09087 | -2.40008 | -5.62312 |
| C | -0.62808 | -2.40662 | -5.61148 |
| C | 1.82366  | -2.41923 | -5.60747 |
| C | 4.28023  | -2.46615 | -5.70627 |
| C | -4.31007 | -1.75338 | -5.94258 |
| C | -1.85357 | -1.72897 | -5.84567 |
| C | 0.59809  | -1.74653 | -5.85457 |
| C | 3.06105  | -1.76360 | -5.87179 |
| C | 5.46896  | -1.78592 | -6.07961 |
| C | -4.30371 | -0.32956 | -6.19146 |
| C | -1.84724 | -0.33968 | -6.08877 |
| C | 0.60446  | -0.34725 | -6.09851 |
| C | 3.06737  | -0.35804 | -6.11673 |
| C | 5.47504  | -0.42824 | -6.31711 |
| C | -5.48630 | 0.44731  | -6.30700 |
| C | -3.07864 | 0.37718  | -6.10914 |
| C | -0.61561 | 0.36645  | -6.09608 |
| C | 1.83607  | 0.35887  | -6.09208 |
| C | 4.29282  | 0.34859  | -6.19788 |
| C | -5.48016 | 1.80435  | -6.06464 |
| C | -3.07226 | 1.78189  | -5.85951 |
| C | -0.60898 | 1.76491  | -5.84797 |
| C | 1.84288  | 1.74783  | -5.84566 |
| C | 4.29968  | 1.77121  | -5.94368 |
| H | 6.43378  | 2.14599  | -6.15735 |
| H | 6.44491  | 4.22547  | -4.95380 |

|   |          |          |          |
|---|----------|----------|----------|
| H | -6.41525 | 4.17923  | -5.03192 |
| H | -6.40700 | 5.72215  | -3.19027 |
| H | 6.45239  | 5.59405  | -3.31878 |
| H | 6.45623  | 6.41673  | -1.06191 |
| H | -6.40154 | 6.44787  | -1.18427 |
| H | -6.39870 | 6.44679  | 1.21864  |
| H | 6.45832  | 6.41154  | 1.06820  |
| H | 6.45714  | 5.58655  | 3.32488  |
| H | -6.39965 | 5.71434  | 3.22099  |
| H | -6.40540 | 4.16666  | 5.05893  |
| H | 6.45307  | 4.21320  | 4.95713  |
| H | 6.44435  | 2.13064  | 6.15544  |
| H | -6.41237 | 2.31683  | 6.12027  |
| H | -6.42288 | -0.04968 | 6.53567  |
| H | 6.43531  | 0.02888  | 6.52392  |
| H | 6.42448  | -2.33608 | 6.10156  |
| H | -6.43272 | -2.14844 | 6.16287  |
| H | -6.44306 | -4.22691 | 4.95751  |
| H | 6.41457  | -4.18414 | 5.03379  |
| H | 6.40461  | -5.72739 | 3.19205  |
| H | -6.45063 | -5.59547 | 3.32273  |
| H | -6.45674 | -6.41258 | 1.06331  |
| H | 6.40037  | -6.45188 | 1.18465  |
| H | 6.39766  | -6.44816 | -1.21817 |
| H | -6.45933 | -6.41124 | -1.07022 |
| H | -6.45722 | -5.58827 | -3.32756 |
| H | 6.39867  | -5.71643 | -3.22224 |
| H | 6.40477  | -4.16667 | -5.05857 |
| H | -6.45225 | -4.21444 | -4.96142 |
| H | -6.44326 | -2.13145 | -6.15878 |
| H | 6.41270  | -2.31728 | -6.11862 |
| H | 6.42345  | 0.04971  | -6.53266 |
| H | -6.43461 | -0.02997 | -6.52429 |
| H | -6.42391 | 2.33561  | -6.10138 |
| O | 0.00000  | -0.00001 | -0.00001 |
| W | 2.24775  | -0.00150 | -0.60170 |
| W | -2.24775 | 0.00149  | 0.60168  |

|   |          |          |          |
|---|----------|----------|----------|
| W | 0.60169  | 0.00127  | 2.24773  |
| W | -0.60169 | -0.00126 | -2.24772 |
| W | -0.00113 | -2.32686 | 0.00162  |
| W | 0.00114  | 2.32686  | -0.00161 |
| O | 1.82118  | 1.88313  | -0.48857 |
| O | -1.81934 | 1.88554  | 0.48596  |
| O | -1.82118 | -1.88313 | 0.48856  |
| O | 1.81934  | -1.88555 | -0.48596 |
| O | 1.33300  | -0.00225 | -2.30753 |
| O | 2.30752  | -0.00019 | 1.33300  |
| O | -1.33300 | 0.00223  | 2.30752  |
| O | -2.30752 | 0.00018  | -1.33300 |
| O | -0.48819 | -1.88540 | -1.81897 |
| O | 0.48635  | -1.88335 | 1.82160  |
| O | 0.48818  | 1.88541  | 1.81898  |
| O | -0.48636 | 1.88336  | -1.82159 |
| O | 1.04530  | 0.00225  | 3.90497  |
| O | -1.04534 | -0.00221 | -3.90496 |
| O | 0.00197  | 4.04246  | -0.00283 |
| O | -0.00196 | -4.04246 | 0.00284  |
| O | 3.90501  | -0.00259 | -1.04532 |
| O | -3.90501 | 0.00259  | 1.04532  |

**W<sub>6</sub>O<sub>19</sub><sup>2-</sup>@(9,9) h-CNT (y/z = 30°/0°)**

241

|   |          |         |          |
|---|----------|---------|----------|
| C | -4.29132 | 2.48341 | -5.68987 |
| C | -1.83417 | 2.43659 | -5.59608 |
| C | 0.61785  | 2.42441 | -5.60623 |
| C | 3.08069  | 2.41775 | -5.62251 |
| C | 5.48963  | 2.52965 | -5.78889 |
| C | -4.28510 | 3.73369 | -4.96508 |
| C | -1.82847 | 3.65720 | -4.88914 |
| C | 0.62379  | 3.65361 | -4.89464 |
| C | 3.08707  | 3.65257 | -4.90772 |
| C | 5.49597  | 3.72268 | -5.09864 |
| C | -5.46769 | 4.40407 | -4.55663 |
| C | -3.06027 | 4.22098 | -4.44637 |

|   |          |         |          |
|---|----------|---------|----------|
| C | -0.59702 | 4.20080 | -4.43760 |
| C | 1.85505  | 4.18835 | -4.43214 |
| C | 4.31278  | 4.24382 | -4.51231 |
| C | -5.46300 | 5.28943 | -3.50005 |
| C | -3.05532 | 5.13630 | -3.35167 |
| C | -0.59212 | 5.11179 | -3.34773 |
| C | 1.86004  | 5.09380 | -3.35052 |
| C | 4.31804  | 5.17084 | -3.40353 |
| C | -4.27528 | 5.56754 | -2.77370 |
| C | -1.81835 | 5.46587 | -2.72551 |
| C | 0.63354  | 5.45978 | -2.73551 |
| C | 3.09714  | 5.46184 | -2.74610 |
| C | 5.50633  | 5.65189 | -2.79347 |
| C | -4.27173 | 6.05926 | -1.41462 |
| C | -1.81499 | 5.94658 | -1.39932 |
| C | 0.63650  | 5.94255 | -1.39978 |
| C | 3.10006  | 5.94809 | -1.40495 |
| C | 5.50857  | 6.12437 | -1.49866 |
| C | -5.45551 | 6.31290 | -0.67327 |
| C | -3.04836 | 6.09596 | -0.70095 |
| C | -0.58537 | 6.06975 | -0.70057 |
| C | 1.86640  | 6.05311 | -0.69913 |
| C | 4.32328  | 6.14703 | -0.71809 |
| C | -5.45383 | 6.31205 | 0.70546  |
| C | -3.04673 | 6.09429 | 0.72602  |
| C | -0.58404 | 6.06760 | 0.71986  |
| C | 1.86797  | 6.05078 | 0.71156  |
| C | 4.32477  | 6.14317 | 0.72691  |
| C | -4.26812 | 6.05605 | 1.44334  |
| C | -1.81218 | 5.94263 | 1.42151  |
| C | 0.63978  | 5.93849 | 1.41532  |
| C | 3.10282  | 5.94243 | 1.41461  |
| C | 5.51124  | 6.11828 | 1.50568  |
| C | -4.26865 | 5.56028 | 2.80107  |
| C | -1.81279 | 5.45845 | 2.74660  |
| C | 0.63910  | 5.45065 | 2.74936  |
| C | 3.10225  | 5.45165 | 2.75421  |

|   |          |          |         |
|---|----------|----------|---------|
| C | 5.51069  | 5.64481  | 2.80033 |
| C | -5.45530 | 5.28061  | 3.52855 |
| C | -3.04824 | 5.12674  | 3.37500 |
| C | -0.58515 | 5.10156  | 3.36399 |
| C | 1.86652  | 5.08155  | 3.35996 |
| C | 4.32381  | 5.16078  | 3.41022 |
| C | -5.45844 | 4.39243  | 4.58278 |
| C | -3.05137 | 4.20767  | 4.46648 |
| C | -0.58811 | 4.18665  | 4.45063 |
| C | 1.86342  | 4.17286  | 4.43861 |
| C | 4.32091  | 4.23055  | 4.51653 |
| C | -4.27543 | 3.71963  | 4.98698 |
| C | -1.81861 | 3.64205  | 4.90410 |
| C | 0.63317  | 3.63695  | 4.90258 |
| C | 3.09638  | 3.63642  | 4.91099 |
| C | 5.50466  | 3.70901  | 5.10094 |
| C | -4.28014 | 2.46622  | 5.70710 |
| C | -1.82343 | 2.41920  | 5.60742 |
| C | 0.62823  | 2.40571  | 5.61059 |
| C | 3.09147  | 2.39976  | 5.62240 |
| C | 5.49964  | 2.51404  | 5.78827 |
| C | -5.46854 | 1.78583  | 6.08110 |
| C | -3.06084 | 1.76351  | 5.87198 |
| C | -0.59786 | 1.74623  | 5.85431 |
| C | 1.85404  | 1.72899  | 5.84525 |
| C | 4.31097  | 1.75314  | 5.94132 |
| C | -5.47456 | 0.42824  | 6.31990 |
| C | -3.06693 | 0.35783  | 6.11750 |
| C | -0.60398 | 0.34727  | 6.09960 |
| C | 1.84807  | 0.33997  | 6.08914 |
| C | 4.30486  | 0.32950  | 6.19101 |
| C | -4.29231 | -0.34835 | 6.20020 |
| C | -1.83558 | -0.35938 | 6.09345 |
| C | 0.61635  | -0.36593 | 6.09703 |
| C | 3.07953  | -0.37696 | 6.10966 |
| C | 5.48690  | -0.44798 | 6.30634 |
| C | -4.29897 | -1.77147 | 5.94731 |

|   |          |          |         |
|---|----------|----------|---------|
| C | -1.84223 | -1.74791 | 5.84612 |
| C | 0.60964  | -1.76414 | 5.84805 |
| C | 3.07279  | -1.78151 | 5.85970 |
| C | 5.48066  | -1.80496 | 6.06446 |
| C | -5.48840 | -2.53098 | 5.79371 |
| C | -3.08022 | -2.41774 | 5.62426 |
| C | -0.61690 | -2.42372 | 5.60635 |
| C | 1.83473  | -2.43592 | 5.59556 |
| C | 4.29164  | -2.48381 | 5.68966 |
| C | -5.49440 | -3.72334 | 5.10175 |
| C | -3.08627 | -3.65173 | 4.90825 |
| C | -0.62324 | -3.65261 | 4.89426 |
| C | 1.82845  | -3.65593 | 4.88762 |
| C | 4.28519  | -3.73435 | 4.96500 |
| C | -4.31162 | -4.24325 | 4.51385 |
| C | -1.85463 | -4.18723 | 4.43190 |
| C | 0.59708  | -4.19972 | 4.43624 |
| C | 3.06008  | -4.22022 | 4.44470 |
| C | 5.46690  | -4.40743 | 4.55807 |
| C | -4.31676 | -5.17047 | 3.40514 |
| C | -1.85974 | -5.09198 | 3.34958 |
| C | 0.59154  | -5.11078 | 3.34647 |
| C | 3.05444  | -5.13591 | 3.35051 |
| C | 5.46123  | -5.29316 | 3.50146 |
| C | -5.50520 | -5.65229 | 2.79619 |
| C | -3.09669 | -5.46006 | 2.74528 |
| C | -0.63387 | -5.45834 | 2.73421 |
| C | 1.81744  | -5.46562 | 2.72458 |
| C | 4.27398  | -5.56916 | 2.77381 |
| C | -5.50869 | -6.12078 | 1.49956 |
| C | -3.10040 | -5.94590 | 1.40364 |
| C | -0.63751 | -5.94205 | 1.39880 |
| C | 1.81412  | -5.94643 | 1.39865 |
| C | 4.27068  | -6.06137 | 1.41490 |
| C | -4.32423 | -6.14300 | 0.71776 |
| C | -1.86700 | -6.05246 | 0.69761 |
| C | 0.58446  | -6.07014 | 0.70006 |



|   |          |          |          |
|---|----------|----------|----------|
| C | 3.04757  | -6.09679 | 0.70076  |
| C | 5.45441  | -6.31581 | 0.67380  |
| C | -4.32587 | -6.14124 | -0.72756 |
| C | -1.86866 | -6.05094 | -0.71308 |
| C | 0.58286  | -6.06759 | -0.72027 |
| C | 3.04590  | -6.09396 | -0.72606 |
| C | 5.45281  | -6.31353 | -0.70485 |
| C | -5.51212 | -6.11785 | -1.50729 |
| C | -3.10349 | -5.94230 | -1.41570 |
| C | -0.64045 | -5.93843 | -1.41647 |
| C | 1.81124  | -5.94102 | -1.42094 |
| C | 4.26756  | -6.05651 | -1.44277 |
| C | -5.51097 | -5.64569 | -2.80249 |
| C | -3.10244 | -5.45273 | -2.75562 |
| C | -0.63931 | -5.45082 | -2.75027 |
| C | 1.81232  | -5.45704 | -2.74575 |
| C | 4.26839  | -5.56072 | -2.80042 |
| C | -4.32380 | -5.16204 | -3.41226 |
| C | -1.86671 | -5.08289 | -3.36122 |
| C | 0.58507  | -5.10096 | -3.36432 |
| C | 3.04791  | -5.12605 | -3.37379 |
| C | 5.45440  | -5.28195 | -3.52892 |
| C | -4.32050 | -4.23109 | -4.51799 |
| C | -1.86350 | -4.17396 | -4.43973 |
| C | 0.58824  | -4.18658 | -4.45091 |
| C | 3.05121  | -4.20689 | -4.46511 |
| C | 5.45792  | -4.39251 | -4.58226 |
| C | -5.50393 | -3.70963 | -5.10362 |
| C | -3.09598 | -3.63701 | -4.91184 |
| C | -0.63319 | -3.63788 | -4.90319 |
| C | 1.81874  | -3.64181 | -4.90368 |
| C | 4.27516  | -3.71893 | -4.98563 |
| C | -5.49876 | -2.51453 | -5.79071 |
| C | -3.09087 | -2.40008 | -5.62312 |
| C | -0.62808 | -2.40662 | -5.61148 |
| C | 1.82366  | -2.41923 | -5.60747 |
| C | 4.28023  | -2.46615 | -5.70627 |

|   |          |          |          |
|---|----------|----------|----------|
| C | -4.31007 | -1.75338 | -5.94258 |
| C | -1.85357 | -1.72897 | -5.84567 |
| C | 0.59809  | -1.74653 | -5.85457 |
| C | 3.06105  | -1.76360 | -5.87179 |
| C | 5.46896  | -1.78592 | -6.07961 |
| C | -4.30371 | -0.32956 | -6.19146 |
| C | -1.84724 | -0.33968 | -6.08877 |
| C | 0.60446  | -0.34725 | -6.09851 |
| C | 3.06737  | -0.35804 | -6.11673 |
| C | 5.47504  | -0.42824 | -6.31711 |
| C | -5.48630 | 0.44731  | -6.30700 |
| C | -3.07864 | 0.37718  | -6.10914 |
| C | -0.61561 | 0.36645  | -6.09608 |
| C | 1.83607  | 0.35887  | -6.09208 |
| C | 4.29282  | 0.34859  | -6.19788 |
| C | -5.48016 | 1.80435  | -6.06464 |
| C | -3.07226 | 1.78189  | -5.85951 |
| C | -0.60898 | 1.76491  | -5.84797 |
| C | 1.84288  | 1.74783  | -5.84566 |
| C | 4.29968  | 1.77121  | -5.94368 |
| H | 6.43378  | 2.14599  | -6.15735 |
| H | 6.44491  | 4.22547  | -4.95380 |
| H | -6.41525 | 4.17923  | -5.03192 |
| H | -6.40700 | 5.72215  | -3.19027 |
| H | 6.45239  | 5.59405  | -3.31878 |
| H | 6.45623  | 6.41673  | -1.06191 |
| H | -6.40154 | 6.44787  | -1.18427 |
| H | -6.39870 | 6.44679  | 1.21864  |
| H | 6.45832  | 6.41154  | 1.06820  |
| H | 6.45714  | 5.58655  | 3.32488  |
| H | -6.39965 | 5.71434  | 3.22099  |
| H | -6.40540 | 4.16666  | 5.05893  |
| H | 6.45307  | 4.21320  | 4.95713  |
| H | 6.44435  | 2.13064  | 6.15544  |
| H | -6.41237 | 2.31683  | 6.12027  |
| H | -6.42288 | -0.04968 | 6.53567  |
| H | 6.43531  | 0.02888  | 6.52392  |

|   |          |          |          |
|---|----------|----------|----------|
| H | 6.42448  | -2.33608 | 6.10156  |
| H | -6.43272 | -2.14844 | 6.16287  |
| H | -6.44306 | -4.22691 | 4.95751  |
| H | 6.41457  | -4.18414 | 5.03379  |
| H | 6.40461  | -5.72739 | 3.19205  |
| H | -6.45063 | -5.59547 | 3.32273  |
| H | -6.45674 | -6.41258 | 1.06331  |
| H | 6.40037  | -6.45188 | 1.18465  |
| H | 6.39766  | -6.44816 | -1.21817 |
| H | -6.45933 | -6.41124 | -1.07022 |
| H | -6.45722 | -5.58827 | -3.32756 |
| H | 6.39867  | -5.71643 | -3.22224 |
| H | 6.40477  | -4.16667 | -5.05857 |
| H | -6.45225 | -4.21444 | -4.96142 |
| H | -6.44326 | -2.13145 | -6.15878 |
| H | 6.41270  | -2.31728 | -6.11862 |
| H | 6.42345  | 0.04971  | -6.53266 |
| H | -6.43461 | -0.02997 | -6.52429 |
| H | -6.42391 | 2.33561  | -6.10138 |
| O | 0.00000  | -0.00001 | -0.00001 |
| W | 2.01543  | -0.00150 | -1.16295 |
| W | -2.01543 | 0.00149  | 1.16294  |
| W | 1.16294  | 0.00127  | 2.01541  |
| W | -1.16294 | -0.00126 | -2.01540 |
| W | -0.00067 | -2.32686 | 0.00186  |
| W | 0.00068  | 2.32686  | -0.00185 |
| O | 1.63268  | 1.88313  | -0.94328 |
| O | -1.63157 | 1.88554  | 0.94028  |
| O | -1.63267 | -1.88313 | 0.94327  |
| O | 1.63158  | -1.88555 | -0.94028 |
| O | 0.69035  | -0.00225 | -2.57391 |
| O | 2.57390  | -0.00019 | 0.69035  |
| O | -0.69034 | 0.00223  | 2.57389  |
| O | -2.57390 | 0.00018  | -0.69035 |
| O | -0.94234 | -1.88540 | -1.63064 |
| O | 0.94124  | -1.88335 | 1.63365  |
| O | 0.94233  | 1.88541  | 1.63065  |

|   |          |          |          |
|---|----------|----------|----------|
| O | -0.94125 | 1.88336  | -1.63364 |
| O | 2.02037  | 0.00225  | 3.50137  |
| O | -2.02040 | -0.00221 | -3.50135 |
| O | 0.00117  | 4.04246  | -0.00324 |
| O | -0.00115 | -4.04246 | 0.00325  |
| O | 3.50140  | -0.00259 | -2.02039 |
| O | -3.50140 | 0.00259  | 2.02039  |

**W<sub>6</sub>O<sub>19</sub><sup>2-</sup>@(9,9) h-CNT (y/z = 45°/0°)**

241

|   |          |         |          |
|---|----------|---------|----------|
| C | -4.29132 | 2.48341 | -5.68987 |
| C | -1.83417 | 2.43659 | -5.59608 |
| C | 0.61785  | 2.42441 | -5.60623 |
| C | 3.08069  | 2.41775 | -5.62251 |
| C | 5.48963  | 2.52965 | -5.78889 |
| C | -4.28510 | 3.73369 | -4.96508 |
| C | -1.82847 | 3.65720 | -4.88914 |
| C | 0.62379  | 3.65361 | -4.89464 |
| C | 3.08707  | 3.65257 | -4.90772 |
| C | 5.49597  | 3.72268 | -5.09864 |
| C | -5.46769 | 4.40407 | -4.55663 |
| C | -3.06027 | 4.22098 | -4.44637 |
| C | -0.59702 | 4.20080 | -4.43760 |
| C | 1.85505  | 4.18835 | -4.43214 |
| C | 4.31278  | 4.24382 | -4.51231 |
| C | -5.46300 | 5.28943 | -3.50005 |
| C | -3.05532 | 5.13630 | -3.35167 |
| C | -0.59212 | 5.11179 | -3.34773 |
| C | 1.86004  | 5.09380 | -3.35052 |
| C | 4.31804  | 5.17084 | -3.40353 |
| C | -4.27528 | 5.56754 | -2.77370 |
| C | -1.81835 | 5.46587 | -2.72551 |
| C | 0.63354  | 5.45978 | -2.73551 |
| C | 3.09714  | 5.46184 | -2.74610 |
| C | 5.50633  | 5.65189 | -2.79347 |
| C | -4.27173 | 6.05926 | -1.41462 |
| C | -1.81499 | 5.94658 | -1.39932 |

|   |          |         |          |
|---|----------|---------|----------|
| C | 0.63650  | 5.94255 | -1.39978 |
| C | 3.10006  | 5.94809 | -1.40495 |
| C | 5.50857  | 6.12437 | -1.49866 |
| C | -5.45551 | 6.31290 | -0.67327 |
| C | -3.04836 | 6.09596 | -0.70095 |
| C | -0.58537 | 6.06975 | -0.70057 |
| C | 1.86640  | 6.05311 | -0.69913 |
| C | 4.32328  | 6.14703 | -0.71809 |
| C | -5.45383 | 6.31205 | 0.70546  |
| C | -3.04673 | 6.09429 | 0.72602  |
| C | -0.58404 | 6.06760 | 0.71986  |
| C | 1.86797  | 6.05078 | 0.71156  |
| C | 4.32477  | 6.14317 | 0.72691  |
| C | -4.26812 | 6.05605 | 1.44334  |
| C | -1.81218 | 5.94263 | 1.42151  |
| C | 0.63978  | 5.93849 | 1.41532  |
| C | 3.10282  | 5.94243 | 1.41461  |
| C | 5.51124  | 6.11828 | 1.50568  |
| C | -4.26865 | 5.56028 | 2.80107  |
| C | -1.81279 | 5.45845 | 2.74660  |
| C | 0.63910  | 5.45065 | 2.74936  |
| C | 3.10225  | 5.45165 | 2.75421  |
| C | 5.51069  | 5.64481 | 2.80033  |
| C | -5.45530 | 5.28061 | 3.52855  |
| C | -3.04824 | 5.12674 | 3.37500  |
| C | -0.58515 | 5.10156 | 3.36399  |
| C | 1.86652  | 5.08155 | 3.35996  |
| C | 4.32381  | 5.16078 | 3.41022  |
| C | -5.45844 | 4.39243 | 4.58278  |
| C | -3.05137 | 4.20767 | 4.46648  |
| C | -0.58811 | 4.18665 | 4.45063  |
| C | 1.86342  | 4.17286 | 4.43861  |
| C | 4.32091  | 4.23055 | 4.51653  |
| C | -4.27543 | 3.71963 | 4.98698  |
| C | -1.81861 | 3.64205 | 4.90410  |
| C | 0.63317  | 3.63695 | 4.90258  |
| C | 3.09638  | 3.63642 | 4.91099  |

|   |          |          |         |
|---|----------|----------|---------|
| C | 5.50466  | 3.70901  | 5.10094 |
| C | -4.28014 | 2.46622  | 5.70710 |
| C | -1.82343 | 2.41920  | 5.60742 |
| C | 0.62823  | 2.40571  | 5.61059 |
| C | 3.09147  | 2.39976  | 5.62240 |
| C | 5.49964  | 2.51404  | 5.78827 |
| C | -5.46854 | 1.78583  | 6.08110 |
| C | -3.06084 | 1.76351  | 5.87198 |
| C | -0.59786 | 1.74623  | 5.85431 |
| C | 1.85404  | 1.72899  | 5.84525 |
| C | 4.31097  | 1.75314  | 5.94132 |
| C | -5.47456 | 0.42824  | 6.31990 |
| C | -3.06693 | 0.35783  | 6.11750 |
| C | -0.60398 | 0.34727  | 6.09960 |
| C | 1.84807  | 0.33997  | 6.08914 |
| C | 4.30486  | 0.32950  | 6.19101 |
| C | -4.29231 | -0.34835 | 6.20020 |
| C | -1.83558 | -0.35938 | 6.09345 |
| C | 0.61635  | -0.36593 | 6.09703 |
| C | 3.07953  | -0.37696 | 6.10966 |
| C | 5.48690  | -0.44798 | 6.30634 |
| C | -4.29897 | -1.77147 | 5.94731 |
| C | -1.84223 | -1.74791 | 5.84612 |
| C | 0.60964  | -1.76414 | 5.84805 |
| C | 3.07279  | -1.78151 | 5.85970 |
| C | 5.48066  | -1.80496 | 6.06446 |
| C | -5.48840 | -2.53098 | 5.79371 |
| C | -3.08022 | -2.41774 | 5.62426 |
| C | -0.61690 | -2.42372 | 5.60635 |
| C | 1.83473  | -2.43592 | 5.59556 |
| C | 4.29164  | -2.48381 | 5.68966 |
| C | -5.49440 | -3.72334 | 5.10175 |
| C | -3.08627 | -3.65173 | 4.90825 |
| C | -0.62324 | -3.65261 | 4.89426 |
| C | 1.82845  | -3.65593 | 4.88762 |
| C | 4.28519  | -3.73435 | 4.96500 |
| C | -4.31162 | -4.24325 | 4.51385 |

|   |          |          |          |
|---|----------|----------|----------|
| C | -1.85463 | -4.18723 | 4.43190  |
| C | 0.59708  | -4.19972 | 4.43624  |
| C | 3.06008  | -4.22022 | 4.44470  |
| C | 5.46690  | -4.40743 | 4.55807  |
| C | -4.31676 | -5.17047 | 3.40514  |
| C | -1.85974 | -5.09198 | 3.34958  |
| C | 0.59154  | -5.11078 | 3.34647  |
| C | 3.05444  | -5.13591 | 3.35051  |
| C | 5.46123  | -5.29316 | 3.50146  |
| C | -5.50520 | -5.65229 | 2.79619  |
| C | -3.09669 | -5.46006 | 2.74528  |
| C | -0.63387 | -5.45834 | 2.73421  |
| C | 1.81744  | -5.46562 | 2.72458  |
| C | 4.27398  | -5.56916 | 2.77381  |
| C | -5.50869 | -6.12078 | 1.49956  |
| C | -3.10040 | -5.94590 | 1.40364  |
| C | -0.63751 | -5.94205 | 1.39880  |
| C | 1.81412  | -5.94643 | 1.39865  |
| C | 4.27068  | -6.06137 | 1.41490  |
| C | -4.32423 | -6.14300 | 0.71776  |
| C | -1.86700 | -6.05246 | 0.69761  |
| C | 0.58446  | -6.07014 | 0.70006  |
| C | 3.04757  | -6.09679 | 0.70076  |
| C | 5.45441  | -6.31581 | 0.67380  |
| C | -4.32587 | -6.14124 | -0.72756 |
| C | -1.86866 | -6.05094 | -0.71308 |
| C | 0.58286  | -6.06759 | -0.72027 |
| C | 3.04590  | -6.09396 | -0.72606 |
| C | 5.45281  | -6.31353 | -0.70485 |
| C | -5.51212 | -6.11785 | -1.50729 |
| C | -3.10349 | -5.94230 | -1.41570 |
| C | -0.64045 | -5.93843 | -1.41647 |
| C | 1.81124  | -5.94102 | -1.42094 |
| C | 4.26756  | -6.05651 | -1.44277 |
| C | -5.51097 | -5.64569 | -2.80249 |
| C | -3.10244 | -5.45273 | -2.75562 |
| C | -0.63931 | -5.45082 | -2.75027 |

|   |          |          |          |
|---|----------|----------|----------|
| C | 1.81232  | -5.45704 | -2.74575 |
| C | 4.26839  | -5.56072 | -2.80042 |
| C | -4.32380 | -5.16204 | -3.41226 |
| C | -1.86671 | -5.08289 | -3.36122 |
| C | 0.58507  | -5.10096 | -3.36432 |
| C | 3.04791  | -5.12605 | -3.37379 |
| C | 5.45440  | -5.28195 | -3.52892 |
| C | -4.32050 | -4.23109 | -4.51799 |
| C | -1.86350 | -4.17396 | -4.43973 |
| C | 0.58824  | -4.18658 | -4.45091 |
| C | 3.05121  | -4.20689 | -4.46511 |
| C | 5.45792  | -4.39251 | -4.58226 |
| C | -5.50393 | -3.70963 | -5.10362 |
| C | -3.09598 | -3.63701 | -4.91184 |
| C | -0.63319 | -3.63788 | -4.90319 |
| C | 1.81874  | -3.64181 | -4.90368 |
| C | 4.27516  | -3.71893 | -4.98563 |
| C | -5.49876 | -2.51453 | -5.79071 |
| C | -3.09087 | -2.40008 | -5.62312 |
| C | -0.62808 | -2.40662 | -5.61148 |
| C | 1.82366  | -2.41923 | -5.60747 |
| C | 4.28023  | -2.46615 | -5.70627 |
| C | -4.31007 | -1.75338 | -5.94258 |
| C | -1.85357 | -1.72897 | -5.84567 |
| C | 0.59809  | -1.74653 | -5.85457 |
| C | 3.06105  | -1.76360 | -5.87179 |
| C | 5.46896  | -1.78592 | -6.07961 |
| C | -4.30371 | -0.32956 | -6.19146 |
| C | -1.84724 | -0.33968 | -6.08877 |
| C | 0.60446  | -0.34725 | -6.09851 |
| C | 3.06737  | -0.35804 | -6.11673 |
| C | 5.47504  | -0.42824 | -6.31711 |
| C | -5.48630 | 0.44731  | -6.30700 |
| C | -3.07864 | 0.37718  | -6.10914 |
| C | -0.61561 | 0.36645  | -6.09608 |
| C | 1.83607  | 0.35887  | -6.09208 |
| C | 4.29282  | 0.34859  | -6.19788 |



|   |          |          |          |
|---|----------|----------|----------|
| C | -5.48016 | 1.80435  | -6.06464 |
| C | -3.07226 | 1.78189  | -5.85951 |
| C | -0.60898 | 1.76491  | -5.84797 |
| C | 1.84288  | 1.74783  | -5.84566 |
| C | 4.29968  | 1.77121  | -5.94368 |
| H | 6.43378  | 2.14599  | -6.15735 |
| H | 6.44491  | 4.22547  | -4.95380 |
| H | -6.41525 | 4.17923  | -5.03192 |
| H | -6.40700 | 5.72215  | -3.19027 |
| H | 6.45239  | 5.59405  | -3.31878 |
| H | 6.45623  | 6.41673  | -1.06191 |
| H | -6.40154 | 6.44787  | -1.18427 |
| H | -6.39870 | 6.44679  | 1.21864  |
| H | 6.45832  | 6.41154  | 1.06820  |
| H | 6.45714  | 5.58655  | 3.32488  |
| H | -6.39965 | 5.71434  | 3.22099  |
| H | -6.40540 | 4.16666  | 5.05893  |
| H | 6.45307  | 4.21320  | 4.95713  |
| H | 6.44435  | 2.13064  | 6.15544  |
| H | -6.41237 | 2.31683  | 6.12027  |
| H | -6.42288 | -0.04968 | 6.53567  |
| H | 6.43531  | 0.02888  | 6.52392  |
| H | 6.42448  | -2.33608 | 6.10156  |
| H | -6.43272 | -2.14844 | 6.16287  |
| H | -6.44306 | -4.22691 | 4.95751  |
| H | 6.41457  | -4.18414 | 5.03379  |
| H | 6.40461  | -5.72739 | 3.19205  |
| H | -6.45063 | -5.59547 | 3.32273  |
| H | -6.45674 | -6.41258 | 1.06331  |
| H | 6.40037  | -6.45188 | 1.18465  |
| H | 6.39766  | -6.44816 | -1.21817 |
| H | -6.45933 | -6.41124 | -1.07022 |
| H | -6.45722 | -5.58827 | -3.32756 |
| H | 6.39867  | -5.71643 | -3.22224 |
| H | 6.40477  | -4.16667 | -5.05857 |
| H | -6.45225 | -4.21444 | -4.96142 |
| H | -6.44326 | -2.13145 | -6.15878 |

|   |          |          |          |
|---|----------|----------|----------|
| H | 6.41270  | -2.31728 | -6.11862 |
| H | 6.42345  | 0.04971  | -6.53266 |
| H | -6.43461 | -0.02997 | -6.52429 |
| H | -6.42391 | 2.33561  | -6.10138 |
| O | -0.00000 | -0.00001 | -0.00001 |
| W | 1.64576  | -0.00150 | -1.64496 |
| W | -1.64577 | 0.00149  | 1.64495  |
| W | 1.64494  | 0.00127  | 1.64574  |
| W | -1.64494 | -0.00126 | -1.64574 |
| W | -0.00017 | -2.32686 | 0.00197  |
| W | 0.00018  | 2.32686  | -0.00197 |
| O | 1.33291  | 1.88313  | -1.33370 |
| O | -1.33261 | 1.88554  | 1.33052  |
| O | -1.33291 | -1.88313 | 1.33370  |
| O | 1.33262  | -1.88555 | -1.33053 |
| O | 0.00065  | -0.00225 | -2.66488 |
| O | 2.66487  | -0.00019 | 0.00065  |
| O | -0.00065 | 0.00223  | 2.66487  |
| O | -2.66487 | 0.00018  | -0.00065 |
| O | -1.33227 | -1.88540 | -1.33118 |
| O | 1.33199  | -1.88335 | 1.33437  |
| O | 1.33227  | 1.88541  | 1.33119  |
| O | -1.33199 | 1.88336  | -1.33436 |
| O | 2.85775  | 0.00225  | 2.85916  |
| O | -2.85777 | -0.00221 | -2.85913 |
| O | 0.00029  | 4.04246  | -0.00343 |
| O | -0.00027 | -4.04246 | 0.00344  |
| O | 2.85918  | -0.00259 | -2.85778 |
| O | -2.85918 | 0.00259  | 2.85778  |

**W<sub>6</sub>O<sub>19</sub><sup>2-</sup>@(9,9) h-CNT (y/z = 45°/15°)**

241

|   |          |         |          |
|---|----------|---------|----------|
| C | -4.29132 | 2.48341 | -5.68987 |
| C | -1.83417 | 2.43659 | -5.59608 |
| C | 0.61785  | 2.42441 | -5.60623 |
| C | 3.08069  | 2.41775 | -5.62251 |
| C | 5.48963  | 2.52965 | -5.78889 |

|   |          |         |          |
|---|----------|---------|----------|
| C | -4.28510 | 3.73369 | -4.96508 |
| C | -1.82847 | 3.65720 | -4.88914 |
| C | 0.62379  | 3.65361 | -4.89464 |
| C | 3.08707  | 3.65257 | -4.90772 |
| C | 5.49597  | 3.72268 | -5.09864 |
| C | -5.46769 | 4.40407 | -4.55663 |
| C | -3.06027 | 4.22098 | -4.44637 |
| C | -0.59702 | 4.20080 | -4.43760 |
| C | 1.85505  | 4.18835 | -4.43214 |
| C | 4.31278  | 4.24382 | -4.51231 |
| C | -5.46300 | 5.28943 | -3.50005 |
| C | -3.05532 | 5.13630 | -3.35167 |
| C | -0.59212 | 5.11179 | -3.34773 |
| C | 1.86004  | 5.09380 | -3.35052 |
| C | 4.31804  | 5.17084 | -3.40353 |
| C | -4.27528 | 5.56754 | -2.77370 |
| C | -1.81835 | 5.46587 | -2.72551 |
| C | 0.63354  | 5.45978 | -2.73551 |
| C | 3.09714  | 5.46184 | -2.74610 |
| C | 5.50633  | 5.65189 | -2.79347 |
| C | -4.27173 | 6.05926 | -1.41462 |
| C | -1.81499 | 5.94658 | -1.39932 |
| C | 0.63650  | 5.94255 | -1.39978 |
| C | 3.10006  | 5.94809 | -1.40495 |
| C | 5.50857  | 6.12437 | -1.49866 |
| C | -5.45551 | 6.31290 | -0.67327 |
| C | -3.04836 | 6.09596 | -0.70095 |
| C | -0.58537 | 6.06975 | -0.70057 |
| C | 1.86640  | 6.05311 | -0.69913 |
| C | 4.32328  | 6.14703 | -0.71809 |
| C | -5.45383 | 6.31205 | 0.70546  |
| C | -3.04673 | 6.09429 | 0.72602  |
| C | -0.58404 | 6.06760 | 0.71986  |
| C | 1.86797  | 6.05078 | 0.71156  |
| C | 4.32477  | 6.14317 | 0.72691  |
| C | -4.26812 | 6.05605 | 1.44334  |
| C | -1.81218 | 5.94263 | 1.42151  |

|   |          |         |         |
|---|----------|---------|---------|
| C | 0.63978  | 5.93849 | 1.41532 |
| C | 3.10282  | 5.94243 | 1.41461 |
| C | 5.51124  | 6.11828 | 1.50568 |
| C | -4.26865 | 5.56028 | 2.80107 |
| C | -1.81279 | 5.45845 | 2.74660 |
| C | 0.63910  | 5.45065 | 2.74936 |
| C | 3.10225  | 5.45165 | 2.75421 |
| C | 5.51069  | 5.64481 | 2.80033 |
| C | -5.45530 | 5.28061 | 3.52855 |
| C | -3.04824 | 5.12674 | 3.37500 |
| C | -0.58515 | 5.10156 | 3.36399 |
| C | 1.86652  | 5.08155 | 3.35996 |
| C | 4.32381  | 5.16078 | 3.41022 |
| C | -5.45844 | 4.39243 | 4.58278 |
| C | -3.05137 | 4.20767 | 4.46648 |
| C | -0.58811 | 4.18665 | 4.45063 |
| C | 1.86342  | 4.17286 | 4.43861 |
| C | 4.32091  | 4.23055 | 4.51653 |
| C | -4.27543 | 3.71963 | 4.98698 |
| C | -1.81861 | 3.64205 | 4.90410 |
| C | 0.63317  | 3.63695 | 4.90258 |
| C | 3.09638  | 3.63642 | 4.91099 |
| C | 5.50466  | 3.70901 | 5.10094 |
| C | -4.28014 | 2.46622 | 5.70710 |
| C | -1.82343 | 2.41920 | 5.60742 |
| C | 0.62823  | 2.40571 | 5.61059 |
| C | 3.09147  | 2.39976 | 5.62240 |
| C | 5.49964  | 2.51404 | 5.78827 |
| C | -5.46854 | 1.78583 | 6.08110 |
| C | -3.06084 | 1.76351 | 5.87198 |
| C | -0.59786 | 1.74623 | 5.85431 |
| C | 1.85404  | 1.72899 | 5.84525 |
| C | 4.31097  | 1.75314 | 5.94132 |
| C | -5.47456 | 0.42824 | 6.31990 |
| C | -3.06693 | 0.35783 | 6.11750 |
| C | -0.60398 | 0.34727 | 6.09960 |
| C | 1.84807  | 0.33997 | 6.08914 |

|   |          |          |         |
|---|----------|----------|---------|
| C | 4.30486  | 0.32950  | 6.19101 |
| C | -4.29231 | -0.34835 | 6.20020 |
| C | -1.83558 | -0.35938 | 6.09345 |
| C | 0.61635  | -0.36593 | 6.09703 |
| C | 3.07953  | -0.37696 | 6.10966 |
| C | 5.48690  | -0.44798 | 6.30634 |
| C | -4.29897 | -1.77147 | 5.94731 |
| C | -1.84223 | -1.74791 | 5.84612 |
| C | 0.60964  | -1.76414 | 5.84805 |
| C | 3.07279  | -1.78151 | 5.85970 |
| C | 5.48066  | -1.80496 | 6.06446 |
| C | -5.48840 | -2.53098 | 5.79371 |
| C | -3.08022 | -2.41774 | 5.62426 |
| C | -0.61690 | -2.42372 | 5.60635 |
| C | 1.83473  | -2.43592 | 5.59556 |
| C | 4.29164  | -2.48381 | 5.68966 |
| C | -5.49440 | -3.72334 | 5.10175 |
| C | -3.08627 | -3.65173 | 4.90825 |
| C | -0.62324 | -3.65261 | 4.89426 |
| C | 1.82845  | -3.65593 | 4.88762 |
| C | 4.28519  | -3.73435 | 4.96500 |
| C | -4.31162 | -4.24325 | 4.51385 |
| C | -1.85463 | -4.18723 | 4.43190 |
| C | 0.59708  | -4.19972 | 4.43624 |
| C | 3.06008  | -4.22022 | 4.44470 |
| C | 5.46690  | -4.40743 | 4.55807 |
| C | -4.31676 | -5.17047 | 3.40514 |
| C | -1.85974 | -5.09198 | 3.34958 |
| C | 0.59154  | -5.11078 | 3.34647 |
| C | 3.05444  | -5.13591 | 3.35051 |
| C | 5.46123  | -5.29316 | 3.50146 |
| C | -5.50520 | -5.65229 | 2.79619 |
| C | -3.09669 | -5.46006 | 2.74528 |
| C | -0.63387 | -5.45834 | 2.73421 |
| C | 1.81744  | -5.46562 | 2.72458 |
| C | 4.27398  | -5.56916 | 2.77381 |
| C | -5.50869 | -6.12078 | 1.49956 |

|   |          |          |          |
|---|----------|----------|----------|
| C | -3.10040 | -5.94590 | 1.40364  |
| C | -0.63751 | -5.94205 | 1.39880  |
| C | 1.81412  | -5.94643 | 1.39865  |
| C | 4.27068  | -6.06137 | 1.41490  |
| C | -4.32423 | -6.14300 | 0.71776  |
| C | -1.86700 | -6.05246 | 0.69761  |
| C | 0.58446  | -6.07014 | 0.70006  |
| C | 3.04757  | -6.09679 | 0.70076  |
| C | 5.45441  | -6.31581 | 0.67380  |
| C | -4.32587 | -6.14124 | -0.72756 |
| C | -1.86866 | -6.05094 | -0.71308 |
| C | 0.58286  | -6.06759 | -0.72027 |
| C | 3.04590  | -6.09396 | -0.72606 |
| C | 5.45281  | -6.31353 | -0.70485 |
| C | -5.51212 | -6.11785 | -1.50729 |
| C | -3.10349 | -5.94230 | -1.41570 |
| C | -0.64045 | -5.93843 | -1.41647 |
| C | 1.81124  | -5.94102 | -1.42094 |
| C | 4.26756  | -6.05651 | -1.44277 |
| C | -5.51097 | -5.64569 | -2.80249 |
| C | -3.10244 | -5.45273 | -2.75562 |
| C | -0.63931 | -5.45082 | -2.75027 |
| C | 1.81232  | -5.45704 | -2.74575 |
| C | 4.26839  | -5.56072 | -2.80042 |
| C | -4.32380 | -5.16204 | -3.41226 |
| C | -1.86671 | -5.08289 | -3.36122 |
| C | 0.58507  | -5.10096 | -3.36432 |
| C | 3.04791  | -5.12605 | -3.37379 |
| C | 5.45440  | -5.28195 | -3.52892 |
| C | -4.32050 | -4.23109 | -4.51799 |
| C | -1.86350 | -4.17396 | -4.43973 |
| C | 0.58824  | -4.18658 | -4.45091 |
| C | 3.05121  | -4.20689 | -4.46511 |
| C | 5.45792  | -4.39251 | -4.58226 |
| C | -5.50393 | -3.70963 | -5.10362 |
| C | -3.09598 | -3.63701 | -4.91184 |
| C | -0.63319 | -3.63788 | -4.90319 |

|   |          |          |          |
|---|----------|----------|----------|
| C | 1.81874  | -3.64181 | -4.90368 |
| C | 4.27516  | -3.71893 | -4.98563 |
| C | -5.49876 | -2.51453 | -5.79071 |
| C | -3.09087 | -2.40008 | -5.62312 |
| C | -0.62808 | -2.40662 | -5.61148 |
| C | 1.82366  | -2.41923 | -5.60747 |
| C | 4.28023  | -2.46615 | -5.70627 |
| C | -4.31007 | -1.75338 | -5.94258 |
| C | -1.85357 | -1.72897 | -5.84567 |
| C | 0.59809  | -1.74653 | -5.85457 |
| C | 3.06105  | -1.76360 | -5.87179 |
| C | 5.46896  | -1.78592 | -6.07961 |
| C | -4.30371 | -0.32956 | -6.19146 |
| C | -1.84724 | -0.33968 | -6.08877 |
| C | 0.60446  | -0.34725 | -6.09851 |
| C | 3.06737  | -0.35804 | -6.11673 |
| C | 5.47504  | -0.42824 | -6.31711 |
| C | -5.48630 | 0.44731  | -6.30700 |
| C | -3.07864 | 0.37718  | -6.10914 |
| C | -0.61561 | 0.36645  | -6.09608 |
| C | 1.83607  | 0.35887  | -6.09208 |
| C | 4.29282  | 0.34859  | -6.19788 |
| C | -5.48016 | 1.80435  | -6.06464 |
| C | -3.07226 | 1.78189  | -5.85951 |
| C | -0.60898 | 1.76491  | -5.84797 |
| C | 1.84288  | 1.74783  | -5.84566 |
| C | 4.29968  | 1.77121  | -5.94368 |
| H | 6.43378  | 2.14599  | -6.15735 |
| H | 6.44491  | 4.22547  | -4.95380 |
| H | -6.41525 | 4.17923  | -5.03192 |
| H | -6.40700 | 5.72215  | -3.19027 |
| H | 6.45239  | 5.59405  | -3.31878 |
| H | 6.45623  | 6.41673  | -1.06191 |
| H | -6.40154 | 6.44787  | -1.18427 |
| H | -6.39870 | 6.44679  | 1.21864  |
| H | 6.45832  | 6.41154  | 1.06820  |
| H | 6.45714  | 5.58655  | 3.32488  |

|   |          |          |          |
|---|----------|----------|----------|
| H | -6.39965 | 5.71434  | 3.22099  |
| H | -6.40540 | 4.16666  | 5.05893  |
| H | 6.45307  | 4.21320  | 4.95713  |
| H | 6.44435  | 2.13064  | 6.15544  |
| H | -6.41237 | 2.31683  | 6.12027  |
| H | -6.42288 | -0.04968 | 6.53567  |
| H | 6.43531  | 0.02888  | 6.52392  |
| H | 6.42448  | -2.33608 | 6.10156  |
| H | -6.43272 | -2.14844 | 6.16287  |
| H | -6.44306 | -4.22691 | 4.95751  |
| H | 6.41457  | -4.18414 | 5.03379  |
| H | 6.40461  | -5.72739 | 3.19205  |
| H | -6.45063 | -5.59547 | 3.32273  |
| H | -6.45674 | -6.41258 | 1.06331  |
| H | 6.40037  | -6.45188 | 1.18465  |
| H | 6.39766  | -6.44816 | -1.21817 |
| H | -6.45933 | -6.41124 | -1.07022 |
| H | -6.45722 | -5.58827 | -3.32756 |
| H | 6.39867  | -5.71643 | -3.22224 |
| H | 6.40477  | -4.16667 | -5.05857 |
| H | -6.45225 | -4.21444 | -4.96142 |
| H | -6.44326 | -2.13145 | -6.15878 |
| H | 6.41270  | -2.31728 | -6.11862 |
| H | 6.42345  | 0.04971  | -6.53266 |
| H | -6.43461 | -0.02997 | -6.52429 |
| H | -6.42391 | 2.33561  | -6.10138 |
| O | -0.00000 | -0.00000 | -0.00001 |
| W | 1.58929  | -0.42740 | -1.64496 |
| W | -1.58930 | 0.42739  | 1.64495  |
| W | 1.58922  | -0.42451 | 1.64574  |
| W | -1.58922 | 0.42452  | -1.64574 |
| W | -0.60240 | -2.24753 | 0.00197  |
| W | 0.60241  | 2.24753  | -0.00197 |
| O | 1.77488  | 1.47398  | -1.33370 |
| O | -0.79919 | 2.16620  | 1.33052  |
| O | -1.77488 | -1.47398 | 1.33370  |
| O | 0.79919  | -2.16621 | -1.33053 |



|   |          |          |          |
|---|----------|----------|----------|
| O | 0.00004  | -0.00234 | -2.66488 |
| O | 2.57402  | -0.68990 | 0.00065  |
| O | -0.00005 | 0.00232  | 2.66487  |
| O | -2.57402 | 0.68990  | -0.00065 |
| O | -1.77485 | -1.47634 | -1.33118 |
| O | 0.79916  | -2.16392 | 1.33437  |
| O | 1.77485  | 1.47635  | 1.33119  |
| O | -0.79916 | 2.16393  | -1.33436 |
| O | 2.76095  | -0.73746 | 2.85915  |
| O | -2.76096 | 0.73751  | -2.85913 |
| O | 1.04654  | 3.90464  | -0.00343 |
| O | -1.04653 | -3.90464 | 0.00344  |
| O | 2.76108  | -0.74251 | -2.85778 |
| O | -2.76108 | 0.74252  | 2.85778  |

**W<sub>6</sub>O<sub>19</sub><sup>2-</sup>@(9,9) h-CNT (y/z = 45°/30°)**

241

|   |          |         |          |
|---|----------|---------|----------|
| C | -4.29132 | 2.48341 | -5.68987 |
| C | -1.83417 | 2.43659 | -5.59608 |
| C | 0.61785  | 2.42441 | -5.60623 |
| C | 3.08069  | 2.41775 | -5.62251 |
| C | 5.48963  | 2.52965 | -5.78889 |
| C | -4.28510 | 3.73369 | -4.96508 |
| C | -1.82847 | 3.65720 | -4.88914 |
| C | 0.62379  | 3.65361 | -4.89464 |
| C | 3.08707  | 3.65257 | -4.90772 |
| C | 5.49597  | 3.72268 | -5.09864 |
| C | -5.46769 | 4.40407 | -4.55663 |
| C | -3.06027 | 4.22098 | -4.44637 |
| C | -0.59702 | 4.20080 | -4.43760 |
| C | 1.85505  | 4.18835 | -4.43214 |
| C | 4.31278  | 4.24382 | -4.51231 |
| C | -5.46300 | 5.28943 | -3.50005 |
| C | -3.05532 | 5.13630 | -3.35167 |
| C | -0.59212 | 5.11179 | -3.34773 |
| C | 1.86004  | 5.09380 | -3.35052 |
| C | 4.31804  | 5.17084 | -3.40353 |

|   |          |         |          |
|---|----------|---------|----------|
| C | -4.27528 | 5.56754 | -2.77370 |
| C | -1.81835 | 5.46587 | -2.72551 |
| C | 0.63354  | 5.45978 | -2.73551 |
| C | 3.09714  | 5.46184 | -2.74610 |
| C | 5.50633  | 5.65189 | -2.79347 |
| C | -4.27173 | 6.05926 | -1.41462 |
| C | -1.81499 | 5.94658 | -1.39932 |
| C | 0.63650  | 5.94255 | -1.39978 |
| C | 3.10006  | 5.94809 | -1.40495 |
| C | 5.50857  | 6.12437 | -1.49866 |
| C | -5.45551 | 6.31290 | -0.67327 |
| C | -3.04836 | 6.09596 | -0.70095 |
| C | -0.58537 | 6.06975 | -0.70057 |
| C | 1.86640  | 6.05311 | -0.69913 |
| C | 4.32328  | 6.14703 | -0.71809 |
| C | -5.45383 | 6.31205 | 0.70546  |
| C | -3.04673 | 6.09429 | 0.72602  |
| C | -0.58404 | 6.06760 | 0.71986  |
| C | 1.86797  | 6.05078 | 0.71156  |
| C | 4.32477  | 6.14317 | 0.72691  |
| C | -4.26812 | 6.05605 | 1.44334  |
| C | -1.81218 | 5.94263 | 1.42151  |
| C | 0.63978  | 5.93849 | 1.41532  |
| C | 3.10282  | 5.94243 | 1.41461  |
| C | 5.51124  | 6.11828 | 1.50568  |
| C | -4.26865 | 5.56028 | 2.80107  |
| C | -1.81279 | 5.45845 | 2.74660  |
| C | 0.63910  | 5.45065 | 2.74936  |
| C | 3.10225  | 5.45165 | 2.75421  |
| C | 5.51069  | 5.64481 | 2.80033  |
| C | -5.45530 | 5.28061 | 3.52855  |
| C | -3.04824 | 5.12674 | 3.37500  |
| C | -0.58515 | 5.10156 | 3.36399  |
| C | 1.86652  | 5.08155 | 3.35996  |
| C | 4.32381  | 5.16078 | 3.41022  |
| C | -5.45844 | 4.39243 | 4.58278  |
| C | -3.05137 | 4.20767 | 4.46648  |

|   |          |          |         |
|---|----------|----------|---------|
| C | -0.58811 | 4.18665  | 4.45063 |
| C | 1.86342  | 4.17286  | 4.43861 |
| C | 4.32091  | 4.23055  | 4.51653 |
| C | -4.27543 | 3.71963  | 4.98698 |
| C | -1.81861 | 3.64205  | 4.90410 |
| C | 0.63317  | 3.63695  | 4.90258 |
| C | 3.09638  | 3.63642  | 4.91099 |
| C | 5.50466  | 3.70901  | 5.10094 |
| C | -4.28014 | 2.46622  | 5.70710 |
| C | -1.82343 | 2.41920  | 5.60742 |
| C | 0.62823  | 2.40571  | 5.61059 |
| C | 3.09147  | 2.39976  | 5.62240 |
| C | 5.49964  | 2.51404  | 5.78827 |
| C | -5.46854 | 1.78583  | 6.08110 |
| C | -3.06084 | 1.76351  | 5.87198 |
| C | -0.59786 | 1.74623  | 5.85431 |
| C | 1.85404  | 1.72899  | 5.84525 |
| C | 4.31097  | 1.75314  | 5.94132 |
| C | -5.47456 | 0.42824  | 6.31990 |
| C | -3.06693 | 0.35783  | 6.11750 |
| C | -0.60398 | 0.34727  | 6.09960 |
| C | 1.84807  | 0.33997  | 6.08914 |
| C | 4.30486  | 0.32950  | 6.19101 |
| C | -4.29231 | -0.34835 | 6.20020 |
| C | -1.83558 | -0.35938 | 6.09345 |
| C | 0.61635  | -0.36593 | 6.09703 |
| C | 3.07953  | -0.37696 | 6.10966 |
| C | 5.48690  | -0.44798 | 6.30634 |
| C | -4.29897 | -1.77147 | 5.94731 |
| C | -1.84223 | -1.74791 | 5.84612 |
| C | 0.60964  | -1.76414 | 5.84805 |
| C | 3.07279  | -1.78151 | 5.85970 |
| C | 5.48066  | -1.80496 | 6.06446 |
| C | -5.48840 | -2.53098 | 5.79371 |
| C | -3.08022 | -2.41774 | 5.62426 |
| C | -0.61690 | -2.42372 | 5.60635 |
| C | 1.83473  | -2.43592 | 5.59556 |

|   |          |          |          |
|---|----------|----------|----------|
| C | 4.29164  | -2.48381 | 5.68966  |
| C | -5.49440 | -3.72334 | 5.10175  |
| C | -3.08627 | -3.65173 | 4.90825  |
| C | -0.62324 | -3.65261 | 4.89426  |
| C | 1.82845  | -3.65593 | 4.88762  |
| C | 4.28519  | -3.73435 | 4.96500  |
| C | -4.31162 | -4.24325 | 4.51385  |
| C | -1.85463 | -4.18723 | 4.43190  |
| C | 0.59708  | -4.19972 | 4.43624  |
| C | 3.06008  | -4.22022 | 4.44470  |
| C | 5.46690  | -4.40743 | 4.55807  |
| C | -4.31676 | -5.17047 | 3.40514  |
| C | -1.85974 | -5.09198 | 3.34958  |
| C | 0.59154  | -5.11078 | 3.34647  |
| C | 3.05444  | -5.13591 | 3.35051  |
| C | 5.46123  | -5.29316 | 3.50146  |
| C | -5.50520 | -5.65229 | 2.79619  |
| C | -3.09669 | -5.46006 | 2.74528  |
| C | -0.63387 | -5.45834 | 2.73421  |
| C | 1.81744  | -5.46562 | 2.72458  |
| C | 4.27398  | -5.56916 | 2.77381  |
| C | -5.50869 | -6.12078 | 1.49956  |
| C | -3.10040 | -5.94590 | 1.40364  |
| C | -0.63751 | -5.94205 | 1.39880  |
| C | 1.81412  | -5.94643 | 1.39865  |
| C | 4.27068  | -6.06137 | 1.41490  |
| C | -4.32423 | -6.14300 | 0.71776  |
| C | -1.86700 | -6.05246 | 0.69761  |
| C | 0.58446  | -6.07014 | 0.70006  |
| C | 3.04757  | -6.09679 | 0.70076  |
| C | 5.45441  | -6.31581 | 0.67380  |
| C | -4.32587 | -6.14124 | -0.72756 |
| C | -1.86866 | -6.05094 | -0.71308 |
| C | 0.58286  | -6.06759 | -0.72027 |
| C | 3.04590  | -6.09396 | -0.72606 |
| C | 5.45281  | -6.31353 | -0.70485 |
| C | -5.51212 | -6.11785 | -1.50729 |

|   |          |          |          |
|---|----------|----------|----------|
| C | -3.10349 | -5.94230 | -1.41570 |
| C | -0.64045 | -5.93843 | -1.41647 |
| C | 1.81124  | -5.94102 | -1.42094 |
| C | 4.26756  | -6.05651 | -1.44277 |
| C | -5.51097 | -5.64569 | -2.80249 |
| C | -3.10244 | -5.45273 | -2.75562 |
| C | -0.63931 | -5.45082 | -2.75027 |
| C | 1.81232  | -5.45704 | -2.74575 |
| C | 4.26839  | -5.56072 | -2.80042 |
| C | -4.32380 | -5.16204 | -3.41226 |
| C | -1.86671 | -5.08289 | -3.36122 |
| C | 0.58507  | -5.10096 | -3.36432 |
| C | 3.04791  | -5.12605 | -3.37379 |
| C | 5.45440  | -5.28195 | -3.52892 |
| C | -4.32050 | -4.23109 | -4.51799 |
| C | -1.86350 | -4.17396 | -4.43973 |
| C | 0.58824  | -4.18658 | -4.45091 |
| C | 3.05121  | -4.20689 | -4.46511 |
| C | 5.45792  | -4.39251 | -4.58226 |
| C | -5.50393 | -3.70963 | -5.10362 |
| C | -3.09598 | -3.63701 | -4.91184 |
| C | -0.63319 | -3.63788 | -4.90319 |
| C | 1.81874  | -3.64181 | -4.90368 |
| C | 4.27516  | -3.71893 | -4.98563 |
| C | -5.49876 | -2.51453 | -5.79071 |
| C | -3.09087 | -2.40008 | -5.62312 |
| C | -0.62808 | -2.40662 | -5.61148 |
| C | 1.82366  | -2.41923 | -5.60747 |
| C | 4.28023  | -2.46615 | -5.70627 |
| C | -4.31007 | -1.75338 | -5.94258 |
| C | -1.85357 | -1.72897 | -5.84567 |
| C | 0.59809  | -1.74653 | -5.85457 |
| C | 3.06105  | -1.76360 | -5.87179 |
| C | 5.46896  | -1.78592 | -6.07961 |
| C | -4.30371 | -0.32956 | -6.19146 |
| C | -1.84724 | -0.33968 | -6.08877 |
| C | 0.60446  | -0.34725 | -6.09851 |

|   |          |          |          |
|---|----------|----------|----------|
| C | 3.06737  | -0.35804 | -6.11673 |
| C | 5.47504  | -0.42824 | -6.31711 |
| C | -5.48630 | 0.44731  | -6.30700 |
| C | -3.07864 | 0.37718  | -6.10914 |
| C | -0.61561 | 0.36645  | -6.09608 |
| C | 1.83607  | 0.35887  | -6.09208 |
| C | 4.29282  | 0.34859  | -6.19788 |
| C | -5.48016 | 1.80435  | -6.06464 |
| C | -3.07226 | 1.78189  | -5.85951 |
| C | -0.60898 | 1.76491  | -5.84797 |
| C | 1.84288  | 1.74783  | -5.84566 |
| C | 4.29968  | 1.77121  | -5.94368 |
| H | 6.43378  | 2.14599  | -6.15735 |
| H | 6.44491  | 4.22547  | -4.95380 |
| H | -6.41525 | 4.17923  | -5.03192 |
| H | -6.40700 | 5.72215  | -3.19027 |
| H | 6.45239  | 5.59405  | -3.31878 |
| H | 6.45623  | 6.41673  | -1.06191 |
| H | -6.40154 | 6.44787  | -1.18427 |
| H | -6.39870 | 6.44679  | 1.21864  |
| H | 6.45832  | 6.41154  | 1.06820  |
| H | 6.45714  | 5.58655  | 3.32488  |
| H | -6.39965 | 5.71434  | 3.22099  |
| H | -6.40540 | 4.16666  | 5.05893  |
| H | 6.45307  | 4.21320  | 4.95713  |
| H | 6.44435  | 2.13064  | 6.15544  |
| H | -6.41237 | 2.31683  | 6.12027  |
| H | -6.42288 | -0.04968 | 6.53567  |
| H | 6.43531  | 0.02888  | 6.52392  |
| H | 6.42448  | -2.33608 | 6.10156  |
| H | -6.43272 | -2.14844 | 6.16287  |
| H | -6.44306 | -4.22691 | 4.95751  |
| H | 6.41457  | -4.18414 | 5.03379  |
| H | 6.40461  | -5.72739 | 3.19205  |
| H | -6.45063 | -5.59547 | 3.32273  |
| H | -6.45674 | -6.41258 | 1.06331  |
| H | 6.40037  | -6.45188 | 1.18465  |

|   |          |          |          |
|---|----------|----------|----------|
| H | 6.39766  | -6.44816 | -1.21817 |
| H | -6.45933 | -6.41124 | -1.07022 |
| H | -6.45722 | -5.58827 | -3.32756 |
| H | 6.39867  | -5.71643 | -3.22224 |
| H | 6.40477  | -4.16667 | -5.05857 |
| H | -6.45225 | -4.21444 | -4.96142 |
| H | -6.44326 | -2.13145 | -6.15878 |
| H | 6.41270  | -2.31728 | -6.11862 |
| H | 6.42345  | 0.04971  | -6.53266 |
| H | -6.43461 | -0.02997 | -6.52429 |
| H | -6.42391 | 2.33561  | -6.10138 |
| O | -0.00000 | -0.00000 | -0.00001 |
| W | 1.42452  | -0.82418 | -1.64496 |
| W | -1.42453 | 0.82417  | 1.64495  |
| W | 1.42520  | -0.82137 | 1.64574  |
| W | -1.42519 | 0.82138  | -1.64574 |
| W | -1.16358 | -2.01504 | 0.00197  |
| W | 1.16359  | 2.01504  | -0.00197 |
| O | 2.09589  | 0.96438  | -1.33370 |
| O | -0.21131 | 2.29923  | 1.33052  |
| O | -2.09589 | -0.96439 | 1.33370  |
| O | 0.21131  | -2.29924 | -1.33053 |
| O | -0.00057 | -0.00227 | -2.66488 |
| O | 2.30775  | -1.33260 | 0.00065  |
| O | 0.00055  | 0.00225  | 2.66487  |
| O | -2.30776 | 1.33260  | -0.00065 |
| O | -2.09648 | -0.96667 | -1.33118 |
| O | 0.21186  | -2.29703 | 1.33437  |
| O | 2.09649  | 0.96668  | 1.33119  |
| O | -0.21186 | 2.29703  | -1.33436 |
| O | 2.47601  | -1.42692 | 2.85915  |
| O | -2.47600 | 1.42697  | -2.85913 |
| O | 2.02148  | 3.50073  | -0.00343 |
| O | -2.02147 | -3.50073 | 0.00344  |
| O | 2.47482  | -1.43183 | -2.85778 |
| O | -2.47482 | 1.43184  | 2.85778  |

**W<sub>6</sub>O<sub>19</sub><sup>2-</sup>@(9,9) h-CNT (y/z = 45°/45°)**

241

|   |          |         |          |
|---|----------|---------|----------|
| C | -4.29132 | 2.48341 | -5.68987 |
| C | -1.83417 | 2.43659 | -5.59608 |
| C | 0.61785  | 2.42441 | -5.60623 |
| C | 3.08069  | 2.41775 | -5.62251 |
| C | 5.48963  | 2.52965 | -5.78889 |
| C | -4.28510 | 3.73369 | -4.96508 |
| C | -1.82847 | 3.65720 | -4.88914 |
| C | 0.62379  | 3.65361 | -4.89464 |
| C | 3.08707  | 3.65257 | -4.90772 |
| C | 5.49597  | 3.72268 | -5.09864 |
| C | -5.46769 | 4.40407 | -4.55663 |
| C | -3.06027 | 4.22098 | -4.44637 |
| C | -0.59702 | 4.20080 | -4.43760 |
| C | 1.85505  | 4.18835 | -4.43214 |
| C | 4.31278  | 4.24382 | -4.51231 |
| C | -5.46300 | 5.28943 | -3.50005 |
| C | -3.05532 | 5.13630 | -3.35167 |
| C | -0.59212 | 5.11179 | -3.34773 |
| C | 1.86004  | 5.09380 | -3.35052 |
| C | 4.31804  | 5.17084 | -3.40353 |
| C | -4.27528 | 5.56754 | -2.77370 |
| C | -1.81835 | 5.46587 | -2.72551 |
| C | 0.63354  | 5.45978 | -2.73551 |
| C | 3.09714  | 5.46184 | -2.74610 |
| C | 5.50633  | 5.65189 | -2.79347 |
| C | -4.27173 | 6.05926 | -1.41462 |
| C | -1.81499 | 5.94658 | -1.39932 |
| C | 0.63650  | 5.94255 | -1.39978 |
| C | 3.10006  | 5.94809 | -1.40495 |
| C | 5.50857  | 6.12437 | -1.49866 |
| C | -5.45551 | 6.31290 | -0.67327 |
| C | -3.04836 | 6.09596 | -0.70095 |
| C | -0.58537 | 6.06975 | -0.70057 |
| C | 1.86640  | 6.05311 | -0.69913 |
| C | 4.32328  | 6.14703 | -0.71809 |



|   |          |         |         |
|---|----------|---------|---------|
| C | -5.45383 | 6.31205 | 0.70546 |
| C | -3.04673 | 6.09429 | 0.72602 |
| C | -0.58404 | 6.06760 | 0.71986 |
| C | 1.86797  | 6.05078 | 0.71156 |
| C | 4.32477  | 6.14317 | 0.72691 |
| C | -4.26812 | 6.05605 | 1.44334 |
| C | -1.81218 | 5.94263 | 1.42151 |
| C | 0.63978  | 5.93849 | 1.41532 |
| C | 3.10282  | 5.94243 | 1.41461 |
| C | 5.51124  | 6.11828 | 1.50568 |
| C | -4.26865 | 5.56028 | 2.80107 |
| C | -1.81279 | 5.45845 | 2.74660 |
| C | 0.63910  | 5.45065 | 2.74936 |
| C | 3.10225  | 5.45165 | 2.75421 |
| C | 5.51069  | 5.64481 | 2.80033 |
| C | -5.45530 | 5.28061 | 3.52855 |
| C | -3.04824 | 5.12674 | 3.37500 |
| C | -0.58515 | 5.10156 | 3.36399 |
| C | 1.86652  | 5.08155 | 3.35996 |
| C | 4.32381  | 5.16078 | 3.41022 |
| C | -5.45844 | 4.39243 | 4.58278 |
| C | -3.05137 | 4.20767 | 4.46648 |
| C | -0.58811 | 4.18665 | 4.45063 |
| C | 1.86342  | 4.17286 | 4.43861 |
| C | 4.32091  | 4.23055 | 4.51653 |
| C | -4.27543 | 3.71963 | 4.98698 |
| C | -1.81861 | 3.64205 | 4.90410 |
| C | 0.63317  | 3.63695 | 4.90258 |
| C | 3.09638  | 3.63642 | 4.91099 |
| C | 5.50466  | 3.70901 | 5.10094 |
| C | -4.28014 | 2.46622 | 5.70710 |
| C | -1.82343 | 2.41920 | 5.60742 |
| C | 0.62823  | 2.40571 | 5.61059 |
| C | 3.09147  | 2.39976 | 5.62240 |
| C | 5.49964  | 2.51404 | 5.78827 |
| C | -5.46854 | 1.78583 | 6.08110 |
| C | -3.06084 | 1.76351 | 5.87198 |

|   |          |          |         |
|---|----------|----------|---------|
| C | -0.59786 | 1.74623  | 5.85431 |
| C | 1.85404  | 1.72899  | 5.84525 |
| C | 4.31097  | 1.75314  | 5.94132 |
| C | -5.47456 | 0.42824  | 6.31990 |
| C | -3.06693 | 0.35783  | 6.11750 |
| C | -0.60398 | 0.34727  | 6.09960 |
| C | 1.84807  | 0.33997  | 6.08914 |
| C | 4.30486  | 0.32950  | 6.19101 |
| C | -4.29231 | -0.34835 | 6.20020 |
| C | -1.83558 | -0.35938 | 6.09345 |
| C | 0.61635  | -0.36593 | 6.09703 |
| C | 3.07953  | -0.37696 | 6.10966 |
| C | 5.48690  | -0.44798 | 6.30634 |
| C | -4.29897 | -1.77147 | 5.94731 |
| C | -1.84223 | -1.74791 | 5.84612 |
| C | 0.60964  | -1.76414 | 5.84805 |
| C | 3.07279  | -1.78151 | 5.85970 |
| C | 5.48066  | -1.80496 | 6.06446 |
| C | -5.48840 | -2.53098 | 5.79371 |
| C | -3.08022 | -2.41774 | 5.62426 |
| C | -0.61690 | -2.42372 | 5.60635 |
| C | 1.83473  | -2.43592 | 5.59556 |
| C | 4.29164  | -2.48381 | 5.68966 |
| C | -5.49440 | -3.72334 | 5.10175 |
| C | -3.08627 | -3.65173 | 4.90825 |
| C | -0.62324 | -3.65261 | 4.89426 |
| C | 1.82845  | -3.65593 | 4.88762 |
| C | 4.28519  | -3.73435 | 4.96500 |
| C | -4.31162 | -4.24325 | 4.51385 |
| C | -1.85463 | -4.18723 | 4.43190 |
| C | 0.59708  | -4.19972 | 4.43624 |
| C | 3.06008  | -4.22022 | 4.44470 |
| C | 5.46690  | -4.40743 | 4.55807 |
| C | -4.31676 | -5.17047 | 3.40514 |
| C | -1.85974 | -5.09198 | 3.34958 |
| C | 0.59154  | -5.11078 | 3.34647 |
| C | 3.05444  | -5.13591 | 3.35051 |

|   |          |          |          |
|---|----------|----------|----------|
| C | 5.46123  | -5.29316 | 3.50146  |
| C | -5.50520 | -5.65229 | 2.79619  |
| C | -3.09669 | -5.46006 | 2.74528  |
| C | -0.63387 | -5.45834 | 2.73421  |
| C | 1.81744  | -5.46562 | 2.72458  |
| C | 4.27398  | -5.56916 | 2.77381  |
| C | -5.50869 | -6.12078 | 1.49956  |
| C | -3.10040 | -5.94590 | 1.40364  |
| C | -0.63751 | -5.94205 | 1.39880  |
| C | 1.81412  | -5.94643 | 1.39865  |
| C | 4.27068  | -6.06137 | 1.41490  |
| C | -4.32423 | -6.14300 | 0.71776  |
| C | -1.86700 | -6.05246 | 0.69761  |
| C | 0.58446  | -6.07014 | 0.70006  |
| C | 3.04757  | -6.09679 | 0.70076  |
| C | 5.45441  | -6.31581 | 0.67380  |
| C | -4.32587 | -6.14124 | -0.72756 |
| C | -1.86866 | -6.05094 | -0.71308 |
| C | 0.58286  | -6.06759 | -0.72027 |
| C | 3.04590  | -6.09396 | -0.72606 |
| C | 5.45281  | -6.31353 | -0.70485 |
| C | -5.51212 | -6.11785 | -1.50729 |
| C | -3.10349 | -5.94230 | -1.41570 |
| C | -0.64045 | -5.93843 | -1.41647 |
| C | 1.81124  | -5.94102 | -1.42094 |
| C | 4.26756  | -6.05651 | -1.44277 |
| C | -5.51097 | -5.64569 | -2.80249 |
| C | -3.10244 | -5.45273 | -2.75562 |
| C | -0.63931 | -5.45082 | -2.75027 |
| C | 1.81232  | -5.45704 | -2.74575 |
| C | 4.26839  | -5.56072 | -2.80042 |
| C | -4.32380 | -5.16204 | -3.41226 |
| C | -1.86671 | -5.08289 | -3.36122 |
| C | 0.58507  | -5.10096 | -3.36432 |
| C | 3.04791  | -5.12605 | -3.37379 |
| C | 5.45440  | -5.28195 | -3.52892 |
| C | -4.32050 | -4.23109 | -4.51799 |

|   |          |          |          |
|---|----------|----------|----------|
| C | -1.86350 | -4.17396 | -4.43973 |
| C | 0.58824  | -4.18658 | -4.45091 |
| C | 3.05121  | -4.20689 | -4.46511 |
| C | 5.45792  | -4.39251 | -4.58226 |
| C | -5.50393 | -3.70963 | -5.10362 |
| C | -3.09598 | -3.63701 | -4.91184 |
| C | -0.63319 | -3.63788 | -4.90319 |
| C | 1.81874  | -3.64181 | -4.90368 |
| C | 4.27516  | -3.71893 | -4.98563 |
| C | -5.49876 | -2.51453 | -5.79071 |
| C | -3.09087 | -2.40008 | -5.62312 |
| C | -0.62808 | -2.40662 | -5.61148 |
| C | 1.82366  | -2.41923 | -5.60747 |
| C | 4.28023  | -2.46615 | -5.70627 |
| C | -4.31007 | -1.75338 | -5.94258 |
| C | -1.85357 | -1.72897 | -5.84567 |
| C | 0.59809  | -1.74653 | -5.85457 |
| C | 3.06105  | -1.76360 | -5.87179 |
| C | 5.46896  | -1.78592 | -6.07961 |
| C | -4.30371 | -0.32956 | -6.19146 |
| C | -1.84724 | -0.33968 | -6.08877 |
| C | 0.60446  | -0.34725 | -6.09851 |
| C | 3.06737  | -0.35804 | -6.11673 |
| C | 5.47504  | -0.42824 | -6.31711 |
| C | -5.48630 | 0.44731  | -6.30700 |
| C | -3.07864 | 0.37718  | -6.10914 |
| C | -0.61561 | 0.36645  | -6.09608 |
| C | 1.83607  | 0.35887  | -6.09208 |
| C | 4.29282  | 0.34859  | -6.19788 |
| C | -5.48016 | 1.80435  | -6.06464 |
| C | -3.07226 | 1.78189  | -5.85951 |
| C | -0.60898 | 1.76491  | -5.84797 |
| C | 1.84288  | 1.74783  | -5.84566 |
| C | 4.29968  | 1.77121  | -5.94368 |
| H | 6.43378  | 2.14599  | -6.15735 |
| H | 6.44491  | 4.22547  | -4.95380 |
| H | -6.41525 | 4.17923  | -5.03192 |

|   |          |          |          |
|---|----------|----------|----------|
| H | -6.40700 | 5.72215  | -3.19027 |
| H | 6.45239  | 5.59405  | -3.31878 |
| H | 6.45623  | 6.41673  | -1.06191 |
| H | -6.40154 | 6.44787  | -1.18427 |
| H | -6.39870 | 6.44679  | 1.21864  |
| H | 6.45832  | 6.41154  | 1.06820  |
| H | 6.45714  | 5.58655  | 3.32488  |
| H | -6.39965 | 5.71434  | 3.22099  |
| H | -6.40540 | 4.16666  | 5.05893  |
| H | 6.45307  | 4.21320  | 4.95713  |
| H | 6.44435  | 2.13064  | 6.15544  |
| H | -6.41237 | 2.31683  | 6.12027  |
| H | -6.42288 | -0.04968 | 6.53567  |
| H | 6.43531  | 0.02888  | 6.52392  |
| H | 6.42448  | -2.33608 | 6.10156  |
| H | -6.43272 | -2.14844 | 6.16287  |
| H | -6.44306 | -4.22691 | 4.95751  |
| H | 6.41457  | -4.18414 | 5.03379  |
| H | 6.40461  | -5.72739 | 3.19205  |
| H | -6.45063 | -5.59547 | 3.32273  |
| H | -6.45674 | -6.41258 | 1.06331  |
| H | 6.40037  | -6.45188 | 1.18465  |
| H | 6.39766  | -6.44816 | -1.21817 |
| H | -6.45933 | -6.41124 | -1.07022 |
| H | -6.45722 | -5.58827 | -3.32756 |
| H | 6.39867  | -5.71643 | -3.22224 |
| H | 6.40477  | -4.16667 | -5.05857 |
| H | -6.45225 | -4.21444 | -4.96142 |
| H | -6.44326 | -2.13145 | -6.15878 |
| H | 6.41270  | -2.31728 | -6.11862 |
| H | 6.42345  | 0.04971  | -6.53266 |
| H | -6.43461 | -0.02997 | -6.52429 |
| H | -6.42391 | 2.33561  | -6.10138 |
| O | -0.00000 | -0.00000 | -0.00001 |
| W | 1.16267  | -1.16479 | -1.64496 |
| W | -1.16268 | 1.16479  | 1.64495  |
| W | 1.16405  | -1.16225 | 1.64574  |

|   |          |          |          |
|---|----------|----------|----------|
| W | -1.16404 | 1.16225  | -1.64574 |
| W | -1.64546 | -1.64522 | 0.00197  |
| W | 1.64547  | 1.64522  | -0.00197 |
| O | 2.27408  | 0.38907  | -1.33370 |
| O | 0.39098  | 2.27558  | 1.33052  |
| O | -2.27408 | -0.38907 | 1.33370  |
| O | -0.39098 | -2.27559 | -1.33053 |
| O | -0.00113 | -0.00205 | -2.66488 |
| O | 1.88422  | -1.88448 | 0.00065  |
| O | 0.00112  | 0.00203  | 2.66487  |
| O | -1.88422 | 1.88448  | -0.00065 |
| O | -2.27524 | -0.39112 | -1.33118 |
| O | -0.38987 | -2.27359 | 1.33437  |
| O | 2.27525  | 0.39113  | 1.33119  |
| O | 0.38987  | 2.27359  | -1.33436 |
| O | 2.02233  | -2.01914 | 2.85915  |
| O | -2.02231 | 2.01919  | -2.85913 |
| O | 2.85865  | 2.85825  | -0.00343 |
| O | -2.85864 | -2.85825 | 0.00344  |
| O | 2.01991  | -2.02358 | -2.85778 |
| O | -2.01991 | 2.02358  | 2.85778  |

**W<sub>6</sub>O<sub>19</sub><sup>2-</sup>@(9,9) h-CNT (y/z = 45°/60°)**

241

|   |          |         |          |
|---|----------|---------|----------|
| C | -4.29132 | 2.48341 | -5.68987 |
| C | -1.83417 | 2.43659 | -5.59608 |
| C | 0.61785  | 2.42441 | -5.60623 |
| C | 3.08069  | 2.41775 | -5.62251 |
| C | 5.48963  | 2.52965 | -5.78889 |
| C | -4.28510 | 3.73369 | -4.96508 |
| C | -1.82847 | 3.65720 | -4.88914 |
| C | 0.62379  | 3.65361 | -4.89464 |
| C | 3.08707  | 3.65257 | -4.90772 |
| C | 5.49597  | 3.72268 | -5.09864 |
| C | -5.46769 | 4.40407 | -4.55663 |
| C | -3.06027 | 4.22098 | -4.44637 |
| C | -0.59702 | 4.20080 | -4.43760 |

|   |          |         |          |
|---|----------|---------|----------|
| C | 1.85505  | 4.18835 | -4.43214 |
| C | 4.31278  | 4.24382 | -4.51231 |
| C | -5.46300 | 5.28943 | -3.50005 |
| C | -3.05532 | 5.13630 | -3.35167 |
| C | -0.59212 | 5.11179 | -3.34773 |
| C | 1.86004  | 5.09380 | -3.35052 |
| C | 4.31804  | 5.17084 | -3.40353 |
| C | -4.27528 | 5.56754 | -2.77370 |
| C | -1.81835 | 5.46587 | -2.72551 |
| C | 0.63354  | 5.45978 | -2.73551 |
| C | 3.09714  | 5.46184 | -2.74610 |
| C | 5.50633  | 5.65189 | -2.79347 |
| C | -4.27173 | 6.05926 | -1.41462 |
| C | -1.81499 | 5.94658 | -1.39932 |
| C | 0.63650  | 5.94255 | -1.39978 |
| C | 3.10006  | 5.94809 | -1.40495 |
| C | 5.50857  | 6.12437 | -1.49866 |
| C | -5.45551 | 6.31290 | -0.67327 |
| C | -3.04836 | 6.09596 | -0.70095 |
| C | -0.58537 | 6.06975 | -0.70057 |
| C | 1.86640  | 6.05311 | -0.69913 |
| C | 4.32328  | 6.14703 | -0.71809 |
| C | -5.45383 | 6.31205 | 0.70546  |
| C | -3.04673 | 6.09429 | 0.72602  |
| C | -0.58404 | 6.06760 | 0.71986  |
| C | 1.86797  | 6.05078 | 0.71156  |
| C | 4.32477  | 6.14317 | 0.72691  |
| C | -4.26812 | 6.05605 | 1.44334  |
| C | -1.81218 | 5.94263 | 1.42151  |
| C | 0.63978  | 5.93849 | 1.41532  |
| C | 3.10282  | 5.94243 | 1.41461  |
| C | 5.51124  | 6.11828 | 1.50568  |
| C | -4.26865 | 5.56028 | 2.80107  |
| C | -1.81279 | 5.45845 | 2.74660  |
| C | 0.63910  | 5.45065 | 2.74936  |
| C | 3.10225  | 5.45165 | 2.75421  |
| C | 5.51069  | 5.64481 | 2.80033  |

|   |          |          |         |
|---|----------|----------|---------|
| C | -5.45530 | 5.28061  | 3.52855 |
| C | -3.04824 | 5.12674  | 3.37500 |
| C | -0.58515 | 5.10156  | 3.36399 |
| C | 1.86652  | 5.08155  | 3.35996 |
| C | 4.32381  | 5.16078  | 3.41022 |
| C | -5.45844 | 4.39243  | 4.58278 |
| C | -3.05137 | 4.20767  | 4.46648 |
| C | -0.58811 | 4.18665  | 4.45063 |
| C | 1.86342  | 4.17286  | 4.43861 |
| C | 4.32091  | 4.23055  | 4.51653 |
| C | -4.27543 | 3.71963  | 4.98698 |
| C | -1.81861 | 3.64205  | 4.90410 |
| C | 0.63317  | 3.63695  | 4.90258 |
| C | 3.09638  | 3.63642  | 4.91099 |
| C | 5.50466  | 3.70901  | 5.10094 |
| C | -4.28014 | 2.46622  | 5.70710 |
| C | -1.82343 | 2.41920  | 5.60742 |
| C | 0.62823  | 2.40571  | 5.61059 |
| C | 3.09147  | 2.39976  | 5.62240 |
| C | 5.49964  | 2.51404  | 5.78827 |
| C | -5.46854 | 1.78583  | 6.08110 |
| C | -3.06084 | 1.76351  | 5.87198 |
| C | -0.59786 | 1.74623  | 5.85431 |
| C | 1.85404  | 1.72899  | 5.84525 |
| C | 4.31097  | 1.75314  | 5.94132 |
| C | -5.47456 | 0.42824  | 6.31990 |
| C | -3.06693 | 0.35783  | 6.11750 |
| C | -0.60398 | 0.34727  | 6.09960 |
| C | 1.84807  | 0.33997  | 6.08914 |
| C | 4.30486  | 0.32950  | 6.19101 |
| C | -4.29231 | -0.34835 | 6.20020 |
| C | -1.83558 | -0.35938 | 6.09345 |
| C | 0.61635  | -0.36593 | 6.09703 |
| C | 3.07953  | -0.37696 | 6.10966 |
| C | 5.48690  | -0.44798 | 6.30634 |
| C | -4.29897 | -1.77147 | 5.94731 |
| C | -1.84223 | -1.74791 | 5.84612 |



|   |          |          |         |
|---|----------|----------|---------|
| C | 0.60964  | -1.76414 | 5.84805 |
| C | 3.07279  | -1.78151 | 5.85970 |
| C | 5.48066  | -1.80496 | 6.06446 |
| C | -5.48840 | -2.53098 | 5.79371 |
| C | -3.08022 | -2.41774 | 5.62426 |
| C | -0.61690 | -2.42372 | 5.60635 |
| C | 1.83473  | -2.43592 | 5.59556 |
| C | 4.29164  | -2.48381 | 5.68966 |
| C | -5.49440 | -3.72334 | 5.10175 |
| C | -3.08627 | -3.65173 | 4.90825 |
| C | -0.62324 | -3.65261 | 4.89426 |
| C | 1.82845  | -3.65593 | 4.88762 |
| C | 4.28519  | -3.73435 | 4.96500 |
| C | -4.31162 | -4.24325 | 4.51385 |
| C | -1.85463 | -4.18723 | 4.43190 |
| C | 0.59708  | -4.19972 | 4.43624 |
| C | 3.06008  | -4.22022 | 4.44470 |
| C | 5.46690  | -4.40743 | 4.55807 |
| C | -4.31676 | -5.17047 | 3.40514 |
| C | -1.85974 | -5.09198 | 3.34958 |
| C | 0.59154  | -5.11078 | 3.34647 |
| C | 3.05444  | -5.13591 | 3.35051 |
| C | 5.46123  | -5.29316 | 3.50146 |
| C | -5.50520 | -5.65229 | 2.79619 |
| C | -3.09669 | -5.46006 | 2.74528 |
| C | -0.63387 | -5.45834 | 2.73421 |
| C | 1.81744  | -5.46562 | 2.72458 |
| C | 4.27398  | -5.56916 | 2.77381 |
| C | -5.50869 | -6.12078 | 1.49956 |
| C | -3.10040 | -5.94590 | 1.40364 |
| C | -0.63751 | -5.94205 | 1.39880 |
| C | 1.81412  | -5.94643 | 1.39865 |
| C | 4.27068  | -6.06137 | 1.41490 |
| C | -4.32423 | -6.14300 | 0.71776 |
| C | -1.86700 | -6.05246 | 0.69761 |
| C | 0.58446  | -6.07014 | 0.70006 |
| C | 3.04757  | -6.09679 | 0.70076 |

|   |          |          |          |
|---|----------|----------|----------|
| C | 5.45441  | -6.31581 | 0.67380  |
| C | -4.32587 | -6.14124 | -0.72756 |
| C | -1.86866 | -6.05094 | -0.71308 |
| C | 0.58286  | -6.06759 | -0.72027 |
| C | 3.04590  | -6.09396 | -0.72606 |
| C | 5.45281  | -6.31353 | -0.70485 |
| C | -5.51212 | -6.11785 | -1.50729 |
| C | -3.10349 | -5.94230 | -1.41570 |
| C | -0.64045 | -5.93843 | -1.41647 |
| C | 1.81124  | -5.94102 | -1.42094 |
| C | 4.26756  | -6.05651 | -1.44277 |
| C | -5.51097 | -5.64569 | -2.80249 |
| C | -3.10244 | -5.45273 | -2.75562 |
| C | -0.63931 | -5.45082 | -2.75027 |
| C | 1.81232  | -5.45704 | -2.74575 |
| C | 4.26839  | -5.56072 | -2.80042 |
| C | -4.32380 | -5.16204 | -3.41226 |
| C | -1.86671 | -5.08289 | -3.36122 |
| C | 0.58507  | -5.10096 | -3.36432 |
| C | 3.04791  | -5.12605 | -3.37379 |
| C | 5.45440  | -5.28195 | -3.52892 |
| C | -4.32050 | -4.23109 | -4.51799 |
| C | -1.86350 | -4.17396 | -4.43973 |
| C | 0.58824  | -4.18658 | -4.45091 |
| C | 3.05121  | -4.20689 | -4.46511 |
| C | 5.45792  | -4.39251 | -4.58226 |
| C | -5.50393 | -3.70963 | -5.10362 |
| C | -3.09598 | -3.63701 | -4.91184 |
| C | -0.63319 | -3.63788 | -4.90319 |
| C | 1.81874  | -3.64181 | -4.90368 |
| C | 4.27516  | -3.71893 | -4.98563 |
| C | -5.49876 | -2.51453 | -5.79071 |
| C | -3.09087 | -2.40008 | -5.62312 |
| C | -0.62808 | -2.40662 | -5.61148 |
| C | 1.82366  | -2.41923 | -5.60747 |
| C | 4.28023  | -2.46615 | -5.70627 |
| C | -4.31007 | -1.75338 | -5.94258 |

|   |          |          |          |
|---|----------|----------|----------|
| C | -1.85357 | -1.72897 | -5.84567 |
| C | 0.59809  | -1.74653 | -5.85457 |
| C | 3.06105  | -1.76360 | -5.87179 |
| C | 5.46896  | -1.78592 | -6.07961 |
| C | -4.30371 | -0.32956 | -6.19146 |
| C | -1.84724 | -0.33968 | -6.08877 |
| C | 0.60446  | -0.34725 | -6.09851 |
| C | 3.06737  | -0.35804 | -6.11673 |
| C | 5.47504  | -0.42824 | -6.31711 |
| C | -5.48630 | 0.44731  | -6.30700 |
| C | -3.07864 | 0.37718  | -6.10914 |
| C | -0.61561 | 0.36645  | -6.09608 |
| C | 1.83607  | 0.35887  | -6.09208 |
| C | 4.29282  | 0.34859  | -6.19788 |
| C | -5.48016 | 1.80435  | -6.06464 |
| C | -3.07226 | 1.78189  | -5.85951 |
| C | -0.60898 | 1.76491  | -5.84797 |
| C | 1.84288  | 1.74783  | -5.84566 |
| C | 4.29968  | 1.77121  | -5.94368 |
| H | 6.43378  | 2.14599  | -6.15735 |
| H | 6.44491  | 4.22547  | -4.95380 |
| H | -6.41525 | 4.17923  | -5.03192 |
| H | -6.40700 | 5.72215  | -3.19027 |
| H | 6.45239  | 5.59405  | -3.31878 |
| H | 6.45623  | 6.41673  | -1.06191 |
| H | -6.40154 | 6.44787  | -1.18427 |
| H | -6.39870 | 6.44679  | 1.21864  |
| H | 6.45832  | 6.41154  | 1.06820  |
| H | 6.45714  | 5.58655  | 3.32488  |
| H | -6.39965 | 5.71434  | 3.22099  |
| H | -6.40540 | 4.16666  | 5.05893  |
| H | 6.45307  | 4.21320  | 4.95713  |
| H | 6.44435  | 2.13064  | 6.15544  |
| H | -6.41237 | 2.31683  | 6.12027  |
| H | -6.42288 | -0.04968 | 6.53567  |
| H | 6.43531  | 0.02888  | 6.52392  |
| H | 6.42448  | -2.33608 | 6.10156  |

|   |          |          |          |
|---|----------|----------|----------|
| H | -6.43272 | -2.14844 | 6.16287  |
| H | -6.44306 | -4.22691 | 4.95751  |
| H | 6.41457  | -4.18414 | 5.03379  |
| H | 6.40461  | -5.72739 | 3.19205  |
| H | -6.45063 | -5.59547 | 3.32273  |
| H | -6.45674 | -6.41258 | 1.06331  |
| H | 6.40037  | -6.45188 | 1.18465  |
| H | 6.39766  | -6.44816 | -1.21817 |
| H | -6.45933 | -6.41124 | -1.07022 |
| H | -6.45722 | -5.58827 | -3.32756 |
| H | 6.39867  | -5.71643 | -3.22224 |
| H | 6.40477  | -4.16667 | -5.05857 |
| H | -6.45225 | -4.21444 | -4.96142 |
| H | -6.44326 | -2.13145 | -6.15878 |
| H | 6.41270  | -2.31728 | -6.11862 |
| H | 6.42345  | 0.04971  | -6.53266 |
| H | -6.43461 | -0.02997 | -6.52429 |
| H | -6.42391 | 2.33561  | -6.10138 |
| O | -0.00001 | -0.00000 | -0.00001 |
| W | 0.82077  | -1.43203 | -1.64013 |
| W | -0.82078 | 1.43203  | 1.64013  |
| W | 0.82262  | -1.41892 | 1.65054  |
| W | -0.82261 | 1.41892  | -1.65054 |
| W | -2.01593 | -1.16202 | 0.00577  |
| W | 2.01593  | 1.16202  | -0.00577 |
| O | 2.29722  | -0.21866 | -1.33287 |
| O | 0.96786  | 2.10069  | 1.32354  |
| O | -2.29722 | 0.21866  | 1.33287  |
| O | -0.96787 | -2.10070 | -1.32355 |
| O | -0.00151 | -0.01061 | -2.66486 |
| O | 1.33084  | -2.30875 | 0.00844  |
| O | 0.00149  | 0.01060  | 2.66485  |
| O | -1.33085 | 2.30875  | -0.00844 |
| O | -2.29875 | 0.20805  | -1.33199 |
| O | -0.96639 | -2.09014 | 1.34133  |
| O | 2.29876  | -0.20804 | 1.33200  |
| O | 0.96640  | 2.09014  | -1.34132 |

|   |          |          |          |
|---|----------|----------|----------|
| O | 1.42916  | -2.46505 | 2.86749  |
| O | -1.42913 | 2.46510  | -2.86746 |
| O | 3.50227  | 2.01878  | -0.01003 |
| O | -3.50226 | -2.01880 | 0.01004  |
| O | 1.42593  | -2.48786 | -2.84940 |
| O | -1.42593 | 2.48786  | 2.84940  |

**W<sub>6</sub>O<sub>19</sub><sup>2-</sup>@(9,9) h-CNT (y/z = 45°/75°)**

241

|   |          |         |          |
|---|----------|---------|----------|
| C | -4.29132 | 2.48341 | -5.68987 |
| C | -1.83417 | 2.43659 | -5.59608 |
| C | 0.61785  | 2.42441 | -5.60623 |
| C | 3.08069  | 2.41775 | -5.62251 |
| C | 5.48963  | 2.52965 | -5.78889 |
| C | -4.28510 | 3.73369 | -4.96508 |
| C | -1.82847 | 3.65720 | -4.88914 |
| C | 0.62379  | 3.65361 | -4.89464 |
| C | 3.08707  | 3.65257 | -4.90772 |
| C | 5.49597  | 3.72268 | -5.09864 |
| C | -5.46769 | 4.40407 | -4.55663 |
| C | -3.06027 | 4.22098 | -4.44637 |
| C | -0.59702 | 4.20080 | -4.43760 |
| C | 1.85505  | 4.18835 | -4.43214 |
| C | 4.31278  | 4.24382 | -4.51231 |
| C | -5.46300 | 5.28943 | -3.50005 |
| C | -3.05532 | 5.13630 | -3.35167 |
| C | -0.59212 | 5.11179 | -3.34773 |
| C | 1.86004  | 5.09380 | -3.35052 |
| C | 4.31804  | 5.17084 | -3.40353 |
| C | -4.27528 | 5.56754 | -2.77370 |
| C | -1.81835 | 5.46587 | -2.72551 |
| C | 0.63354  | 5.45978 | -2.73551 |
| C | 3.09714  | 5.46184 | -2.74610 |
| C | 5.50633  | 5.65189 | -2.79347 |
| C | -4.27173 | 6.05926 | -1.41462 |
| C | -1.81499 | 5.94658 | -1.39932 |
| C | 0.63650  | 5.94255 | -1.39978 |

|   |          |         |          |
|---|----------|---------|----------|
| C | 3.10006  | 5.94809 | -1.40495 |
| C | 5.50857  | 6.12437 | -1.49866 |
| C | -5.45551 | 6.31290 | -0.67327 |
| C | -3.04836 | 6.09596 | -0.70095 |
| C | -0.58537 | 6.06975 | -0.70057 |
| C | 1.86640  | 6.05311 | -0.69913 |
| C | 4.32328  | 6.14703 | -0.71809 |
| C | -5.45383 | 6.31205 | 0.70546  |
| C | -3.04673 | 6.09429 | 0.72602  |
| C | -0.58404 | 6.06760 | 0.71986  |
| C | 1.86797  | 6.05078 | 0.71156  |
| C | 4.32477  | 6.14317 | 0.72691  |
| C | -4.26812 | 6.05605 | 1.44334  |
| C | -1.81218 | 5.94263 | 1.42151  |
| C | 0.63978  | 5.93849 | 1.41532  |
| C | 3.10282  | 5.94243 | 1.41461  |
| C | 5.51124  | 6.11828 | 1.50568  |
| C | -4.26865 | 5.56028 | 2.80107  |
| C | -1.81279 | 5.45845 | 2.74660  |
| C | 0.63910  | 5.45065 | 2.74936  |
| C | 3.10225  | 5.45165 | 2.75421  |
| C | 5.51069  | 5.64481 | 2.80033  |
| C | -5.45530 | 5.28061 | 3.52855  |
| C | -3.04824 | 5.12674 | 3.37500  |
| C | -0.58515 | 5.10156 | 3.36399  |
| C | 1.86652  | 5.08155 | 3.35996  |
| C | 4.32381  | 5.16078 | 3.41022  |
| C | -5.45844 | 4.39243 | 4.58278  |
| C | -3.05137 | 4.20767 | 4.46648  |
| C | -0.58811 | 4.18665 | 4.45063  |
| C | 1.86342  | 4.17286 | 4.43861  |
| C | 4.32091  | 4.23055 | 4.51653  |
| C | -4.27543 | 3.71963 | 4.98698  |
| C | -1.81861 | 3.64205 | 4.90410  |
| C | 0.63317  | 3.63695 | 4.90258  |
| C | 3.09638  | 3.63642 | 4.91099  |
| C | 5.50466  | 3.70901 | 5.10094  |

|   |          |          |         |
|---|----------|----------|---------|
| C | -4.28014 | 2.46622  | 5.70710 |
| C | -1.82343 | 2.41920  | 5.60742 |
| C | 0.62823  | 2.40571  | 5.61059 |
| C | 3.09147  | 2.39976  | 5.62240 |
| C | 5.49964  | 2.51404  | 5.78827 |
| C | -5.46854 | 1.78583  | 6.08110 |
| C | -3.06084 | 1.76351  | 5.87198 |
| C | -0.59786 | 1.74623  | 5.85431 |
| C | 1.85404  | 1.72899  | 5.84525 |
| C | 4.31097  | 1.75314  | 5.94132 |
| C | -5.47456 | 0.42824  | 6.31990 |
| C | -3.06693 | 0.35783  | 6.11750 |
| C | -0.60398 | 0.34727  | 6.09960 |
| C | 1.84807  | 0.33997  | 6.08914 |
| C | 4.30486  | 0.32950  | 6.19101 |
| C | -4.29231 | -0.34835 | 6.20020 |
| C | -1.83558 | -0.35938 | 6.09345 |
| C | 0.61635  | -0.36593 | 6.09703 |
| C | 3.07953  | -0.37696 | 6.10966 |
| C | 5.48690  | -0.44798 | 6.30634 |
| C | -4.29897 | -1.77147 | 5.94731 |
| C | -1.84223 | -1.74791 | 5.84612 |
| C | 0.60964  | -1.76414 | 5.84805 |
| C | 3.07279  | -1.78151 | 5.85970 |
| C | 5.48066  | -1.80496 | 6.06446 |
| C | -5.48840 | -2.53098 | 5.79371 |
| C | -3.08022 | -2.41774 | 5.62426 |
| C | -0.61690 | -2.42372 | 5.60635 |
| C | 1.83473  | -2.43592 | 5.59556 |
| C | 4.29164  | -2.48381 | 5.68966 |
| C | -5.49440 | -3.72334 | 5.10175 |
| C | -3.08627 | -3.65173 | 4.90825 |
| C | -0.62324 | -3.65261 | 4.89426 |
| C | 1.82845  | -3.65593 | 4.88762 |
| C | 4.28519  | -3.73435 | 4.96500 |
| C | -4.31162 | -4.24325 | 4.51385 |
| C | -1.85463 | -4.18723 | 4.43190 |

|   |          |          |          |
|---|----------|----------|----------|
| C | 0.59708  | -4.19972 | 4.43624  |
| C | 3.06008  | -4.22022 | 4.44470  |
| C | 5.46690  | -4.40743 | 4.55807  |
| C | -4.31676 | -5.17047 | 3.40514  |
| C | -1.85974 | -5.09198 | 3.34958  |
| C | 0.59154  | -5.11078 | 3.34647  |
| C | 3.05444  | -5.13591 | 3.35051  |
| C | 5.46123  | -5.29316 | 3.50146  |
| C | -5.50520 | -5.65229 | 2.79619  |
| C | -3.09669 | -5.46006 | 2.74528  |
| C | -0.63387 | -5.45834 | 2.73421  |
| C | 1.81744  | -5.46562 | 2.72458  |
| C | 4.27398  | -5.56916 | 2.77381  |
| C | -5.50869 | -6.12078 | 1.49956  |
| C | -3.10040 | -5.94590 | 1.40364  |
| C | -0.63751 | -5.94205 | 1.39880  |
| C | 1.81412  | -5.94643 | 1.39865  |
| C | 4.27068  | -6.06137 | 1.41490  |
| C | -4.32423 | -6.14300 | 0.71776  |
| C | -1.86700 | -6.05246 | 0.69761  |
| C | 0.58446  | -6.07014 | 0.70006  |
| C | 3.04757  | -6.09679 | 0.70076  |
| C | 5.45441  | -6.31581 | 0.67380  |
| C | -4.32587 | -6.14124 | -0.72756 |
| C | -1.86866 | -6.05094 | -0.71308 |
| C | 0.58286  | -6.06759 | -0.72027 |
| C | 3.04590  | -6.09396 | -0.72606 |
| C | 5.45281  | -6.31353 | -0.70485 |
| C | -5.51212 | -6.11785 | -1.50729 |
| C | -3.10349 | -5.94230 | -1.41570 |
| C | -0.64045 | -5.93843 | -1.41647 |
| C | 1.81124  | -5.94102 | -1.42094 |
| C | 4.26756  | -6.05651 | -1.44277 |
| C | -5.51097 | -5.64569 | -2.80249 |
| C | -3.10244 | -5.45273 | -2.75562 |
| C | -0.63931 | -5.45082 | -2.75027 |
| C | 1.81232  | -5.45704 | -2.74575 |



|   |          |          |          |
|---|----------|----------|----------|
| C | 4.26839  | -5.56072 | -2.80042 |
| C | -4.32380 | -5.16204 | -3.41226 |
| C | -1.86671 | -5.08289 | -3.36122 |
| C | 0.58507  | -5.10096 | -3.36432 |
| C | 3.04791  | -5.12605 | -3.37379 |
| C | 5.45440  | -5.28195 | -3.52892 |
| C | -4.32050 | -4.23109 | -4.51799 |
| C | -1.86350 | -4.17396 | -4.43973 |
| C | 0.58824  | -4.18658 | -4.45091 |
| C | 3.05121  | -4.20689 | -4.46511 |
| C | 5.45792  | -4.39251 | -4.58226 |
| C | -5.50393 | -3.70963 | -5.10362 |
| C | -3.09598 | -3.63701 | -4.91184 |
| C | -0.63319 | -3.63788 | -4.90319 |
| C | 1.81874  | -3.64181 | -4.90368 |
| C | 4.27516  | -3.71893 | -4.98563 |
| C | -5.49876 | -2.51453 | -5.79071 |
| C | -3.09087 | -2.40008 | -5.62312 |
| C | -0.62808 | -2.40662 | -5.61148 |
| C | 1.82366  | -2.41923 | -5.60747 |
| C | 4.28023  | -2.46615 | -5.70627 |
| C | -4.31007 | -1.75338 | -5.94258 |
| C | -1.85357 | -1.72897 | -5.84567 |
| C | 0.59809  | -1.74653 | -5.85457 |
| C | 3.06105  | -1.76360 | -5.87179 |
| C | 5.46896  | -1.78592 | -6.07961 |
| C | -4.30371 | -0.32956 | -6.19146 |
| C | -1.84724 | -0.33968 | -6.08877 |
| C | 0.60446  | -0.34725 | -6.09851 |
| C | 3.06737  | -0.35804 | -6.11673 |
| C | 5.47504  | -0.42824 | -6.31711 |
| C | -5.48630 | 0.44731  | -6.30700 |
| C | -3.07864 | 0.37718  | -6.10914 |
| C | -0.61561 | 0.36645  | -6.09608 |
| C | 1.83607  | 0.35887  | -6.09208 |
| C | 4.29282  | 0.34859  | -6.19788 |
| C | -5.48016 | 1.80435  | -6.06464 |

|   |          |          |          |
|---|----------|----------|----------|
| C | -3.07226 | 1.78189  | -5.85951 |
| C | -0.60898 | 1.76491  | -5.84797 |
| C | 1.84288  | 1.74783  | -5.84566 |
| C | 4.29968  | 1.77121  | -5.94368 |
| H | 6.43378  | 2.14599  | -6.15735 |
| H | 6.44491  | 4.22547  | -4.95380 |
| H | -6.41525 | 4.17923  | -5.03192 |
| H | -6.40700 | 5.72215  | -3.19027 |
| H | 6.45239  | 5.59405  | -3.31878 |
| H | 6.45623  | 6.41673  | -1.06191 |
| H | -6.40154 | 6.44787  | -1.18427 |
| H | -6.39870 | 6.44679  | 1.21864  |
| H | 6.45832  | 6.41154  | 1.06820  |
| H | 6.45714  | 5.58655  | 3.32488  |
| H | -6.39965 | 5.71434  | 3.22099  |
| H | -6.40540 | 4.16666  | 5.05893  |
| H | 6.45307  | 4.21320  | 4.95713  |
| H | 6.44435  | 2.13064  | 6.15544  |
| H | -6.41237 | 2.31683  | 6.12027  |
| H | -6.42288 | -0.04968 | 6.53567  |
| H | 6.43531  | 0.02888  | 6.52392  |
| H | 6.42448  | -2.33608 | 6.10156  |
| H | -6.43272 | -2.14844 | 6.16287  |
| H | -6.44306 | -4.22691 | 4.95751  |
| H | 6.41457  | -4.18414 | 5.03379  |
| H | 6.40461  | -5.72739 | 3.19205  |
| H | -6.45063 | -5.59547 | 3.32273  |
| H | -6.45674 | -6.41258 | 1.06331  |
| H | 6.40037  | -6.45188 | 1.18465  |
| H | 6.39766  | -6.44816 | -1.21817 |
| H | -6.45933 | -6.41124 | -1.07022 |
| H | -6.45722 | -5.58827 | -3.32756 |
| H | 6.39867  | -5.71643 | -3.22224 |
| H | 6.40477  | -4.16667 | -5.05857 |
| H | -6.45225 | -4.21444 | -4.96142 |
| H | -6.44326 | -2.13145 | -6.15878 |
| H | 6.41270  | -2.31728 | -6.11862 |

|   |          |          |          |
|---|----------|----------|----------|
| H | 6.42345  | 0.04971  | -6.53266 |
| H | -6.43461 | -0.02997 | -6.52429 |
| H | -6.42391 | 2.33561  | -6.10138 |
| O | -0.00001 | -0.00000 | -0.00001 |
| W | 0.41672  | -1.59710 | -1.64013 |
| W | -0.41673 | 1.59710  | 1.64012  |
| W | 0.42199  | -1.58491 | 1.65054  |
| W | -0.42198 | 1.58491  | -1.65054 |
| W | -2.25002 | -0.59303 | 0.00580  |
| W | 2.25002  | 0.59302  | -0.00580 |
| O | 2.15958  | -0.81312 | -1.33290 |
| O | 1.48463  | 1.77359  | 1.32351  |
| O | -2.15958 | 0.81312  | 1.33290  |
| O | -1.48464 | -1.77359 | -1.32351 |
| O | -0.00427 | -0.00986 | -2.66486 |
| O | 0.67920  | -2.57685 | 0.00844  |
| O | 0.00425  | 0.00985  | 2.66485  |
| O | -0.67920 | 2.57685  | -0.00844 |
| O | -2.16388 | 0.80327  | -1.33196 |
| O | -1.48041 | -1.76377 | 1.34137  |
| O | 2.16389  | -0.80326 | 1.33197  |
| O | 1.48041  | 1.76377  | -1.34135 |
| O | 0.73316  | -2.75344 | 2.86749  |
| O | -0.73312 | 2.75348  | -2.86747 |
| O | 3.90896  | 1.03027  | -0.01010 |
| O | -3.90895 | -1.03028 | 0.01010  |
| O | 0.72398  | -2.77463 | -2.84940 |
| O | -0.72398 | 2.77464  | 2.84940  |

**W<sub>6</sub>O<sub>19</sub><sup>2-</sup>@(9,9) h-CNT (y/z = 45°/90°)**

241

|   |          |         |          |
|---|----------|---------|----------|
| C | -4.29132 | 2.48341 | -5.68987 |
| C | -1.83417 | 2.43659 | -5.59608 |
| C | 0.61785  | 2.42441 | -5.60623 |
| C | 3.08069  | 2.41775 | -5.62251 |
| C | 5.48963  | 2.52965 | -5.78889 |
| C | -4.28510 | 3.73369 | -4.96508 |

|   |          |         |          |
|---|----------|---------|----------|
| C | -1.82847 | 3.65720 | -4.88914 |
| C | 0.62379  | 3.65361 | -4.89464 |
| C | 3.08707  | 3.65257 | -4.90772 |
| C | 5.49597  | 3.72268 | -5.09864 |
| C | -5.46769 | 4.40407 | -4.55663 |
| C | -3.06027 | 4.22098 | -4.44637 |
| C | -0.59702 | 4.20080 | -4.43760 |
| C | 1.85505  | 4.18835 | -4.43214 |
| C | 4.31278  | 4.24382 | -4.51231 |
| C | -5.46300 | 5.28943 | -3.50005 |
| C | -3.05532 | 5.13630 | -3.35167 |
| C | -0.59212 | 5.11179 | -3.34773 |
| C | 1.86004  | 5.09380 | -3.35052 |
| C | 4.31804  | 5.17084 | -3.40353 |
| C | -4.27528 | 5.56754 | -2.77370 |
| C | -1.81835 | 5.46587 | -2.72551 |
| C | 0.63354  | 5.45978 | -2.73551 |
| C | 3.09714  | 5.46184 | -2.74610 |
| C | 5.50633  | 5.65189 | -2.79347 |
| C | -4.27173 | 6.05926 | -1.41462 |
| C | -1.81499 | 5.94658 | -1.39932 |
| C | 0.63650  | 5.94255 | -1.39978 |
| C | 3.10006  | 5.94809 | -1.40495 |
| C | 5.50857  | 6.12437 | -1.49866 |
| C | -5.45551 | 6.31290 | -0.67327 |
| C | -3.04836 | 6.09596 | -0.70095 |
| C | -0.58537 | 6.06975 | -0.70057 |
| C | 1.86640  | 6.05311 | -0.69913 |
| C | 4.32328  | 6.14703 | -0.71809 |
| C | -5.45383 | 6.31205 | 0.70546  |
| C | -3.04673 | 6.09429 | 0.72602  |
| C | -0.58404 | 6.06760 | 0.71986  |
| C | 1.86797  | 6.05078 | 0.71156  |
| C | 4.32477  | 6.14317 | 0.72691  |
| C | -4.26812 | 6.05605 | 1.44334  |
| C | -1.81218 | 5.94263 | 1.42151  |
| C | 0.63978  | 5.93849 | 1.41532  |

|   |          |         |         |
|---|----------|---------|---------|
| C | 3.10282  | 5.94243 | 1.41461 |
| C | 5.51124  | 6.11828 | 1.50568 |
| C | -4.26865 | 5.56028 | 2.80107 |
| C | -1.81279 | 5.45845 | 2.74660 |
| C | 0.63910  | 5.45065 | 2.74936 |
| C | 3.10225  | 5.45165 | 2.75421 |
| C | 5.51069  | 5.64481 | 2.80033 |
| C | -5.45530 | 5.28061 | 3.52855 |
| C | -3.04824 | 5.12674 | 3.37500 |
| C | -0.58515 | 5.10156 | 3.36399 |
| C | 1.86652  | 5.08155 | 3.35996 |
| C | 4.32381  | 5.16078 | 3.41022 |
| C | -5.45844 | 4.39243 | 4.58278 |
| C | -3.05137 | 4.20767 | 4.46648 |
| C | -0.58811 | 4.18665 | 4.45063 |
| C | 1.86342  | 4.17286 | 4.43861 |
| C | 4.32091  | 4.23055 | 4.51653 |
| C | -4.27543 | 3.71963 | 4.98698 |
| C | -1.81861 | 3.64205 | 4.90410 |
| C | 0.63317  | 3.63695 | 4.90258 |
| C | 3.09638  | 3.63642 | 4.91099 |
| C | 5.50466  | 3.70901 | 5.10094 |
| C | -4.28014 | 2.46622 | 5.70710 |
| C | -1.82343 | 2.41920 | 5.60742 |
| C | 0.62823  | 2.40571 | 5.61059 |
| C | 3.09147  | 2.39976 | 5.62240 |
| C | 5.49964  | 2.51404 | 5.78827 |
| C | -5.46854 | 1.78583 | 6.08110 |
| C | -3.06084 | 1.76351 | 5.87198 |
| C | -0.59786 | 1.74623 | 5.85431 |
| C | 1.85404  | 1.72899 | 5.84525 |
| C | 4.31097  | 1.75314 | 5.94132 |
| C | -5.47456 | 0.42824 | 6.31990 |
| C | -3.06693 | 0.35783 | 6.11750 |
| C | -0.60398 | 0.34727 | 6.09960 |
| C | 1.84807  | 0.33997 | 6.08914 |
| C | 4.30486  | 0.32950 | 6.19101 |

|   |          |          |         |
|---|----------|----------|---------|
| C | -4.29231 | -0.34835 | 6.20020 |
| C | -1.83558 | -0.35938 | 6.09345 |
| C | 0.61635  | -0.36593 | 6.09703 |
| C | 3.07953  | -0.37696 | 6.10966 |
| C | 5.48690  | -0.44798 | 6.30634 |
| C | -4.29897 | -1.77147 | 5.94731 |
| C | -1.84223 | -1.74791 | 5.84612 |
| C | 0.60964  | -1.76414 | 5.84805 |
| C | 3.07279  | -1.78151 | 5.85970 |
| C | 5.48066  | -1.80496 | 6.06446 |
| C | -5.48840 | -2.53098 | 5.79371 |
| C | -3.08022 | -2.41774 | 5.62426 |
| C | -0.61690 | -2.42372 | 5.60635 |
| C | 1.83473  | -2.43592 | 5.59556 |
| C | 4.29164  | -2.48381 | 5.68966 |
| C | -5.49440 | -3.72334 | 5.10175 |
| C | -3.08627 | -3.65173 | 4.90825 |
| C | -0.62324 | -3.65261 | 4.89426 |
| C | 1.82845  | -3.65593 | 4.88762 |
| C | 4.28519  | -3.73435 | 4.96500 |
| C | -4.31162 | -4.24325 | 4.51385 |
| C | -1.85463 | -4.18723 | 4.43190 |
| C | 0.59708  | -4.19972 | 4.43624 |
| C | 3.06008  | -4.22022 | 4.44470 |
| C | 5.46690  | -4.40743 | 4.55807 |
| C | -4.31676 | -5.17047 | 3.40514 |
| C | -1.85974 | -5.09198 | 3.34958 |
| C | 0.59154  | -5.11078 | 3.34647 |
| C | 3.05444  | -5.13591 | 3.35051 |
| C | 5.46123  | -5.29316 | 3.50146 |
| C | -5.50520 | -5.65229 | 2.79619 |
| C | -3.09669 | -5.46006 | 2.74528 |
| C | -0.63387 | -5.45834 | 2.73421 |
| C | 1.81744  | -5.46562 | 2.72458 |
| C | 4.27398  | -5.56916 | 2.77381 |
| C | -5.50869 | -6.12078 | 1.49956 |
| C | -3.10040 | -5.94590 | 1.40364 |

|   |          |          |          |
|---|----------|----------|----------|
| C | -0.63751 | -5.94205 | 1.39880  |
| C | 1.81412  | -5.94643 | 1.39865  |
| C | 4.27068  | -6.06137 | 1.41490  |
| C | -4.32423 | -6.14300 | 0.71776  |
| C | -1.86700 | -6.05246 | 0.69761  |
| C | 0.58446  | -6.07014 | 0.70006  |
| C | 3.04757  | -6.09679 | 0.70076  |
| C | 5.45441  | -6.31581 | 0.67380  |
| C | -4.32587 | -6.14124 | -0.72756 |
| C | -1.86866 | -6.05094 | -0.71308 |
| C | 0.58286  | -6.06759 | -0.72027 |
| C | 3.04590  | -6.09396 | -0.72606 |
| C | 5.45281  | -6.31353 | -0.70485 |
| C | -5.51212 | -6.11785 | -1.50729 |
| C | -3.10349 | -5.94230 | -1.41570 |
| C | -0.64045 | -5.93843 | -1.41647 |
| C | 1.81124  | -5.94102 | -1.42094 |
| C | 4.26756  | -6.05651 | -1.44277 |
| C | -5.51097 | -5.64569 | -2.80249 |
| C | -3.10244 | -5.45273 | -2.75562 |
| C | -0.63931 | -5.45082 | -2.75027 |
| C | 1.81232  | -5.45704 | -2.74575 |
| C | 4.26839  | -5.56072 | -2.80042 |
| C | -4.32380 | -5.16204 | -3.41226 |
| C | -1.86671 | -5.08289 | -3.36122 |
| C | 0.58507  | -5.10096 | -3.36432 |
| C | 3.04791  | -5.12605 | -3.37379 |
| C | 5.45440  | -5.28195 | -3.52892 |
| C | -4.32050 | -4.23109 | -4.51799 |
| C | -1.86350 | -4.17396 | -4.43973 |
| C | 0.58824  | -4.18658 | -4.45091 |
| C | 3.05121  | -4.20689 | -4.46511 |
| C | 5.45792  | -4.39251 | -4.58226 |
| C | -5.50393 | -3.70963 | -5.10362 |
| C | -3.09598 | -3.63701 | -4.91184 |
| C | -0.63319 | -3.63788 | -4.90319 |
| C | 1.81874  | -3.64181 | -4.90368 |

|   |          |          |          |
|---|----------|----------|----------|
| C | 4.27516  | -3.71893 | -4.98563 |
| C | -5.49876 | -2.51453 | -5.79071 |
| C | -3.09087 | -2.40008 | -5.62312 |
| C | -0.62808 | -2.40662 | -5.61148 |
| C | 1.82366  | -2.41923 | -5.60747 |
| C | 4.28023  | -2.46615 | -5.70627 |
| C | -4.31007 | -1.75338 | -5.94258 |
| C | -1.85357 | -1.72897 | -5.84567 |
| C | 0.59809  | -1.74653 | -5.85457 |
| C | 3.06105  | -1.76360 | -5.87179 |
| C | 5.46896  | -1.78592 | -6.07961 |
| C | -4.30371 | -0.32956 | -6.19146 |
| C | -1.84724 | -0.33968 | -6.08877 |
| C | 0.60446  | -0.34725 | -6.09851 |
| C | 3.06737  | -0.35804 | -6.11673 |
| C | 5.47504  | -0.42824 | -6.31711 |
| C | -5.48630 | 0.44731  | -6.30700 |
| C | -3.07864 | 0.37718  | -6.10914 |
| C | -0.61561 | 0.36645  | -6.09608 |
| C | 1.83607  | 0.35887  | -6.09208 |
| C | 4.29282  | 0.34859  | -6.19788 |
| C | -5.48016 | 1.80435  | -6.06464 |
| C | -3.07226 | 1.78189  | -5.85951 |
| C | -0.60898 | 1.76491  | -5.84797 |
| C | 1.84288  | 1.74783  | -5.84566 |
| C | 4.29968  | 1.77121  | -5.94368 |
| H | 6.43378  | 2.14599  | -6.15735 |
| H | 6.44491  | 4.22547  | -4.95380 |
| H | -6.41525 | 4.17923  | -5.03192 |
| H | -6.40700 | 5.72215  | -3.19027 |
| H | 6.45239  | 5.59405  | -3.31878 |
| H | 6.45623  | 6.41673  | -1.06191 |
| H | -6.40154 | 6.44787  | -1.18427 |
| H | -6.39870 | 6.44679  | 1.21864  |
| H | 6.45832  | 6.41154  | 1.06820  |
| H | 6.45714  | 5.58655  | 3.32488  |
| H | -6.39965 | 5.71434  | 3.22099  |



|   |          |          |          |
|---|----------|----------|----------|
| H | -6.40540 | 4.16666  | 5.05893  |
| H | 6.45307  | 4.21320  | 4.95713  |
| H | 6.44435  | 2.13064  | 6.15544  |
| H | -6.41237 | 2.31683  | 6.12027  |
| H | -6.42288 | -0.04968 | 6.53567  |
| H | 6.43531  | 0.02888  | 6.52392  |
| H | 6.42448  | -2.33608 | 6.10156  |
| H | -6.43272 | -2.14844 | 6.16287  |
| H | -6.44306 | -4.22691 | 4.95751  |
| H | 6.41457  | -4.18414 | 5.03379  |
| H | 6.40461  | -5.72739 | 3.19205  |
| H | -6.45063 | -5.59547 | 3.32273  |
| H | -6.45674 | -6.41258 | 1.06331  |
| H | 6.40037  | -6.45188 | 1.18465  |
| H | 6.39766  | -6.44816 | -1.21817 |
| H | -6.45933 | -6.41124 | -1.07022 |
| H | -6.45722 | -5.58827 | -3.32756 |
| H | 6.39867  | -5.71643 | -3.22224 |
| H | 6.40477  | -4.16667 | -5.05857 |
| H | -6.45225 | -4.21444 | -4.96142 |
| H | -6.44326 | -2.13145 | -6.15878 |
| H | 6.41270  | -2.31728 | -6.11862 |
| H | 6.42345  | 0.04971  | -6.53266 |
| H | -6.43461 | -0.02997 | -6.52429 |
| H | -6.42391 | 2.33561  | -6.10138 |
| O | -0.00001 | 0.00000  | -0.00001 |
| W | -0.01084 | -1.65053 | -1.64013 |
| W | 0.01083  | 1.65054  | 1.64012  |
| W | -0.00260 | -1.64013 | 1.65054  |
| W | 0.00261  | 1.64012  | -1.65054 |
| W | -2.32684 | 0.00953  | 0.00580  |
| W | 2.32684  | -0.00954 | -0.00580 |
| O | 1.87554  | -1.34435 | -1.33290 |
| O | 1.89308  | 1.32890  | 1.32351  |
| O | -1.87555 | 1.34435  | 1.33290  |
| O | -1.89309 | -1.32891 | -1.32351 |
| O | -0.00668 | -0.00841 | -2.66486 |

|   |          |          |          |
|---|----------|----------|----------|
| O | -0.01089 | -2.66484 | 0.00844  |
| O | 0.00666  | 0.00842  | 2.66485  |
| O | 0.01088  | 2.66484  | -0.00844 |
| O | -1.88225 | 1.33595  | -1.33196 |
| O | -1.88646 | -1.32051 | 1.34137  |
| O | 1.88226  | -1.33595 | 1.33197  |
| O | 1.88647  | 1.32051  | -1.34135 |
| O | -0.00447 | -2.84938 | 2.86749  |
| O | 0.00452  | 2.84940  | -2.86747 |
| O | 4.04242  | -0.01655 | -0.01010 |
| O | -4.04241 | 0.01653  | 0.01010  |
| O | -0.01882 | -2.86747 | -2.84940 |
| O | 0.01882  | 2.86747  | 2.84940  |

**W<sub>6</sub>O<sub>19</sub><sup>2-</sup>@(9,9) h-CNT (y/z = 45°/36°)**

241

|   |           |          |           |
|---|-----------|----------|-----------|
| C | -4.437601 | 3.163085 | -4.843956 |
| C | -1.971838 | 3.150210 | -4.775550 |
| C | 0.488927  | 3.147617 | -4.754218 |
| C | 2.959625  | 3.182878 | -4.788170 |
| C | 5.374943  | 3.337086 | -4.930682 |
| C | -4.445270 | 4.332086 | -3.998180 |
| C | -1.979435 | 4.286213 | -3.941282 |
| C | 0.481458  | 4.285301 | -3.911711 |
| C | 2.952378  | 4.325100 | -3.933853 |
| C | 5.368043  | 4.437168 | -4.104607 |
| C | -5.642150 | 4.917767 | -3.503224 |
| C | -3.220655 | 4.777483 | -3.436090 |
| C | -0.751211 | 4.767049 | -3.410181 |
| C | 1.710904  | 4.779003 | -3.394943 |
| C | 4.174227  | 4.884387 | -3.476685 |
| C | -5.647693 | 5.667508 | -2.350164 |
| C | -3.227067 | 5.548427 | -2.235521 |
| C | -0.755143 | 5.537067 | -2.220935 |
| C | 1.705638  | 5.561591 | -2.224561 |
| C | 4.168139  | 5.690846 | -2.278714 |
| C | -4.455786 | 5.886175 | -1.607517 |

|   |           |          |           |
|---|-----------|----------|-----------|
| C | -1.990300 | 5.806244 | -1.570625 |
| C | 0.470154  | 5.831346 | -1.575533 |
| C | 2.941308  | 5.898137 | -1.594044 |
| C | 5.358262  | 6.107231 | -1.623677 |
| C | -4.456711 | 6.213150 | -0.200129 |
| C | -1.990786 | 6.130791 | -0.199900 |
| C | 0.470745  | 6.178494 | -0.202060 |
| C | 2.939784  | 6.256904 | -0.213818 |
| C | 5.357637  | 6.442646 | -0.289908 |
| C | -5.647024 | 6.342390 | 0.565555  |
| C | -3.227823 | 6.192297 | 0.510565  |
| C | -0.756387 | 6.196760 | 0.503353  |
| C | 1.703743  | 6.265253 | 0.500305  |
| C | 4.167014  | 6.392558 | 0.484661  |
| C | -5.639356 | 6.199418 | 1.934003  |
| C | -3.219941 | 6.042178 | 1.929769  |
| C | -0.748541 | 6.044257 | 1.910918  |
| C | 1.711609  | 6.107192 | 1.900138  |
| C | 4.175088  | 6.230343 | 1.918381  |
| C | -4.440825 | 5.915249 | 2.643181  |
| C | -1.975532 | 5.831574 | 2.597497  |
| C | 0.485854  | 5.872686 | 2.581299  |
| C | 2.954950  | 5.943159 | 2.582174  |
| C | 5.373637  | 6.108649 | 2.672534  |
| C | -4.425837 | 5.300052 | 3.950339  |
| C | -1.962139 | 5.221322 | 3.866368  |
| C | 0.498139  | 5.239805 | 3.848348  |
| C | 2.969649  | 5.295050 | 3.852357  |
| C | 5.387461  | 5.489066 | 3.900285  |
| C | -5.609818 | 4.933304 | 4.646501  |
| C | -3.192512 | 4.830061 | 4.474686  |
| C | -0.721439 | 4.816639 | 4.429615  |
| C | 1.739074  | 4.833859 | 4.409744  |
| C | 4.202637  | 4.943495 | 4.463018  |
| C | -5.596203 | 3.948631 | 5.606960  |
| C | -3.177365 | 3.817387 | 5.479640  |
| C | -0.708407 | 3.807982 | 5.424365  |

|   |           |           |          |
|---|-----------|-----------|----------|
| C | 1.753457  | 3.817637  | 5.383732 |
| C | 4.217946  | 3.897184  | 5.458233 |
| C | -4.397913 | 3.262178  | 5.944647 |
| C | -1.933178 | 3.224669  | 5.850448 |
| C | 0.527304  | 3.225889  | 5.794655 |
| C | 2.998504  | 3.254774  | 5.797192 |
| C | 5.416597  | 3.321362  | 5.959282 |
| C | -4.387316 | 1.933948  | 6.509478 |
| C | -1.922106 | 1.932316  | 6.411911 |
| C | 0.538640  | 1.931329  | 6.366927 |
| C | 3.009625  | 1.954368  | 6.383888 |
| C | 5.426988  | 2.069696  | 6.530254 |
| C | -5.574672 | 1.194878  | 6.764960 |
| C | -3.154837 | 1.235245  | 6.592137 |
| C | -0.685549 | 1.244355  | 6.547601 |
| C | 1.776083  | 1.250584  | 6.529731 |
| C | 4.240317  | 1.294931  | 6.639369 |
| C | -5.564958 | -0.179917 | 6.818441 |
| C | -3.145625 | -0.190682 | 6.642542 |
| C | -0.674213 | -0.170524 | 6.616399 |
| C | 1.785761  | -0.153057 | 6.633097 |
| C | 4.248432  | -0.143608 | 6.766049 |
| C | -4.366184 | -0.917540 | 6.620486 |
| C | -1.901911 | -0.880742 | 6.523365 |
| C | 0.558006  | -0.863411 | 6.546365 |
| C | 3.028687  | -0.853961 | 6.610707 |
| C | 5.445643  | -0.907997 | 6.810581 |
| C | -4.353082 | -2.296794 | 6.187938 |
| C | -1.888287 | -2.228129 | 6.113540 |
| C | 0.572993  | -2.225381 | 6.158472 |
| C | 3.041599  | -2.228796 | 6.232933 |
| C | 5.458483  | -2.232891 | 6.442027 |
| C | -5.535302 | -3.036802 | 5.914319 |
| C | -3.118167 | -2.886344 | 5.809149 |
| C | -0.647392 | -2.856462 | 5.818338 |
| C | 1.812624  | -2.863375 | 5.881097 |
| C | 4.275956  | -2.888812 | 6.003408 |

|   |           |           |           |
|---|-----------|-----------|-----------|
| C | -5.515014 | -4.150487 | 5.105959  |
| C | -3.097193 | -4.039262 | 4.968145  |
| C | -0.626993 | -3.996471 | 4.979344  |
| C | 1.832662  | -3.995159 | 5.042789  |
| C | 4.297238  | -4.041735 | 5.136628  |
| C | -4.311454 | -4.611226 | 4.506094  |
| C | -1.847975 | -4.497517 | 4.450726  |
| C | 0.612513  | -4.476780 | 4.494984  |
| C | 3.081819  | -4.482210 | 4.552982  |
| C | 5.502781  | -4.609527 | 4.642051  |
| C | -4.287003 | -5.448355 | 3.328719  |
| C | -1.825772 | -5.296037 | 3.291068  |
| C | 0.633052  | -5.247981 | 3.307298  |
| C | 3.104245  | -5.236464 | 3.343253  |
| C | 5.524125  | -5.338723 | 3.476268  |
| C | -5.466432 | -5.899339 | 2.676704  |
| C | -3.052512 | -5.656334 | 2.657143  |
| C | -0.583084 | -5.561530 | 2.654715  |
| C | 1.875706  | -5.500247 | 2.666438  |
| C | 4.340354  | -5.553768 | 2.720658  |
| C | -5.452656 | -6.264522 | 1.350692  |
| C | -3.036624 | -6.042729 | 1.283979  |
| C | -0.570046 | -5.922730 | 1.285005  |
| C | 1.888706  | -5.818528 | 1.295160  |
| C | 4.354916  | -5.856628 | 1.308535  |
| C | -4.258428 | -6.208690 | 0.581258  |
| C | -1.796566 | -6.041338 | 0.576615  |
| C | 0.660341  | -5.912865 | 0.586022  |
| C | 3.130042  | -5.850985 | 0.591267  |
| C | 5.552013  | -5.949841 | 0.548638  |
| C | -4.261544 | -6.058593 | -0.853818 |
| C | -1.800151 | -5.888556 | -0.824582 |
| C | 0.657081  | -5.761361 | -0.821659 |
| C | 3.126349  | -5.697652 | -0.826902 |
| C | 5.548399  | -5.799159 | -0.818950 |
| C | -5.458532 | -5.960777 | -1.614841 |
| C | -3.043425 | -5.744230 | -1.510830 |

|   |           |           |           |
|---|-----------|-----------|-----------|
| C | -0.577258 | -5.622093 | -1.499105 |
| C | 1.881514  | -5.516512 | -1.501376 |
| C | 4.347243  | -5.545613 | -1.534214 |
| C | -5.480046 | -5.325381 | -2.834462 |
| C | -3.066931 | -5.080825 | -2.773807 |
| C | -0.597853 | -4.980162 | -2.762071 |
| C | 1.860802  | -4.911039 | -2.772102 |
| C | 4.325099  | -4.940393 | -2.845164 |
| C | -4.305276 | -4.740601 | -3.380950 |
| C | -1.844179 | -4.589471 | -3.322183 |
| C | 0.614345  | -4.530600 | -3.338366 |
| C | 3.085129  | -4.501993 | -3.380643 |
| C | 5.505869  | -4.557070 | -3.535921 |
| C | -4.338680 | -3.665858 | -4.345885 |
| C | -1.874739 | -3.557896 | -4.280633 |
| C | 0.585719  | -3.519651 | -4.330252 |
| C | 3.055022  | -3.503585 | -4.398227 |
| C | 5.477538  | -3.591330 | -4.514642 |
| C | -5.547533 | -3.086564 | -4.818413 |
| C | -3.128472 | -3.000365 | -4.675885 |
| C | -0.657905 | -2.948088 | -4.691287 |
| C | 1.801986  | -2.924740 | -4.763879 |
| C | 4.266523  | -2.939639 | -4.874132 |
| C | -5.575660 | -1.818389 | -5.352212 |
| C | -3.157171 | -1.688098 | -5.236450 |
| C | -0.686096 | -1.649725 | -5.256064 |
| C | 1.774019  | -1.635282 | -5.330501 |
| C | 4.237066  | -1.625498 | -5.468035 |
| C | -4.396250 | -1.032578 | -5.462157 |
| C | -1.930377 | -0.975004 | -5.396181 |
| C | 0.530801  | -0.955388 | -5.454619 |
| C | 2.999706  | -0.935276 | -5.541170 |
| C | 5.415230  | -0.886132 | -5.760956 |
| C | -4.414672 | 0.407613  | -5.577016 |
| C | -1.949237 | 0.429543  | -5.500464 |
| C | 0.510599  | 0.458580  | -5.536294 |
| C | 2.981633  | 0.488599  | -5.612999 |

|   |           |           |           |
|---|-----------|-----------|-----------|
| C | 5.397166  | 0.486826  | -5.835968 |
| C | -5.616881 | 1.165105  | -5.592566 |
| C | -3.194801 | 1.125344  | -5.454303 |
| C | -0.723265 | 1.147042  | -5.446756 |
| C | 1.737001  | 1.174212  | -5.475831 |
| C | 4.198977  | 1.219926  | -5.621069 |
| C | -5.627082 | 2.494576  | -5.241795 |
| C | -3.205107 | 2.505417  | -5.092809 |
| C | -0.735918 | 2.513086  | -5.071318 |
| C | 1.725859  | 2.522596  | -5.071321 |
| C | 4.188868  | 2.598634  | -5.191023 |
| H | 6.328788  | 2.978042  | -5.305399 |
| H | 6.316497  | 4.905522  | -3.859313 |
| H | -6.591664 | 4.696996  | -3.982237 |
| H | -6.600710 | 6.013979  | -1.960786 |
| H | 6.307998  | 6.069980  | -2.149225 |
| H | 6.307883  | 6.656371  | 0.190604  |
| H | -6.602621 | 6.461553  | 0.063397  |
| H | -6.589244 | 6.209889  | 2.460401  |
| H | 6.319427  | 6.422459  | 2.240758  |
| H | 6.342238  | 5.337156  | 4.395159  |
| H | -6.564099 | 5.363054  | 4.356002  |
| H | -6.541279 | 3.632727  | 6.039355  |
| H | 6.364658  | 3.829320  | 5.809299  |
| H | 6.383163  | 1.636868  | 6.809288  |
| H | -6.529810 | 1.708617  | 6.823555  |
| H | -6.511622 | -0.702340 | 6.921780  |
| H | 6.389224  | -0.424187 | 7.045311  |
| H | 6.413045  | -2.749298 | 6.396789  |
| H | -6.495560 | -2.671679 | 6.266539  |
| H | -6.460117 | -4.621560 | 4.852581  |
| H | 6.446783  | -4.387833 | 5.131322  |
| H | 6.482861  | -5.670091 | 3.088015  |
| H | -6.418886 | -5.869465 | 3.197934  |
| H | -6.396203 | -6.504876 | 0.869428  |
| H | 6.507395  | -6.051298 | 1.054524  |
| H | 6.501063  | -5.786484 | -1.339870 |

|   |           |           |           |
|---|-----------|-----------|-----------|
| H | -6.399077 | -6.299512 | -1.189969 |
| H | -6.435387 | -5.188915 | -3.333079 |
| H | 6.467679  | -4.956004 | -3.227636 |
| H | 6.419455  | -3.258987 | -4.941125 |
| H | -6.489158 | -3.609086 | -4.677229 |
| H | -6.538160 | -1.388850 | -5.614196 |
| H | 6.371158  | -1.396854 | -5.833010 |
| H | 6.337812  | 1.012875  | -5.970768 |
| H | -6.565146 | 0.673470  | -5.790683 |
| H | -6.583643 | 3.004013  | -5.171979 |
| O | 0.130983  | 0.108060  | 0.547227  |
| W | 1.502243  | -0.694479 | -1.219347 |
| W | -1.245008 | 0.913567  | 2.314752  |
| W | 1.516370  | -0.989989 | 2.134284  |
| W | -1.257594 | 1.209539  | -1.041296 |
| W | -1.216900 | -1.842719 | 0.380144  |
| W | 1.475526  | 2.062768  | 0.714566  |
| O | 2.297706  | 1.026908  | -0.730961 |
| O | 0.108400  | 2.326068  | 2.103771  |
| O | -2.037917 | -0.808293 | 1.826116  |
| O | 0.149946  | -2.108132 | -1.011184 |
| O | 0.115688  | 0.346150  | -2.152157 |
| O | 2.331331  | -1.413756 | 0.402710  |
| O | 0.141068  | -0.129465 | 3.245483  |
| O | -2.070576 | 1.629012  | 0.691202  |
| O | -2.051203 | -0.570310 | -0.851766 |
| O | 0.163048  | -2.348668 | 1.688867  |
| O | 2.310753  | 0.789503  | 1.946494  |
| O | 0.097355  | 2.564802  | -0.595244 |
| O | 2.547822  | -1.781735 | 3.288960  |
| O | -2.291434 | 2.006748  | -2.189373 |
| O | 2.476321  | 3.478906  | 0.839574  |
| O | -2.224804 | -3.254158 | 0.257502  |
| O | 2.522793  | -1.272210 | -2.502661 |
| O | -2.270777 | 1.494560  | 3.592840  |

**W<sub>6</sub>O<sub>19</sub><sup>2-</sup>@(10,10) h-CNT**



265

|   |           |          |           |
|---|-----------|----------|-----------|
| C | -4.299003 | 2.117629 | -6.532245 |
| C | -1.842395 | 2.091898 | -6.428294 |
| C | 0.610347  | 2.089968 | -6.431590 |
| C | 3.073043  | 2.100992 | -6.463069 |
| C | 5.482319  | 2.203208 | -6.626341 |
| C | -4.300355 | 3.437880 | -5.945780 |
| C | -1.843461 | 3.382358 | -5.857820 |
| C | 0.609434  | 3.388125 | -5.856641 |
| C | 3.072209  | 3.405650 | -5.883964 |
| C | 5.481637  | 3.459853 | -6.067828 |
| C | -5.488438 | 4.134862 | -5.612523 |
| C | -3.078240 | 3.994584 | -5.494296 |
| C | -0.615070 | 3.981330 | -5.472989 |
| C | 1.837907  | 3.986786 | -5.472079 |
| C | 4.294179  | 4.047052 | -5.564474 |
| C | -5.488926 | 5.157649 | -4.693344 |
| C | -3.078653 | 5.056921 | -4.540912 |
| C | -0.615510 | 5.039052 | -4.525850 |
| C | 1.837501  | 5.037984 | -4.531163 |
| C | 4.293965  | 5.122277 | -4.600021 |
| C | -4.301246 | 5.564439 | -4.036030 |
| C | -1.844237 | 5.486519 | -3.972533 |
| C | 0.608872  | 5.486457 | -3.978684 |
| C | 3.071791  | 5.510627 | -3.997980 |
| C | 5.481251  | 5.686084 | -4.070212 |
| C | -4.300754 | 6.289906 | -2.787244 |
| C | -1.843644 | 6.194908 | -2.752324 |
| C | 0.609477  | 6.200122 | -2.751167 |
| C | 3.072405  | 6.227579 | -2.763812 |
| C | 5.481836  | 6.375803 | -2.880784 |
| C | -5.487942 | 6.659386 | -2.107505 |
| C | -3.077566 | 6.476252 | -2.097028 |
| C | -0.614268 | 6.454046 | -2.090526 |
| C | 1.838746  | 6.457650 | -2.088671 |
| C | 4.295022  | 6.556985 | -2.128764 |
| C | -5.486633 | 6.949264 | -0.763419 |

|   |           |          |           |
|---|-----------|----------|-----------|
| C | -3.076111 | 6.777351 | -0.701889 |
| C | -0.612900 | 6.752902 | -0.702490 |
| C | 1.840100  | 6.753091 | -0.709213 |
| C | 4.296602  | 6.858094 | -0.716553 |
| C | -4.297787 | 6.893401 | 0.005707  |
| C | -1.840828 | 6.789965 | 0.009095  |
| C | 0.612037  | 6.791708 | 0.002284  |
| C | 3.075079  | 6.817933 | -0.000725 |
| C | 5.485172  | 6.997943 | 0.042268  |
| C | -4.295583 | 6.746963 | 1.442292  |
| C | -1.838819 | 6.644726 | 1.412226  |
| C | 0.614054  | 6.643287 | 1.414352  |
| C | 3.077105  | 6.668031 | 1.418647  |
| C | 5.487023  | 6.852817 | 1.409517  |
| C | -5.481883 | 6.648314 | 2.210720  |
| C | -3.072391 | 6.487940 | 2.108229  |
| C | -0.609337 | 6.460394 | 2.098144  |
| C | 1.843494  | 6.457268 | 2.100200  |
| C | 4.300165  | 6.557151 | 2.124702  |
| C | -5.480467 | 6.088457 | 3.466621  |
| C | -3.071151 | 5.905711 | 3.411104  |
| C | -0.608143 | 5.881555 | 3.394505  |
| C | 1.844637  | 5.882155 | 3.388291  |
| C | 4.301485  | 5.967606 | 3.442982  |
| C | -4.292977 | 5.582917 | 4.050937  |
| C | -1.836535 | 5.493160 | 3.991070  |
| C | 0.616282  | 5.495183 | 3.985931  |
| C | 3.079392  | 5.515248 | 3.998198  |
| C | 5.489565  | 5.630955 | 4.138261  |
| C | -4.293261 | 4.614286 | 5.121622  |
| C | -1.836192 | 4.547476 | 5.037840  |
| C | 0.616908  | 4.543225 | 5.039358  |
| C | 3.080093  | 4.557587 | 5.056770  |
| C | 5.490111  | 4.707970 | 5.157616  |
| C | -5.481036 | 4.082637 | 5.682225  |
| C | -3.070740 | 4.011697 | 5.507516  |
| C | -0.607319 | 3.993815 | 5.484239  |

|   |           |           |          |
|---|-----------|-----------|----------|
| C | 1.845661  | 3.987650  | 5.483809 |
| C | 4.302358  | 4.049478  | 5.561901 |
| C | -5.481082 | 2.892388  | 6.370514 |
| C | -3.071058 | 2.775266  | 6.219905 |
| C | -0.607824 | 2.762714  | 6.191739 |
| C | 1.844804  | 2.763766  | 6.186599 |
| C | 4.301404  | 2.796833  | 6.281634 |
| C | -4.293879 | 2.139672  | 6.548686 |
| C | -1.837073 | 2.099007  | 6.446157 |
| C | 0.615530  | 2.100628  | 6.442419 |
| C | 3.078159  | 2.106006  | 6.465226 |
| C | 5.487813  | 2.114966  | 6.649992 |
| C | -4.294915 | 0.726355  | 6.846071 |
| C | -1.838833 | 0.718135  | 6.735483 |
| C | 0.613411  | 0.710951  | 6.734632 |
| C | 3.076029  | 0.709583  | 6.762109 |
| C | 5.485596  | 0.770094  | 6.937143 |
| C | -5.483118 | -0.033009 | 6.986490 |
| C | -3.073750 | 0.009776  | 6.800879 |
| C | -0.611418 | 0.006083  | 6.769919 |
| C | 1.840824  | -0.001554 | 6.771242 |
| C | 4.297028  | 0.000742  | 6.877210 |
| C | -5.485599 | -1.399937 | 6.835698 |
| C | -3.076346 | -1.409429 | 6.646291 |
| C | -0.613863 | -1.405974 | 6.619376 |
| C | 1.838261  | -1.404919 | 6.622885 |
| C | 4.294401  | -1.435919 | 6.727438 |
| C | -4.299854 | -2.115162 | 6.534657 |
| C | -1.843365 | -2.091292 | 6.432972 |
| C | 0.608977  | -2.090763 | 6.436922 |
| C | 3.071346  | -2.101990 | 6.467120 |
| C | 5.480605  | -2.204489 | 6.628133 |
| C | -4.302117 | -3.433253 | 5.943128 |
| C | -1.845360 | -3.379973 | 5.857765 |
| C | 0.607250  | -3.387940 | 5.858882 |
| C | 3.069825  | -3.405696 | 5.885930 |
| C | 5.479140  | -3.460837 | 6.069350 |

|   |           |           |           |
|---|-----------|-----------|-----------|
| C | -5.490387 | -4.128773 | 5.607700  |
| C | -3.080108 | -3.990628 | 5.491844  |
| C | -0.617141 | -3.979346 | 5.472249  |
| C | 1.835451  | -3.986338 | 5.472873  |
| C | 4.291614  | -4.046601 | 5.565294  |
| C | -5.490373 | -5.153131 | 4.690156  |
| C | -3.080195 | -5.053698 | 4.538717  |
| C | -0.617365 | -5.036015 | 4.523436  |
| C | 1.835219  | -5.035276 | 4.529377  |
| C | 4.291452  | -5.119723 | 4.599022  |
| C | -4.302643 | -5.561754 | 4.034146  |
| C | -1.845975 | -5.483805 | 3.970076  |
| C | 0.606869  | -5.483362 | 3.976142  |
| C | 3.069526  | -5.506659 | 3.995907  |
| C | 5.479214  | -5.682202 | 4.069280  |
| C | -4.301965 | -6.287234 | 2.784943  |
| C | -1.845062 | -6.193130 | 2.750161  |
| C | 0.607823  | -6.196813 | 2.748431  |
| C | 3.070645  | -6.221993 | 2.761053  |
| C | 5.480187  | -6.371043 | 2.879478  |
| C | -5.489236 | -6.655151 | 2.104381  |
| C | -3.078867 | -6.475102 | 2.094868  |
| C | -0.615588 | -6.451789 | 2.087897  |
| C | 1.837382  | -6.453104 | 2.085692  |
| C | 4.293685  | -6.550581 | 2.126682  |
| C | -5.487632 | -6.946694 | 0.760564  |
| C | -3.076987 | -6.777266 | 0.699681  |
| C | -0.613592 | -6.751323 | 0.699851  |
| C | 1.839565  | -6.749749 | 0.706560  |
| C | 4.296195  | -6.851855 | 0.714930  |
| C | -4.298538 | -6.893433 | -0.008160 |
| C | -1.841618 | -6.790844 | -0.011685 |
| C | 0.611654  | -6.790129 | -0.004863 |
| C | 3.075007  | -6.814574 | -0.001457 |
| C | 5.485575  | -6.991098 | -0.042269 |
| C | -4.296196 | -6.749717 | -1.444940 |
| C | -1.839392 | -6.648926 | -1.415325 |

|   |           |           |           |
|---|-----------|-----------|-----------|
| C | 0.613808  | -6.645335 | -1.417200 |
| C | 3.077400  | -6.667307 | -1.420731 |
| C | 5.488116  | -6.847470 | -1.409700 |
| C | -5.482804 | -6.651579 | -2.212947 |
| C | -3.072721 | -6.493740 | -2.111757 |
| C | -0.609694 | -6.465998 | -2.101690 |
| C | 1.843638  | -6.459724 | -2.102951 |
| C | 4.301100  | -6.555014 | -2.125956 |
| C | -5.481292 | -6.095046 | -3.470001 |
| C | -3.071270 | -5.914602 | -3.415887 |
| C | -0.608080 | -5.889213 | -3.399006 |
| C | 1.845120  | -5.886469 | -3.391980 |
| C | 4.302441  | -5.966489 | -3.444711 |
| C | -4.293323 | -5.592098 | -4.055706 |
| C | -1.836694 | -5.501628 | -3.995708 |
| C | 0.616407  | -5.501499 | -3.990123 |
| C | 3.079739  | -5.517530 | -4.001559 |
| C | 5.490734  | -5.628131 | -4.138836 |
| C | -4.293299 | -4.622388 | -5.125503 |
| C | -1.836710 | -4.553456 | -5.040055 |
| C | 0.616355  | -4.547963 | -5.042160 |
| C | 3.079427  | -4.559941 | -5.059873 |
| C | 5.490253  | -4.706094 | -5.158818 |
| C | -5.480755 | -4.089013 | -5.685150 |
| C | -3.071338 | -4.016472 | -5.507706 |
| C | -0.608213 | -3.997440 | -5.484428 |
| C | 1.844589  | -3.990415 | -5.485894 |
| C | 4.301528  | -4.050347 | -5.564147 |
| C | -5.481946 | -2.893621 | -6.364509 |
| C | -3.072506 | -2.776231 | -6.213572 |
| C | -0.609416 | -2.763482 | -6.186660 |
| C | 1.843271  | -2.765098 | -6.185510 |
| C | 4.299684  | -2.798462 | -6.284176 |
| C | -4.295383 | -2.139230 | -6.538850 |
| C | -1.838955 | -2.099093 | -6.437742 |
| C | 0.613925  | -2.101124 | -6.437119 |
| C | 3.076541  | -2.107537 | -6.465368 |

|   |           |           |           |
|---|-----------|-----------|-----------|
| C | 5.486258  | -2.117320 | -6.652971 |
| C | -4.296464 | -0.725296 | -6.833575 |
| C | -1.840198 | -0.717794 | -6.724914 |
| C | 0.612661  | -0.711034 | -6.727275 |
| C | 3.075224  | -0.710394 | -6.759817 |
| C | 5.484786  | -0.772252 | -6.938898 |
| C | -5.484041 | 0.034663  | -6.975430 |
| C | -3.074942 | -0.009249 | -6.789531 |
| C | -0.612224 | -0.006322 | -6.760873 |
| C | 1.840507  | 0.000993  | -6.765878 |
| C | 4.296812  | -0.001885 | -6.875959 |
| C | -5.485409 | 1.402101  | -6.830309 |
| C | -3.076100 | 1.410337  | -6.639624 |
| C | -0.613202 | 1.405698  | -6.612376 |
| C | 1.839523  | 1.404272  | -6.617626 |
| C | 4.295706  | 1.434797  | -6.724448 |
| H | 6.434723  | 1.771250  | -6.925417 |
| H | 6.433656  | 3.971885  | -5.947050 |
| H | -6.440934 | 3.812235  | -6.027085 |
| H | -6.441654 | 5.603573  | -4.416700 |
| H | 6.433498  | 5.509176  | -4.565009 |
| H | 6.434345  | 6.717047  | -2.481590 |
| H | -6.440978 | 6.642004  | -2.631363 |
| H | -6.438632 | 7.149198  | -0.276850 |
| H | 6.436779  | 7.146305  | -0.463075 |
| H | 6.440017  | 6.891966  | 1.932380  |
| H | -6.434475 | 6.946310  | 1.778766  |
| H | -6.431873 | 5.966603  | 3.979363  |
| H | 6.442078  | 6.046763  | 3.817444  |
| H | 6.443012  | 4.429930  | 5.602383  |
| H | -6.433064 | 4.578639  | 5.507095  |
| H | -6.433241 | 2.493247  | 6.712873  |
| H | 6.441195  | 2.638358  | 6.635488  |
| H | 6.437287  | 0.283232  | 7.137876  |
| H | -6.434550 | 0.471733  | 7.138539  |
| H | -6.438849 | -1.922281 | 6.875659  |
| H | 6.433547  | -1.772448 | 6.925304  |

|   |           |           |           |
|---|-----------|-----------|-----------|
| H | 6.430904  | -3.973196 | 5.947545  |
| H | -6.443282 | -3.805474 | 6.020817  |
| H | -6.443433 | -5.598315 | 4.413249  |
| H | 6.431155  | -5.507081 | 4.565415  |
| H | 6.432627  | -6.713257 | 2.480870  |
| H | -6.442482 | -6.637205 | 2.627829  |
| H | -6.439758 | -7.146624 | 0.274124  |
| H | 6.436958  | -7.137066 | 0.464299  |
| H | 6.441620  | -6.884742 | -1.931720 |
| H | -6.435780 | -6.946658 | -1.779578 |
| H | -6.432997 | -5.971549 | -3.981875 |
| H | 6.443867  | -6.041408 | -3.816644 |
| H | 6.442946  | -4.425996 | -5.602713 |
| H | -6.432369 | -4.586878 | -5.512993 |
| H | -6.434376 | -2.492949 | -6.704088 |
| H | 6.439208  | -2.641596 | -6.639636 |
| H | 6.436649  | -0.286102 | -7.140065 |
| H | -6.435813 | -0.469486 | -7.127168 |
| H | -6.438199 | 1.924826  | -6.872588 |
| O | -0.933023 | -0.178004 | 1.207564  |
| W | 0.638535  | -0.494032 | -0.582585 |
| W | -2.500553 | 0.138933  | 2.913405  |
| W | 0.675111  | -0.931144 | 2.739947  |
| W | -2.531056 | 0.588680  | -0.404640 |
| W | -1.695438 | -2.412556 | 0.896995  |
| W | -0.158668 | 2.060836  | 1.479570  |
| O | 0.933894  | 1.350971  | 0.023000  |
| O | -1.569923 | 1.873075  | 2.838785  |
| O | -2.802053 | -1.719635 | 2.359608  |
| O | -0.286032 | -2.217093 | -0.444673 |
| O | -0.958421 | 0.179327  | -1.488457 |
| O | 1.607769  | -1.038256 | 1.038489  |
| O | -0.905030 | -0.536556 | 3.860319  |
| O | -3.471254 | 0.685841  | 1.318486  |
| O | -2.821726 | -1.350730 | -0.300579 |
| O | -0.262198 | -2.588776 | 2.227873  |
| O | 0.967575  | 1.005970  | 2.687904  |

|   |           |           |           |
|---|-----------|-----------|-----------|
| O | -1.599056 | 2.218922  | 0.163445  |
| O | 1.881362  | -1.480091 | 3.866667  |
| O | -3.711340 | 1.138478  | -1.548557 |
| O | 0.421002  | 3.690003  | 1.680448  |
| O | -2.261964 | -4.041363 | 0.664516  |
| O | 1.783130  | -0.718379 | -1.861357 |
| O | -3.698750 | 0.367803  | 4.154815  |
